# Supplementary material for: Association of gut microbiota with age-related macular degeneration and glaucoma: a bidirectional Mendelian randomization study
Source: Preprints.org preprint supplement (doi:10.20944/preprints202310.0525.v1), 2023-10-09
Supplement: Supplementary file 1 [file supplementary]

## Sheet: Sheet1
Table S2. SNPs information of bacteria with glaucoma.
Bacterial taxa (Exposures)	SNP	Effect allele	Other allele	Exposure (Bacteria)			Outcome (glaucoma)
				Beta	SE	P	Beta	SE	P
Adlercreutzia	rs13231526	C	A	0.143237	0.0311654	4.81e-06	0.00402175	0.0197572	0.838698
Adlercreutzia	rs2717140	C	T	-0.119225	0.0251081	2.05e-06	-0.0332176	0.0171831	0.053217
Adlercreutzia	rs7680684	T	C	0.083381	0.0168901	9.77e-07	0.0174852	0.0115351	0.129564
Adlercreutzia	rs9490822	C	T	-0.0734512	0.0155789	2.54e-06	0.00531195	0.0105653	0.615124
Akkermansia	rs111862613	T	C	0.0911199	0.0196748	3.39e-06	0.0115032	0.0140371	0.41251
Akkermansia	rs117107102	A	G	0.204406	0.0431629	3.01e-06	-0.0159161	0.0261671	0.543021
Akkermansia	rs11729256	T	C	0.0750473	0.0150184	6.58e-07	-0.0189925	0.0120342	0.114518
Akkermansia	rs12908520	G	A	0.061772	0.0130954	2.26e-06	-0.00909326	0.0106102	0.39143
Akkermansia	rs2602429	T	C	-0.0745352	0.0156201	2.72e-06	0.00683491	0.012766	0.592374
Akkermansia	rs4242783	A	G	-0.0685454	0.0147701	3e-06	0.00585418	0.0119708	0.624814
Akkermansia	rs74542928	T	C	0.112623	0.0236434	1.48e-06	-0.00252533	0.0175383	0.885509
Akkermansia	rs9349825	A	G	-0.0703407	0.0147133	2.6e-06	0.00665166	0.0119575	0.578024
Alistipes	rs1107244	G	A	0.0758558	0.0171182	3.59062e-06	0.0230994	0.0186538	0.215596
Alistipes	rs11769002	G	A	-0.0528793	0.0109389	1.44961e-06	0.0037129	0.0107392	0.729543
Alistipes	rs67705352	T	G	-0.0532404	0.0110864	1.65124e-06	0.00129211	0.0108736	0.90541
Alistipes	rs7129639	A	C	0.0524955	0.0109584	1.78423e-06	-0.000632584	0.0108548	0.953528
Alistipes	rs8130320	A	G	-0.049002	0.010717	4.83615e-06	-0.00118337	0.0105953	0.911071
Allisonella	rs1901739	G	T	-0.115769	0.0248626	3.58798e-06	0.0097301	0.0105527	0.356503
Allisonella	rs35778461	C	T	0.146679	0.0297186	1.20629e-06	0.000794191	0.0133159	0.95244
Allisonella	rs602075	G	A	-0.168974	0.0296976	3.56574e-08	-0.00175144	0.0119404	0.883383
Allisonella	rs6742198	A	G	-0.149152	0.0316484	3.34511e-06	0.00848416	0.0129896	0.513659
Anaerofilum	rs10794359	C	T	0.0953524	0.02006	2.23496e-06	0.00950594	0.0106157	0.370541
Anaerofilum	rs17096874	C	T	-0.126337	0.0268919	2.86029e-06	0.0149252	0.0141321	0.290914
Anaerofilum	rs4506496	A	G	-0.10309	0.0212861	1.48659e-06	0.00687125	0.0111767	0.538696
Anaerofilum	rs712981	A	C	0.10076	0.0202902	6.83109e-07	-0.00475435	0.0107092	0.65708
Anaerofilum	rs79598899	C	T	0.182586	0.0357284	3.74731e-07	-0.00175825	0.0188066	0.925513
Anaerofilum	rs816292	T	C	-0.113003	0.02204	2.6404e-07	-0.00117885	0.0119327	0.921304
Anaerostipes	rs2014785	T	C	0.0515687	0.0112199	4.68e-06	-0.00162122	0.0107904	0.88057
Anaerostipes	rs2396460	C	T	0.0512653	0.0109555	2.91e-06	-0.0235854	0.0105836	0.0258476
Anaerostipes	rs2804244	G	A	0.053089	0.0110983	2.04e-06	-0.00544881	0.0105204	0.604511
Anaerostipes	rs3900776	G	A	-0.110013	0.0236302	2.75e-06	0.00306099	0.0205393	0.881529
Anaerostipes	rs60983350	G	A	-0.0539901	0.0116575	4.42e-06	0.0100162	0.0111459	0.368844
Anaerostipes	rs62157625	T	C	0.088573	0.0185548	1.45e-06	0.0355801	0.0165461	0.0315268
Anaerostipes	rs62215703	G	A	0.0644965	0.0136702	1.98e-06	-0.0102637	0.0129865	0.429333
Anaerostipes	rs6726833	C	A	-0.0877497	0.0189408	3.32e-06	-0.0226929	0.0200877	0.258606
Anaerostipes	rs6854026	C	T	0.0508482	0.0109075	3.2e-06	-0.00722063	0.0105137	0.492221
Anaerotruncus	rs1272208	T	G	0.0611743	0.0129831	4.27986e-06	-0.00802959	0.0123695	0.516244
Anaerotruncus	rs4669806	G	T	0.0576389	0.0122994	2.42058e-06	0.0395881	0.0118193	0.000809767
Anaerotruncus	rs6563550	T	C	0.0877135	0.0176745	2.34515e-07	0.023087	0.0186589	0.215969
Anaerotruncus	rs8005030	C	T	0.0554447	0.0117854	2.28297e-06	-0.0118835	0.0112537	0.290985
Anaerotruncus	rs9347879	T	C	0.050618	0.011049	4.22328e-06	0.00440108	0.0105199	0.675685
Bacteroides	rs11585893	A	G	-0.0740746	0.0147633	1.79511e-06	-0.0138902	0.0151141	0.358082
Bacteroides	rs17619981	T	G	0.0880978	0.0187002	2.68683e-06	-0.0180458	0.0173253	0.297602
Bacteroides	rs66474973	G	T	0.0812515	0.0164479	6.80973e-07	0.00848257	0.0161481	0.599376
Bacteroides	rs6795673	C	T	0.0538565	0.0105251	3.37909e-07	0.00983403	0.010556	0.351539
Bacteroides	rs9507307	C	T	0.0604456	0.0129128	2.12711e-06	-0.0202973	0.0132666	0.126028
Barnesiella	rs12909713	C	T	-0.0550716	0.0120039	4.94527e-06	-0.00808322	0.010609	0.446107
Barnesiella	rs13242616	C	T	0.0583747	0.0123176	2.29018e-06	-0.00411513	0.0108657	0.704891
Barnesiella	rs199035	G	A	0.0559495	0.0119716	3.00296e-06	-0.00450652	0.0105383	0.668917
Barnesiella	rs2276875	A	G	-0.0697176	0.0139537	4.65029e-07	-0.00204747	0.0120282	0.864835
Barnesiella	rs2428166	G	A	-0.165859	0.0337309	8.50883e-07	0.00922221	0.022887	0.686989
Barnesiella	rs35177866	A	G	0.0917125	0.0190133	2.94761e-06	-0.0280604	0.0157199	0.0742574
Barnesiella	rs60316894	C	T	-0.121478	0.025184	1.19064e-06	0.01843	0.0224422	0.41152
Barnesiella	rs62251337	G	A	0.0690763	0.0149374	4.2416e-06	-0.00835386	0.0126082	0.507603
Barnesiella	rs77455852	T	G	-0.0891491	0.0195601	3.16352e-06	-0.0184755	0.0159902	0.247916
Barnesiella	rs79795328	A	G	-0.0818645	0.0176441	4.23302e-06	0.0176824	0.0153494	0.249324
Bifidobacterium	rs182549	T	C	-0.119703	0.0127294	1.2782e-20	-0.0114945	0.0122908	0.349678
Bifidobacterium	rs62181700	G	A	-0.0624643	0.0131205	2.17245e-06	0.0119263	0.011712	0.308535
Bifidobacterium	rs7322849	T	C	0.112428	0.0201813	1.08368e-08	0.0102767	0.0205662	0.617295
Bifidobacterium	rs73797465	T	G	-0.0953566	0.0209236	4.38157e-06	0.00143356	0.0212704	0.946266
Bifidobacterium	rs75344046	C	T	0.232354	0.0505979	4.86351e-06	0.0257918	0.0261345	0.323697
Bifidobacterium	rs857444	C	T	0.0558234	0.0121219	3.571e-06	0.0193447	0.0109813	0.0781376
Bilophila	rs1241171	G	A	-0.0692654	0.0150148	4.24033e-06	0.0143409	0.0128981	0.266196
Bilophila	rs1571225	T	C	-0.0826826	0.0170621	1.1229e-06	-0.0154621	0.0152543	0.310761
Bilophila	rs3827020	C	T	0.0766479	0.0160642	1.78875e-06	-0.0132766	0.0137828	0.335408
Bilophila	rs542415	T	C	-0.0613623	0.0133436	4.70945e-06	-0.00752755	0.0111279	0.498752
Bilophila	rs6793291	A	C	-0.112729	0.0241633	3.11322e-06	-0.0112246	0.018031	0.533601
Bilophila	rs7802841	A	C	-0.0670097	0.0137701	1.76954e-06	0.00275073	0.01139	0.809164
Butyricimonas	rs113054641	G	A	-0.144881	0.0274574	1.73696e-07	0.00750364	0.0210442	0.721416
Butyricimonas	rs1862649	G	A	0.113124	0.0248176	4.76255e-06	-0.00293849	0.0184678	0.873579
Butyricimonas	rs62130338	A	G	0.0732608	0.0158324	3.89807e-06	-0.00242788	0.0126153	0.847385
Butyricimonas	rs62390301	T	C	-0.0872983	0.0174893	7.41908e-07	0.0149679	0.0132146	0.25735
Butyricimonas	rs7083431	A	C	0.0703539	0.0144439	8.85462e-07	-0.00271097	0.0109802	0.804988
Butyricimonas	rs71428626	G	T	-0.133188	0.0289905	4.80408e-06	0.0274204	0.0208342	0.188133
Butyricimonas	rs78453362	A	G	-0.14948	0.0327073	4.05807e-06	-0.0251436	0.0238473	0.291719
Butyricimonas	rs9657374	C	T	0.0680719	0.0148172	4.5036e-06	-0.0287122	0.0114328	0.0120257
Butyrivibrio	rs11761679	T	C	0.154775	0.0321539	2.20232e-06	0.0322459	0.0139575	0.0208723
Butyrivibrio	rs16941336	C	T	0.127488	0.0267936	1.53183e-06	0.0109766	0.0118817	0.355579
Butyrivibrio	rs4537857	T	C	-0.12459	0.0260992	1.80194e-06	0.0141441	0.0114764	0.217781
Butyrivibrio	rs72723662	C	T	0.224078	0.0449336	7.86249e-07	-0.000647547	0.0183361	0.971828
Butyrivibrio	rs74622183	A	G	-0.201027	0.0428204	2.45748e-06	-0.0175646	0.0194361	0.366149
Butyrivibrio	rs7752361	G	A	0.11923	0.0239975	7.69113e-07	0.0213017	0.0105734	0.043942
Butyrivibrio	rs7763512	A	G	-0.119846	0.0253367	3.10656e-06	0.00567022	0.0106885	0.595765
Candidatus Soleaferrea	rs10090365	G	A	0.0834413	0.0180989	4.17311e-06	-0.00528982	0.0105446	0.615904
Candidatus Soleaferrea	rs10108780	A	G	-0.092834	0.0199807	3.64083e-06	-0.00332199	0.011543	0.773507
Candidatus Soleaferrea	rs4294381	C	T	-0.112197	0.023186	1.36848e-06	-0.00310114	0.0131874	0.814086
Candidatus Soleaferrea	rs830151	A	G	-0.194561	0.0347932	4.25608e-08	-0.0425601	0.0240088	0.0762816
Catenibacterium	rs12404911	C	T	0.140717	0.0304142	2.79892e-06	0.0123812	0.0133575	0.353975
Catenibacterium	rs212393	A	G	0.135254	0.0286209	3.62485e-06	-0.0153954	0.0112481	0.171091
Catenibacterium	rs73128290	A	G	0.129726	0.0284563	4.29368e-06	-0.00313794	0.0118111	0.790487
Catenibacterium	rs77285108	G	A	-0.161826	0.0353447	3.62677e-06	-0.0236473	0.0143051	0.098315
Christensenellaceae R 7group	rs17081797	A	G	-0.0904325	0.0204253	3.34033e-06	0.0300107	0.0199584	0.132668
Christensenellaceae R 7group	rs62467127	C	T	0.114108	0.0251983	3.25364e-06	-0.0310786	0.023251	0.181335
Christensenellaceae R 7group	rs892686	A	G	0.0514099	0.011136	3.96862e-06	-0.00600454	0.0105431	0.569001
Clostridium sensustricto1	rs115807074	A	G	-0.22736	0.0492575	4.31688e-06	-0.0017186	0.024903	0.94498
Clostridium sensustricto1	rs116847295	C	T	0.110021	0.0246032	4.58121e-06	-0.00862106	0.0223736	0.699998
Clostridium sensustricto1	rs12341505	G	A	0.0810718	0.0180121	4.8217e-06	-0.0601077	0.0152135	7.78395e-05
Clostridium sensustricto1	rs2795528	G	A	-0.184315	0.0392204	2.72038e-06	0.0124282	0.02251	0.580869
Clostridium sensustricto1	rs2817172	C	T	0.058139	0.0124492	2.76656e-06	-0.0154853	0.0109217	0.156237
Clostridium sensustricto1	rs550843	T	C	-0.0783246	0.0169209	2.05069e-06	-0.0211313	0.0160059	0.18676
Collinsella	rs2103510	G	A	0.0786551	0.0168217	2.42477e-06	0.0100229	0.015413	0.515508
Collinsella	rs73052258	G	A	0.0930178	0.0202658	1.71581e-06	-0.019419	0.0178075	0.275493
Collinsella	rs9541268	C	A	0.09597	0.0197312	8.79427e-07	0.00782871	0.0161995	0.628905
Coprobacter	rs143662916	C	T	0.253264	0.0540141	3.07249e-06	0.00598288	0.0221803	0.787361
Coprobacter	rs213863	T	C	0.0887412	0.0188377	2.34882e-06	-0.00949599	0.0116507	0.415039
Coprobacter	rs305411	A	G	0.129218	0.0264518	1.00907e-06	-0.0387254	0.0166593	0.020096
Coprobacter	rs3828477	G	T	-0.0912179	0.019569	2.88975e-06	-0.00943338	0.012196	0.439237
Coprobacter	rs72821405	T	C	-0.147365	0.0319978	4.75762e-06	0.0161817	0.0186308	0.385096
Coprococcus1	rs1010560	C	A	0.0580232	0.0122722	1.95916e-06	-0.0202037	0.011427	0.0770513
Coprococcus1	rs12794898	G	T	0.0903299	0.0197212	4.9153e-06	0.0167907	0.019145	0.380472
Coprococcus1	rs1576241	A	G	-0.0510343	0.0109535	3.32859e-06	0.000502859	0.0105144	0.961855
Coprococcus1	rs4277593	G	A	-0.0585649	0.0109914	1.1397e-07	-0.0175959	0.0105061	0.093968
Coprococcus1	rs56405618	A	G	-0.08963	0.0186508	1.57195e-06	0.0149593	0.0174983	0.392606
Coprococcus1	rs73031725	T	C	0.167591	0.0355224	1.97916e-06	0.0355485	0.0262767	0.176103
Coprococcus1	rs74101919	T	C	-0.0718988	0.0144651	1.0329e-06	0.0214202	0.0135267	0.113294
Coprococcus2	rs2482516	C	T	0.0754415	0.0164619	4.72335e-06	0.0169278	0.013021	0.193587
Coprococcus2	rs6677933	C	T	-0.0804405	0.0164216	1.185e-06	0.00578934	0.0127156	0.648899
Coprococcus2	rs72680320	T	C	-0.0649382	0.013919	2.27117e-06	0.0150163	0.0105924	0.156291
Coprococcus3	rs11080344	C	T	0.0516921	0.0113054	4.78696e-06	-0.0159717	0.0105885	0.13145
Coprococcus3	rs13394391	C	T	-0.0709302	0.0150918	2.20318e-06	-0.0226089	0.0140631	0.107905
Coprococcus3	rs178271	C	T	-0.145257	0.0294239	7.81088e-07	-0.0115278	0.0222514	0.604409
Coprococcus3	rs7521171	A	G	0.0596434	0.0129279	4.32245e-06	-0.0152905	0.0117475	0.193053
Coprococcus3	rs8100692	T	C	0.0577411	0.0113476	4.16457e-07	-0.0167352	0.0106443	0.115899
Defluviitaleaceae UCG011	rs112893842	T	C	0.11381	0.0232806	1.44534e-06	-0.026891	0.0159156	0.0911045
Defluviitaleaceae UCG011	rs1582238	C	T	-0.0805036	0.0167257	1.56776e-06	0.0159925	0.0111796	0.152573
Defluviitaleaceae UCG011	rs4344384	T	G	-0.0715978	0.0156309	4.83237e-06	-0.0176375	0.0105224	0.0937022
Defluviitaleaceae UCG011	rs4677103	A	G	0.0977912	0.0197263	9.59555e-07	0.0136681	0.0132874	0.303643
Defluviitaleaceae UCG011	rs55658617	T	C	0.174369	0.0362226	2.15293e-06	0.00784014	0.0194993	0.68763
Defluviitaleaceae UCG011	rs72731813	C	T	-0.147383	0.0293796	4.33112e-07	0.035114	0.0188359	0.0622917
Defluviitaleaceae UCG011	rs9608282	T	G	0.142939	0.0299793	2.52046e-06	-0.0176075	0.0198093	0.374086
Defluviitaleaceae UCG011	rs9725395	A	G	-0.13834	0.029554	3.51925e-06	0.0115285	0.0195195	0.55478
Desulfovibrio	rs13066142	G	A	0.119141	0.0250891	3.78669e-06	-0.00851518	0.0190499	0.65488
Desulfovibrio	rs16863365	A	G	0.109402	0.0226964	1.79449e-06	-0.0130908	0.0156482	0.402836
Desulfovibrio	rs2456226	A	C	0.0854927	0.0172749	8.5487e-07	-0.0141549	0.0112982	0.210263
Desulfovibrio	rs2853179	T	C	-0.0811971	0.0174234	2.42438e-06	-0.00391755	0.0123757	0.751583
Desulfovibrio	rs6580353	T	C	0.0770979	0.0169735	4.93856e-06	-0.0121932	0.012546	0.331112
Dorea	rs13279148	G	A	0.0715309	0.0150878	2.25284e-06	0.00784431	0.0144375	0.586904
Dorea	rs1899291	T	C	-0.0697217	0.0150285	4.56688e-06	-0.00307768	0.0157945	0.845504
Dorea	rs4793307	C	T	0.0574165	0.0122472	4.00691e-06	-0.0058478	0.0119048	0.623274
Dorea	rs62503162	A	G	-0.0974091	0.0194379	7.46603e-07	0.00232397	0.0183919	0.899448
Dorea	rs73729431	C	T	-0.13745	0.0299983	3.16738e-06	-0.00248697	0.022941	0.913673
Eggerthella	rs112205261	T	C	-0.188618	0.0403613	3.34649e-06	-0.0106868	0.0211634	0.61358
Eggerthella	rs2223081	A	G	-0.102572	0.0221108	3.88893e-06	-0.0371391	0.0120018	0.0019717
Eggerthella	rs2240838	G	A	-0.0980582	0.0197653	7.36207e-07	0.00221574	0.0106	0.834423
Eggerthella	rs3851328	G	T	0.107774	0.0236527	4.1759e-06	0.0141688	0.0124412	0.254762
Eggerthella	rs76663501	C	T	0.175349	0.0378576	4.8257e-06	-0.0106886	0.018357	0.56039
Eisenbergiella	rs11027642	C	T	0.129006	0.0284844	4.9187e-06	0.000744364	0.0159702	0.962824
Eisenbergiella	rs1508033	A	C	0.091546	0.0195787	3.22887e-06	0.00910895	0.0109499	0.40548
Eisenbergiella	rs2683098	T	C	-0.107319	0.022515	2.23748e-06	0.0110011	0.0128539	0.392076
Eisenbergiella	rs3812426	A	G	-0.106447	0.0224159	2.71688e-06	0.0268146	0.0124855	0.031741
Eisenbergiella	rs4462860	G	A	0.0939071	0.0201104	4.16217e-06	-0.00230049	0.0111141	0.836018
Enterorhabdus	rs114731706	T	G	0.182308	0.0382298	2.1734e-06	-0.0253197	0.0227471	0.265667
Enterorhabdus	rs3017103	G	A	-0.0980897	0.0208995	2.94042e-06	0.000747822	0.0136499	0.956309
Enterorhabdus	rs73331712	T	C	0.26199	0.055123	4.8492e-06	-0.0274277	0.0247624	0.268019
Erysipelatoclostridium	rs17804233	C	T	0.0662914	0.0144203	4.58606e-06	-0.033909	0.0105101	0.00125389
Erysipelatoclostridium	rs340991	A	G	-0.0740482	0.0158891	3.74938e-06	0.000724522	0.0114389	0.949497
Erysipelatoclostridium	rs4697572	A	G	-0.0810636	0.0163308	7.59347e-07	0.00633524	0.0120028	0.597628
Erysipelatoclostridium	rs58236560	G	T	-0.111157	0.0234426	2.16118e-06	0.0181559	0.0176291	0.303065
Erysipelatoclostridium	rs622418	A	G	-0.0668051	0.0143224	3.68154e-06	0.0118789	0.0105041	0.258104
Erysipelatoclostridium	rs6474512	C	A	-0.067015	0.0143201	3.01544e-06	-0.00360018	0.0105844	0.73375
Erysipelatoclostridium	rs710230	C	T	-0.143381	0.0281514	6.33126e-07	-0.023319	0.0202783	0.250164
Erysipelatoclostridium	rs7221249	G	A	-0.0839861	0.0142741	4.30953e-09	0.00931207	0.0105336	0.376678
Escherichia Shigella	rs113127095	A	G	0.151009	0.0323434	3.3335e-06	-0.0038197	0.0218326	0.861116
Escherichia Shigella	rs1154904	G	A	0.0613376	0.0130644	3.03753e-06	0.00575775	0.0105267	0.584401
Escherichia Shigella	rs592299	T	C	-0.0592004	0.0129486	4.76925e-06	0.0206528	0.0105337	0.0499206
Escherichia Shigella	rs73208162	A	G	-0.119296	0.024839	2.19392e-06	-0.026708	0.0204379	0.191285
Eubacterium brachy group	rs112617308	T	C	-0.170873	0.0362844	2.38035e-06	0.0164587	0.0175166	0.347419
Eubacterium brachy group	rs2913110	T	C	-0.105143	0.022942	4.55806e-06	-0.00933734	0.0106731	0.381656
Eubacterium brachy group	rs4862235	A	G	-0.104806	0.0225751	3.73147e-06	-0.0182891	0.0106536	0.08603
Eubacterium brachy group	rs62348779	T	C	-0.201481	0.043286	3.7812e-06	0.00265022	0.0199843	0.894498
Eubacterium coprostanoligenes group	rs12906958	C	T	-0.0533159	0.0115935	4.348e-06	0.00154834	0.0113061	0.891072
Eubacterium coprostanoligenes group	rs17159861	C	T	0.0962228	0.0168388	1.03786e-08	0.0325016	0.0161723	0.0444621
Eubacterium coprostanoligenes group	rs4076415	G	T	-0.0515152	0.0110294	1.98976e-06	-0.0202178	0.0106376	0.0573548
Eubacterium coprostanoligenes group	rs6762473	A	C	-0.0521584	0.0112353	4.26108e-06	0.0202872	0.0110917	0.0673938
Eubacterium coprostanoligenes group	rs76898927	G	A	0.123055	0.0266375	4.78983e-06	-0.00952516	0.0245317	0.697808
Eubacterium coprostanoligenes group	rs9648214	T	C	-0.0828719	0.016431	2.52029e-07	-0.0148086	0.0156389	0.343688
Eubacterium eligens group	rs265534	T	G	-0.0563756	0.0120127	2.26757e-06	0.00352642	0.0106041	0.739472
Eubacterium eligens group	rs4583233	A	C	0.0670205	0.0128122	2.83851e-07	-0.000760244	0.0110543	0.94517
Eubacterium eligens group	rs6923695	T	G	0.103268	0.0229525	4.87405e-06	0.0303841	0.0193523	0.116403
Eubacterium fissicatena group	rs11876297	T	C	0.131469	0.0281712	2.66557e-06	0.0135798	0.0121191	0.262487
Eubacterium fissicatena group	rs151257695	A	G	0.20951	0.0454847	3.09678e-06	0.00181994	0.0204263	0.929004
Eubacterium fissicatena group	rs2733072	G	A	0.109644	0.0228306	1.49091e-06	0.0174839	0.0106606	0.100995
Eubacterium fissicatena group	rs3771393	T	C	-0.130842	0.0266671	7.37904e-07	-0.0149933	0.0118705	0.206561
Eubacterium fissicatena group	rs7104872	G	A	0.138612	0.0291906	2.73149e-06	-0.00822586	0.0134973	0.542229
Eubacterium hallii group	rs10798999	C	T	0.0601661	0.0126752	2.60555e-06	0.00931948	0.0127302	0.464121
Eubacterium hallii group	rs10808115	C	A	0.0504747	0.0109922	4.42446e-06	0.00850813	0.0105344	0.41929
Eubacterium hallii group	rs13116360	T	C	0.154124	0.0297185	2.9449e-07	0.0531944	0.0227978	0.0196318
Eubacterium hallii group	rs28584818	A	G	0.126115	0.0268627	4.43231e-06	-0.00409176	0.0237377	0.863144
Eubacterium hallii group	rs60254196	G	A	0.0522832	0.0111865	2.69675e-06	-0.00202808	0.010528	0.847243
Eubacterium hallii group	rs6550770	C	T	0.198087	0.0443545	4.82303e-06	0.0202526	0.0234126	0.387023
Eubacterium hallii group	rs74018587	C	T	0.208943	0.043822	3.70254e-06	-0.0201179	0.0294181	0.494061
Eubacterium hallii group	rs949971	T	G	-0.0540164	0.0116101	3.29003e-06	0.0223324	0.0108378	0.0393414
Eubacterium nodatum group	rs34297067	A	G	-0.186907	0.0341475	6.59781e-08	-0.0440163	0.0146189	0.00260459
Eubacterium nodatum group	rs61841040	G	T	0.160621	0.0341609	3.56139e-06	-0.0108233	0.0146289	0.459387
Eubacterium nodatum group	rs77910827	C	T	0.201788	0.0413568	9.05378e-07	0.0300141	0.0174425	0.0852963
Eubacterium oxidoreducens group	rs12423772	G	T	0.14098	0.0295029	2.62924e-06	-0.0150287	0.0165156	0.362837
Eubacterium oxidoreducens group	rs2973294	G	T	0.0923559	0.0195439	2.38836e-06	0.00039113	0.0105762	0.970499
Eubacterium oxidoreducens group	rs34561138	G	A	0.216145	0.045992	2.51166e-06	0.0236485	0.0207737	0.254958
Eubacterium rectale group	rs10248854	C	A	-0.0527827	0.0113464	4.20678e-06	-0.00506362	0.0109658	0.644249
Eubacterium rectale group	rs10797540	A	G	0.0503179	0.0108389	3.53387e-06	0.00525903	0.0105924	0.619549
Eubacterium rectale group	rs314726	T	C	0.0528824	0.0109486	1.37965e-06	0.00788114	0.0106336	0.458599
Eubacterium rectale group	rs35398954	A	G	-0.0901402	0.0174602	5.39946e-07	-0.0206337	0.0167959	0.219259
Eubacterium ruminantium group	rs10131724	C	A	0.199832	0.0414577	2.38666e-06	0.00221417	0.0224679	0.921497
Eubacterium ruminantium group	rs139749	C	T	-0.0845439	0.0171791	8.58836e-07	-0.000193812	0.0111269	0.986103
Eubacterium ruminantium group	rs16891896	G	A	-0.174787	0.0390573	2.38122e-06	-0.0217559	0.0240942	0.366551
Eubacterium ruminantium group	rs17519472	C	T	0.107804	0.0233984	4.7036e-06	-0.0129675	0.0149016	0.384187
Eubacterium ruminantium group	rs2116427	A	G	0.0911461	0.0182353	4.67369e-07	0.0109873	0.0122413	0.369419
Eubacterium ruminantium group	rs2229917	A	G	0.153538	0.0323922	2.15894e-06	0.0051208	0.0216627	0.813132
Eubacterium ruminantium group	rs57340348	T	C	-0.0979429	0.0212166	4.93276e-06	0.0238286	0.0134	0.0753633
Eubacterium ruminantium group	rs606117	G	A	-0.0833243	0.018056	4.81637e-06	0.00998302	0.0113899	0.380768
Eubacterium ruminantium group	rs7000472	G	A	0.0762282	0.016523	4.06846e-06	-0.00165909	0.0107379	0.87721
Eubacterium ruminantium group	rs72836424	C	T	-0.139825	0.030069	2.62126e-06	0.0347412	0.0184189	0.0592721
Eubacterium ventriosum group	rs11617697	A	G	-0.143349	0.0286241	7.21755e-07	-0.0205544	0.0245649	0.402739
Eubacterium ventriosum group	rs12964517	G	A	0.0587198	0.0123453	2.07501e-06	0.0158113	0.0112137	0.15854
Eubacterium ventriosum group	rs16884680	G	T	-0.0906428	0.0191909	1.73968e-06	-0.000853205	0.0180947	0.962392
Eubacterium ventriosum group	rs3809430	T	C	-0.0548171	0.0118426	3.5532e-06	0.00108863	0.0108286	0.919921
Eubacterium ventriosum group	rs57199565	T	C	0.0783394	0.0160257	7.9704e-07	-0.00492025	0.0136901	0.719293
Eubacterium ventriosum group	rs73615400	T	C	-0.0956303	0.0193428	9.53608e-07	-0.00400351	0.0186089	0.829659
Eubacterium ventriosum group	rs78250280	G	A	0.0749762	0.0164404	3.35792e-06	-0.0104509	0.0144765	0.470342
Eubacterium ventriosum group	rs876734	T	C	0.0618696	0.0132532	2.88908e-06	-0.0113578	0.0120904	0.347519
Eubacterium xylanophilum	rs10140184	A	C	0.0576795	0.012599	4.95861e-06	-3.40179e-05	0.0108511	0.997499
Eubacterium xylanophilum	rs10917203	A	C	0.0612633	0.0130917	3.15152e-06	0.0282555	0.0111308	0.0111332
Eubacterium xylanophilum	rs112176119	C	T	-0.113455	0.0245762	3.32767e-06	-0.0308813	0.0192755	0.109134
Eubacterium xylanophilum	rs13239072	G	A	0.0687427	0.0142728	1.81782e-06	0.00763285	0.0119354	0.522488
Eubacterium xylanophilum	rs17830032	G	A	-0.160597	0.0310515	2.38891e-07	0.0389109	0.0231968	0.0934588
Eubacterium xylanophilum	rs1999224	G	T	-0.0949051	0.0203503	3.75491e-06	0.00509778	0.0178174	0.774792
Eubacterium xylanophilum	rs2213117	T	G	0.0877797	0.0189012	4.21328e-06	0.0132569	0.0166653	0.426335
Faecalibacterium	rs1271565	C	T	-0.0576251	0.0119649	1.3017e-06	0.0113408	0.0117905	0.33612
Faecalibacterium	rs6910935	G	A	-0.134864	0.0277032	1.37848e-06	-0.0288299	0.0219469	0.188974
Faecalibacterium	rs75499067	C	T	0.227585	0.0465522	1.76449e-06	-0.0311255	0.0238945	0.192705
Family XIII AD3011 group	rs12812672	T	C	-0.096065	0.020828	2.55806e-06	0.0104903	0.0181484	0.563246
Family XIII AD3011 group	rs16840310	G	A	0.0608052	0.0122149	6.75118e-07	-0.00878386	0.0109615	0.422938
Family XIII AD3011 group	rs16940167	C	T	0.0732552	0.0159898	3.90841e-06	0.00140416	0.0145016	0.922863
Family XIII AD3011 group	rs17156849	G	A	-0.112891	0.0245292	4.1917e-06	0.0163101	0.0200801	0.416647
Family XIII AD3011 group	rs62029761	A	G	0.128753	0.0276002	3.89081e-06	-0.00823035	0.0215547	0.702584
Family XIII AD3011 group	rs62200412	C	T	-0.0800851	0.0163834	5.80216e-07	0.00216017	0.0142207	0.879263
Family XIII AD3011 group	rs72730932	C	A	-0.0899559	0.0177107	6.88763e-07	-0.0259317	0.0145172	0.0740543
Family XIII UCG001	rs12049454	T	C	-0.0647298	0.0134065	1.17379e-06	-0.0149206	0.0113788	0.18977
Family XIII UCG001	rs1426266	C	T	0.0665521	0.0137151	1.24934e-06	-0.00870681	0.0114706	0.447818
Family XIII UCG001	rs62414802	C	T	-0.0611904	0.013457	4.29181e-06	0.0054226	0.0110638	0.624048
Family XIII UCG001	rs7119679	G	A	-0.0809085	0.0174782	3.52493e-06	-0.0106471	0.0150089	0.478085
Family XIII UCG001	rs76463770	A	G	0.19313	0.0419866	3.77477e-06	0.00822286	0.0248411	0.740631
Flavonifractor	rs11811696	T	C	-0.116063	0.0241012	2.07348e-06	-0.0147795	0.0183296	0.420061
Flavonifractor	rs12030302	G	A	0.0692276	0.0137467	5.60841e-07	0.0125474	0.0105691	0.235157
Flavonifractor	rs34066017	A	G	0.0764294	0.0159789	1.52086e-06	-0.0170843	0.0119241	0.151929
Flavonifractor	rs806808	C	T	-0.0667272	0.0136557	1.17972e-06	0.0037385	0.0105005	0.721817
Fusicatenibacter	rs1864685	A	C	-0.0494799	0.0108105	4.96158e-06	-0.00253386	0.0105037	0.809373
Fusicatenibacter	rs2025938	G	A	-0.0967298	0.0205426	2.98834e-06	-0.00835776	0.0190104	0.660196
Fusicatenibacter	rs2132128	G	A	-0.0771914	0.0160344	1.07686e-06	-0.0116562	0.0157297	0.458674
Fusicatenibacter	rs3303	T	C	-0.0953657	0.020407	3.93895e-06	-0.00373066	0.0188258	0.842914
Fusicatenibacter	rs4378146	A	C	-0.0616691	0.0125259	7.20444e-07	-0.00119777	0.0120567	0.920864
Fusicatenibacter	rs62187631	T	C	-0.0710571	0.015924	4.54527e-06	0.00471505	0.0144481	0.744165
Fusicatenibacter	rs62353480	A	G	-0.0701397	0.0145589	1.56769e-06	-0.00814212	0.0135876	0.549017
Fusicatenibacter	rs704418	C	T	-0.0739124	0.0151073	7.77428e-07	-0.0170864	0.0143286	0.23308
Fusicatenibacter	rs8063430	T	C	-0.104026	0.022217	4.9289e-06	0.00381409	0.0227418	0.866809
Gordonibacter	rs322296	G	A	0.17869	0.037722	4.0242e-06	0.0324014	0.0161787	0.0452064
Gordonibacter	rs72714787	C	A	0.181405	0.0377102	1.42889e-06	0.0136988	0.0175459	0.434955
Gordonibacter	rs7294633	T	C	-0.12867	0.0249946	3.43764e-07	0.015379	0.0115364	0.182502
Haemophilus	rs10781340	A	G	-0.0948915	0.0203221	4.32265e-06	-0.00102567	0.0139948	0.941576
Haemophilus	rs111582866	G	A	-0.124265	0.026016	1.27347e-06	0.023995	0.017029	0.158815
Haemophilus	rs35509	G	A	0.128249	0.0268779	2.00951e-06	-0.00880223	0.0179334	0.623547
Haemophilus	rs4822728	T	C	0.0705861	0.0151388	3.47848e-06	-0.0171227	0.010825	0.113701
Haemophilus	rs76022354	C	T	0.244638	0.0505504	1.83033e-06	-0.00171295	0.0251511	0.945701
Haemophilus	rs78909003	T	C	-0.246256	0.0503924	1.66744e-06	-0.0238669	0.0235567	0.31098
Haemophilus	rs9328464	T	C	0.0723095	0.0148799	1.42269e-06	-0.000542405	0.0104881	0.958755
Haemophilus	rs9382510	C	T	-0.093521	0.0172649	7.12049e-08	-0.00115813	0.0124092	0.925643
Haemophilus	rs9895850	T	C	-0.192957	0.0416755	2.14062e-06	0.00204216	0.0238423	0.931742
Holdemanella	rs12513188	G	A	0.0903906	0.0195276	4.65479e-06	0.000775712	0.0133041	0.953505
Holdemanella	rs4541991	T	C	-0.0927334	0.0194435	2.10092e-06	0.00503478	0.0127345	0.692574
Holdemanella	rs607782	C	T	0.0854214	0.0172515	7.19449e-07	0.0109408	0.0109895	0.31946
Holdemanella	rs73011279	T	C	-0.0961669	0.0199336	1.36044e-06	-0.0252771	0.0127069	0.0466756
Holdemanella	rs75764681	T	C	-0.283103	0.0598999	1.94272e-06	-0.0248497	0.0246563	0.31353
Holdemanella	rs8113760	G	A	0.078999	0.01734	4.62392e-06	0.00618021	0.0109773	0.573436
Holdemania	rs111745969	A	G	0.120677	0.0265781	3.70775e-06	-0.0035717	0.0176187	0.839352
Holdemania	rs116500994	G	T	-0.13755	0.0293386	2.34477e-06	0.0577427	0.0203366	0.00452054
Holdemania	rs1867876	T	C	0.0842919	0.0162192	2.7388e-07	0.0126838	0.011634	0.275607
Holdemania	rs6133067	T	C	0.0910829	0.0178561	5.16928e-07	0.015608	0.0126003	0.215456
Holdemania	rs77293403	A	G	0.164556	0.0341775	1.77468e-06	0.00977168	0.0216462	0.651681
Holdemania	rs9500080	C	T	0.0926764	0.0178886	4.08517e-07	0.00496861	0.0126381	0.694212
Howardella	rs12452946	A	G	-0.105833	0.0228941	3.80391e-06	-0.00423609	0.0105252	0.687337
Howardella	rs1484873	G	A	0.227831	0.046335	2.55918e-06	-0.0356175	0.023352	0.127198
Howardella	rs17167098	G	A	-0.169366	0.0352068	1.12323e-06	0.0153182	0.0149628	0.305952
Howardella	rs36081916	T	C	-0.18123	0.0402987	4.70046e-06	-0.0147039	0.0173045	0.395482
Howardella	rs609430	T	G	-0.112045	0.0239328	3.34488e-06	-0.00102861	0.0111041	0.926195
Howardella	rs672217	G	A	0.164146	0.0349993	3.52468e-06	-0.0290145	0.0156733	0.0641402
Howardella	rs901099	T	G	-0.12718	0.0250924	6.5286e-07	-0.000996146	0.011403	0.930387
Intestinibacter	rs10805326	A	G	-0.0775151	0.0139665	3.54544e-08	0.00791548	0.0113788	0.486656
Intestinibacter	rs118030283	G	A	-0.151829	0.0324471	2.67436e-06	0.00413558	0.0230207	0.85743
Intestinibacter	rs16938435	T	C	-0.112189	0.0235439	1.80098e-06	0.0131893	0.019964	0.508835
Intestinibacter	rs2702387	G	A	-0.0608559	0.0132145	4.25991e-06	-0.000844871	0.0111123	0.939395
Intestinibacter	rs4327025	G	A	-0.0810346	0.0154397	1.64327e-07	0.0180958	0.012687	0.153775
Intestinibacter	rs478972	C	T	0.142681	0.0297116	1.81991e-06	-0.0394975	0.0241684	0.102204
Intestinibacter	rs6875660	C	T	0.0890455	0.0193905	3.05781e-06	-0.00338583	0.0167384	0.839699
Intestinimonas	rs10262702	T	C	0.0918017	0.0194885	2.06072e-06	-0.0237675	0.015932	0.135751
Intestinimonas	rs11258178	A	G	0.0660742	0.0134139	6.982e-07	-0.0235008	0.0108785	0.0307503
Intestinimonas	rs12226153	A	G	-0.151142	0.0306922	5.12165e-07	0.0524679	0.0222175	0.0181983
Intestinimonas	rs1859797	G	A	0.060368	0.0131793	4.1223e-06	-0.00418025	0.01054	0.691657
Intestinimonas	rs2731794	C	T	0.120632	0.0257529	1.91743e-06	0.0309166	0.0206496	0.134341
Intestinimonas	rs2930225	T	G	-0.0729524	0.0152948	1.34623e-06	0.00244982	0.0118593	0.836342
Intestinimonas	rs4784055	T	C	-0.175324	0.038599	8.71806e-07	-0.0156714	0.0263907	0.552629
Intestinimonas	rs62240188	G	A	0.130074	0.0267179	2.20308e-06	-0.0508321	0.0195681	0.00938491
Intestinimonas	rs716604	A	G	0.0818068	0.0165992	8.56624e-07	-0.000567337	0.0137034	0.966976
Intestinimonas	rs7170984	T	C	-0.0658116	0.0140767	2.98353e-06	-0.00710127	0.0114179	0.533981
Intestinimonas	rs72982915	C	T	0.183158	0.0402743	4.91157e-06	0.014819	0.0249491	0.552533
Lachnoclostridium	rs4738679	A	G	0.0520267	0.011404	4.41754e-06	-0.0167631	0.0111437	0.132514
Lachnoclostridium	rs6112314	A	C	-0.0561715	0.0108174	2.43215e-07	-0.00314726	0.010793	0.770591
Lachnoclostridium	rs615997	T	C	0.0511752	0.0106491	2.0268e-06	-0.0259979	0.0105286	0.0135394
Lachnoclostridium	rs62285313	A	G	0.0864203	0.0181565	1.58332e-06	-0.0127901	0.0170786	0.453919
Lachnoclostridium	rs78068103	A	G	0.0886199	0.0194248	3.66522e-06	-0.017467	0.0205818	0.396067
Lachnoclostridium	rs789029	C	T	-0.0641288	0.0137974	3.75327e-06	-0.00390025	0.0139659	0.780038
Lachnospiraceae FCS020 group	rs10093861	G	A	-0.0568869	0.0121152	3.05626e-06	0.00836573	0.0104981	0.42552
Lachnospiraceae FCS020 group	rs1363769	C	T	0.200628	0.0449372	1.58161e-06	0.0221609	0.0237284	0.350335
Lachnospiraceae FCS020 group	rs2862811	C	T	-0.0564927	0.0121736	3.91913e-06	-0.0132693	0.0105584	0.208841
Lachnospiraceae FCS020 group	rs35035870	T	C	-0.190615	0.0414403	2.62029e-06	0.0277043	0.025319	0.273863
Lachnospiraceae FCS020 group	rs7249113	G	A	0.0679483	0.0133496	3.721e-07	-0.00218296	0.0116142	0.850912
Lachnospiraceae FCS020 group	rs72793667	A	G	-0.116881	0.0246589	1.63422e-06	-0.0130966	0.0191959	0.495074
Lachnospiraceae FCS020 group	rs9788306	C	T	-0.062804	0.0130744	1.38618e-06	0.00372696	0.0114515	0.744837
Lachnospiraceae NC2004 group	rs12127733	G	A	0.115182	0.0246006	3.10592e-06	-0.0195216	0.0139175	0.160717
Lachnospiraceae NC2004 group	rs3756315	A	G	-0.0883469	0.0188397	3.32583e-06	-0.0239719	0.011274	0.0334773
Lachnospiraceae NC2004 group	rs6116753	G	A	0.0994748	0.0209139	2.92247e-06	0.0260519	0.01196	0.0293873
Lachnospiraceae NK4A136	rs160061	G	A	-0.0513831	0.0108094	2.12197e-06	-0.0119988	0.0105154	0.253839
Lachnospiraceae NK4A136	rs68104925	T	C	-0.0549104	0.0115385	2.36777e-06	-0.00548753	0.0109853	0.617403
Lachnospiraceae NK4A136	rs73044693	A	G	-0.10758	0.0229884	3.57256e-06	0.0116433	0.0189101	0.53808
Lachnospiraceae NK4A136	rs7616165	G	T	-0.230542	0.0483465	2.77389e-06	0.0135289	0.0242781	0.577359
Lachnospiraceae NK4A136	rs76193507	A	G	-0.22973	0.0499776	2.93089e-06	-0.019894	0.0254049	0.433581
Lachnospiraceae NK4A136	rs7832116	A	G	-0.0714756	0.0151703	3.57084e-06	-0.022195	0.0149953	0.138839
Lachnospiraceae NK4A136	rs954878	A	G	-0.0520656	0.0109082	1.78201e-06	0.0274497	0.010567	0.00938534
Lachnospiraceae UCG001	rs2050911	G	A	0.0751466	0.0153934	1.10647e-06	0.00158565	0.0115336	0.890651
Lachnospiraceae UCG001	rs437876	T	C	0.0784637	0.0144768	7.16556e-08	0.00398599	0.0108895	0.714335
Lachnospiraceae UCG001	rs573933	T	C	-0.107898	0.0232346	3.10506e-06	-0.0198636	0.0183801	0.279825
Lachnospiraceae UCG001	rs74034332	G	A	0.168045	0.0382637	3.3335e-06	-0.0302779	0.0244499	0.215581
Lachnospiraceae UCG001	rs78848836	A	G	-0.118868	0.0259753	3.38174e-06	0.0204241	0.0181163	0.259579
Lachnospiraceae UCG001	rs9403580	C	T	0.107801	0.0229777	3.46785e-06	-0.0130236	0.0173897	0.453904
Lachnospiraceae UCG001	rs985416	T	C	-0.0970258	0.0181807	1.45589e-07	-0.0297061	0.0132514	0.0249787
Lachnospiraceae UCG004	rs11128180	A	G	0.0648288	0.0140126	4.51742e-06	0.0200996	0.0123568	0.103821
Lachnospiraceae UCG004	rs12673420	G	A	0.0554351	0.0118375	2.98078e-06	-0.00861016	0.0106341	0.41813
Lachnospiraceae UCG004	rs12747809	A	G	0.062197	0.0125685	8.64868e-07	-0.00908513	0.0112934	0.421127
Lachnospiraceae UCG004	rs12894272	G	A	-0.0579792	0.0125229	4.3395e-06	-0.00410686	0.0111879	0.713559
Lachnospiraceae UCG004	rs2444793	T	C	0.0542433	0.0118188	4.77079e-06	0.00751	0.0105306	0.475748
Lachnospiraceae UCG004	rs2882478	G	A	-0.0577091	0.0118338	1.20812e-06	-0.0207185	0.0105964	0.0505534
Lachnospiraceae UCG004	rs35182105	A	G	-0.109724	0.024221	4.86508e-06	-0.0154937	0.0204282	0.448184
Lachnospiraceae UCG008	rs10741777	T	C	-0.0973842	0.0194791	7.68652e-07	0.0105064	0.0123347	0.394337
Lachnospiraceae UCG008	rs10793103	T	C	-0.0974344	0.0181279	9.34932e-08	-0.00278725	0.0113619	0.806212
Lachnospiraceae UCG008	rs10801803	G	A	-0.117029	0.0243085	1.4003e-06	0.00928906	0.0155417	0.550049
Lachnospiraceae UCG008	rs13024781	T	C	-0.0798769	0.0168846	2.29166e-06	-0.00850659	0.0105641	0.420682
Lachnospiraceae UCG008	rs57091572	A	G	-0.110443	0.0235801	2.85825e-06	0.0166572	0.0144114	0.247748
Lachnospiraceae UCG008	rs62277846	C	T	0.102292	0.0212319	1.58891e-06	-0.0090296	0.0131899	0.493607
Lachnospiraceae UCG008	rs67078837	T	C	-0.0845848	0.0170693	7.68192e-07	-0.00118021	0.0105307	0.910765
Lachnospiraceae UCG008	rs955844	A	C	0.112064	0.0228369	1.80992e-06	-0.0173381	0.0141945	0.22191
Lachnospiraceae UCG010	rs10414815	C	T	-0.10453	0.0230253	4.23975e-06	-0.0143427	0.0163048	0.379044
Lachnospiraceae UCG010	rs11192447	A	G	0.126592	0.024345	4.68954e-07	-0.000761056	0.0220168	0.972425
Lachnospiraceae UCG010	rs12346653	C	T	0.0657686	0.0139569	2.70321e-06	-0.00695786	0.0123106	0.571942
Lachnospiraceae UCG010	rs74315802	G	T	0.0867262	0.0183477	3.19007e-06	-0.00732013	0.015053	0.626761
Lachnospiraceae UCG010	rs9981767	A	C	0.0655062	0.0131994	9.96369e-07	-0.00757358	0.0112804	0.50197
Lactobacillus	rs11674854	C	T	-0.0852686	0.0176504	1.59199e-06	0.0315669	0.0107156	0.00322025
Lactobacillus	rs1530559	G	A	0.0804001	0.0178207	4.93106e-06	0.0128397	0.0107901	0.234067
Lactobacillus	rs16861661	G	A	-0.183147	0.038148	1.27809e-06	0.0249623	0.0204785	0.222861
Lactobacillus	rs62314653	C	A	0.187692	0.0394585	2.24383e-06	-0.00756677	0.0234588	0.747032
Lactobacillus	rs7399658	G	A	-0.107134	0.0221883	3.12097e-06	0.00397556	0.0129528	0.758899
Lactobacillus	rs768253	T	G	-0.079195	0.0171791	4.24766e-06	-0.0251586	0.0107801	0.019606
Lactobacillus	rs921925	A	C	0.0985077	0.0203229	9.71673e-07	-0.0269841	0.0130234	0.0382684
Lactococcus	rs10417872	G	T	-0.118306	0.024522	1.28677e-06	0.0184102	0.0117836	0.118204
Lactococcus	rs123059	C	T	0.13671	0.0274694	1.26561e-06	-0.00821847	0.0124805	0.510212
Lactococcus	rs2293361	C	T	-0.199221	0.0430969	1.39592e-06	0.0103516	0.0220793	0.639184
Lactococcus	rs4766997	C	T	0.114599	0.023839	2.06144e-06	0.037954	0.0113744	0.000847501
Lactococcus	rs55910161	C	T	0.146426	0.0307367	2.36211e-06	0.0186407	0.0144174	0.196037
Lactococcus	rs7992246	C	T	-0.104232	0.0230786	4.44723e-06	0.0105927	0.0109143	0.331784
Marvinbryantia	rs1187983	C	T	-0.0935456	0.0193174	2.02428e-06	-0.00115385	0.0152634	0.939741
Marvinbryantia	rs2724813	G	A	0.0840769	0.0167551	6.28449e-07	-0.00117026	0.0137584	0.932215
Marvinbryantia	rs2842896	C	T	-0.0649396	0.0131146	7.25371e-07	-0.00458065	0.0106003	0.66565
Marvinbryantia	rs2863363	G	A	-0.0634861	0.0136323	3.11279e-06	-0.00802576	0.01092	0.462366
Marvinbryantia	rs61884471	G	A	0.124426	0.0248431	1.01163e-06	0.0107423	0.0199998	0.591183
Marvinbryantia	rs72948274	A	C	-0.126354	0.0272212	3.25912e-06	0.0284002	0.0224278	0.205408
Methanobrevibacter	rs10202904	G	T	0.112811	0.0239106	3.08546e-06	0.00633623	0.0106654	0.55245
Methanobrevibacter	rs76029318	T	C	0.222849	0.0454319	1.07552e-06	0.0203301	0.0201966	0.314121
Methanobrevibacter	rs894996	C	A	0.214213	0.0456045	3.81566e-06	0.0220193	0.0197755	0.265509
Odoribacter	rs10093869	A	G	-0.0577795	0.0125389	3.67443e-06	-0.0251281	0.0111247	0.0238985
Odoribacter	rs28417404	A	G	-0.0726896	0.0161372	3.68036e-06	0.00116216	0.0143421	0.935417
Odoribacter	rs77779484	G	A	-0.133489	0.0268526	6.56251e-07	0.0354908	0.0229355	0.121762
Olsenella	rs1035588	A	G	-0.108148	0.0236848	4.85501e-06	-0.00799839	0.010922	0.463974
Olsenella	rs17148768	G	A	0.140434	0.0295602	2.19842e-06	-0.000174539	0.013345	0.989565
Olsenella	rs2759329	A	G	0.111131	0.0237218	3.43202e-06	-0.0118184	0.0107919	0.273467
Olsenella	rs35225860	A	G	-0.223604	0.0482391	3.87044e-06	-0.0136915	0.0214575	0.523423
Olsenella	rs6046522	C	T	0.122938	0.0269928	4.48456e-06	-0.010699	0.0121035	0.376716
Olsenella	rs62112538	C	T	-0.19943	0.0407033	1.1882e-06	0.00212511	0.0191735	0.911746
Olsenella	rs72691585	C	A	-0.249079	0.0520814	2.95291e-06	0.00920744	0.0231893	0.691328
Oscillibacter	rs11627628	T	C	0.143961	0.0290223	1.00921e-06	0.0158292	0.0198231	0.424569
Oscillibacter	rs11990279	T	C	-0.0824934	0.0180457	4.94299e-06	-0.0303612	0.0123269	0.0137781
Oscillibacter	rs12649930	T	G	0.121589	0.0259612	4.09383e-06	-0.0216097	0.0188399	0.251374
Oscillibacter	rs133832	A	C	-0.0795527	0.0162411	1.1472e-06	0.0028876	0.011223	0.796952
Oscillibacter	rs16866406	A	G	0.0988765	0.0208795	3.07822e-06	-0.0192158	0.0153439	0.210443
Oscillibacter	rs16934185	A	G	-0.129568	0.028157	4.38036e-06	-0.0100935	0.0183311	0.581893
Oscillibacter	rs234108	A	G	0.0749553	0.0152632	9.16326e-07	0.03142	0.0105158	0.00280918
Oscillibacter	rs36095275	C	T	-0.0752368	0.0156861	1.39627e-06	-0.00173998	0.0108745	0.872877
Oscillibacter	rs4506202	G	A	0.0711323	0.0152261	3.20826e-06	0.000870217	0.0105584	0.934313
Oscillibacter	rs61883564	A	G	-0.101351	0.0221016	3.38712e-06	0.0297113	0.0153099	0.0522998
Oscillibacter	rs761240	G	T	0.17664	0.0388812	2.0384e-06	0.0130606	0.0200005	0.513747
Oscillibacter	rs9393920	G	A	0.0744662	0.0151081	9.92247e-07	0.0167613	0.0105104	0.110772
Oscillospira	rs12206468	G	A	-0.133016	0.0269733	1.04222e-06	0.0121825	0.0196334	0.534931
Oscillospira	rs1954532	C	T	0.0826246	0.0175252	2.26772e-06	-0.000992945	0.0131811	0.939951
Oscillospira	rs28889936	A	C	0.114051	0.0252838	3.36589e-06	-0.0417117	0.0202532	0.0394457
Oxalobacter	rs10464997	G	A	0.137691	0.0294804	3.29754e-06	-0.0188635	0.0154411	0.221844
Oxalobacter	rs11108500	A	G	-0.199099	0.0427327	3.74283e-06	0.00719104	0.0209199	0.73104
Oxalobacter	rs12002250	A	C	0.217122	0.0466317	1.41504e-06	-0.0237372	0.0228713	0.299335
Oxalobacter	rs1569853	T	C	-0.138078	0.0296981	3.64502e-06	-0.00209372	0.0145623	0.885677
Oxalobacter	rs36057338	G	T	0.207847	0.0421439	8.79812e-07	0.0203697	0.0206457	0.323823
Oxalobacter	rs4428215	G	A	0.130293	0.0242237	7.51069e-08	-0.0479014	0.0126605	0.000154611
Oxalobacter	rs6000536	C	T	-0.130992	0.0253804	2.06054e-07	-0.00762549	0.0131918	0.563233
Oxalobacter	rs736744	T	C	-0.117882	0.0211262	2.57472e-08	-0.00973879	0.0107566	0.365266
Parabacteroides	rs115602804	G	A	0.10308	0.0222736	1.93059e-06	0.0288427	0.0229265	0.208372
Parabacteroides	rs4236095	A	G	-0.0761961	0.0157042	1.93143e-06	-0.0134923	0.0151442	0.372971
Parabacteroides	rs60884758	C	T	-0.0702667	0.0142249	5.7069e-07	0.0105166	0.0139016	0.449345
Paraprevotella	rs140997932	T	C	-0.162376	0.0354178	2.1112e-06	-0.0222566	0.0203159	0.273286
Paraprevotella	rs145020347	A	G	-0.12465	0.0262323	4.03005e-06	0.0317388	0.0163014	0.0515347
Paraprevotella	rs17785622	A	G	0.248065	0.0524304	1.92659e-06	0.00445734	0.0219053	0.838758
Paraprevotella	rs2081023	A	G	-0.122561	0.0236507	2.63797e-07	0.00352189	0.0162219	0.828125
Paraprevotella	rs3008582	T	C	0.10572	0.0227246	4.35993e-06	-0.0126675	0.0146674	0.38778
Paraprevotella	rs4756632	G	T	-0.138905	0.0289897	3.81751e-06	0.00650767	0.0199229	0.743938
Paraprevotella	rs4767113	C	T	0.0882466	0.018382	2.14358e-06	-0.0146986	0.0114717	0.200091
Paraprevotella	rs9602779	A	C	-0.106692	0.0220264	6.9274e-07	-0.00959834	0.0134226	0.474554
Paraprevotella	rs9900242	A	G	-0.0852967	0.0175212	1.14067e-06	0.00909042	0.0106576	0.393688
Parasutterella	rs10899911	A	G	-0.0717102	0.0148151	1.15271e-06	0.00429641	0.0116677	0.712702
Parasutterella	rs2090816	C	A	-0.0840967	0.0177315	2.89714e-06	-0.0155171	0.0140999	0.271111
Parasutterella	rs2387977	T	C	-0.0681778	0.0134756	5.38481e-07	0.000341231	0.0108146	0.974829
Parasutterella	rs35055552	T	C	0.109554	0.0235433	3.3485e-06	-0.0137579	0.0174556	0.4306
Parasutterella	rs55877868	A	C	-0.104458	0.0228089	2.87071e-06	-0.00603912	0.0173059	0.727117
Parasutterella	rs6828768	C	T	0.0636852	0.0132645	1.78328e-06	-0.0118228	0.0104914	0.259783
Parasutterella	rs7303158	C	T	0.0646859	0.0134256	1.32776e-06	-0.00628631	0.0105827	0.5525
Parasutterella	rs7572229	A	G	-0.066273	0.0132736	6.31699e-07	0.00158913	0.0105155	0.879879
Parasutterella	rs78383039	T	C	-0.146315	0.0297119	1.57438e-06	0.0118066	0.0215572	0.583906
Parasutterella	rs8039785	G	T	-0.0618345	0.0133	3.62093e-06	-0.011773	0.0105252	0.263332
Parasutterella	rs823424	G	A	-0.0713448	0.0156958	4.95291e-06	0.00787826	0.0126407	0.533122
Peptococcus	rs10031059	C	T	0.121167	0.0225844	1.23637e-07	-0.00496359	0.0124371	0.689824
Peptococcus	rs11001941	G	A	-0.195611	0.0392217	1.32859e-06	0.0103703	0.0211483	0.62388
Peptococcus	rs2054133	A	G	-0.0895433	0.0188332	2.14166e-06	-0.00208713	0.0105493	0.843167
Peptococcus	rs413827	G	A	0.110229	0.0237523	3.30088e-06	0.0265193	0.0129437	0.040479
Peptococcus	rs5770862	T	C	0.162018	0.0356813	3.21959e-06	0.0199842	0.0198208	0.313337
Peptococcus	rs6918730	A	G	-0.135311	0.0289742	1.14731e-06	0.0172129	0.016646	0.301109
Peptococcus	rs7033353	G	T	-0.090152	0.018995	2.21958e-06	0.00543781	0.010721	0.612006
Peptococcus	rs77681628	C	T	0.200307	0.0387328	2.68838e-07	-0.0206066	0.0214572	0.336874
Phascolarctobacterium	rs12618201	A	G	0.0641657	0.0138202	3.37699e-06	0.0110966	0.010907	0.308974
Phascolarctobacterium	rs1264476	G	T	-0.0767335	0.0166041	4.29566e-06	0.0113414	0.0129315	0.380467
Phascolarctobacterium	rs56069061	G	A	-0.111306	0.0230694	1.87176e-06	-0.0152139	0.0170477	0.372162
Phascolarctobacterium	rs56157888	A	C	0.0954864	0.0193976	1.08505e-06	0.0015788	0.0143606	0.912457
Phascolarctobacterium	rs74540770	G	A	-0.121014	0.0258621	3.60272e-06	-0.0190665	0.0185285	0.303462
Phascolarctobacterium	rs75882962	T	C	0.0968661	0.0190575	3.18985e-07	0.00655909	0.0148681	0.659103
Prevotella7	rs2240542	C	T	0.12085	0.0261776	4.8415e-06	0.0409011	0.0116383	0.000440849
Prevotella7	rs430270	A	C	0.139155	0.0297055	2.86847e-06	-0.00244934	0.0132297	0.85312
Prevotella7	rs57404562	C	A	0.155486	0.0316057	6.2157e-07	0.00564572	0.013484	0.675437
Prevotella7	rs9608249	A	G	-0.158213	0.0336317	2.06685e-06	0.0204106	0.0148132	0.168246
Prevotella7	rs9959718	G	A	0.133012	0.0275361	1.9006e-06	-0.00292586	0.0120543	0.808219
Prevotella9	rs111509883	T	C	0.171131	0.0347624	1.24388e-06	0.0102405	0.0211348	0.628008
Prevotella9	rs11685699	C	T	-0.141357	0.0295665	2.02554e-06	0.00152829	0.01963	0.937944
Prevotella9	rs117271932	A	G	0.208089	0.0440393	2.81722e-06	0.00109474	0.023209	0.962379
Prevotella9	rs2683313	G	A	0.0724576	0.0151603	1.68896e-06	0.00869191	0.011213	0.438243
Prevotella9	rs746764	T	C	-0.0915771	0.0193245	2.04e-06	-0.00873794	0.0136791	0.522965
Prevotella9	rs9428102	A	G	-0.0778845	0.0176068	4.61732e-06	-0.00266099	0.0127555	0.834749
Rikenellaceae RC9 gut group	rs17582787	A	G	-0.157739	0.0339924	3.55378e-06	-0.029768	0.0149973	0.0471563
Rikenellaceae RC9 gut group	rs2900503	T	G	0.172329	0.0326671	1.55282e-07	0.000638583	0.014415	0.964665
Rikenellaceae RC9 gut group	rs2998141	C	T	0.136346	0.0293073	4.42374e-06	0.01342	0.0130211	0.302711
Rikenellaceae RC9 gut group	rs4717843	G	T	-0.119376	0.0260548	4.71726e-06	-0.00457037	0.0110321	0.678667
Rikenellaceae RC9 gut group	rs80309088	G	A	0.17405	0.0383423	4.55638e-06	-0.0272748	0.0161896	0.092045
Rikenellaceae RC9 gut group	rs9887954	G	A	-0.114849	0.0249013	4.80806e-06	0.00249593	0.0106574	0.814833
Romboutsia	rs10279978	A	G	-0.0622202	0.0127675	1.17009e-06	-0.00703104	0.0113353	0.535075
Romboutsia	rs61841503	G	A	0.092888	0.0171454	3.99595e-08	0.0245483	0.0138931	0.0772378
Romboutsia	rs62504452	A	G	-0.0710048	0.0156654	4.65833e-06	0.00833862	0.0137748	0.544944
Roseburia	rs16910295	T	C	-0.0980434	0.020957	2.91112e-06	-0.0191224	0.0201947	0.34369
Roseburia	rs2160994	C	T	-0.0550687	0.0112481	9.6984e-07	-0.0180775	0.0109746	0.099513
Roseburia	rs2943022	T	C	0.0493786	0.0106763	4.11405e-06	-0.0111429	0.0106363	0.294811
Roseburia	rs6445851	A	G	0.0497336	0.0108158	3.5272e-06	0.01977	0.0107536	0.0659948
Roseburia	rs6930661	C	T	-0.0961587	0.0204975	2.47942e-06	0.00839189	0.0200178	0.675055
Roseburia	rs9300744	C	T	-0.0588452	0.0126228	4.75116e-06	-0.0219785	0.0123756	0.0757408
Ruminiclostridium5	rs10827477	A	G	-0.0547387	0.0115163	2.1918e-06	-0.00704048	0.0112677	0.532078
Ruminiclostridium5	rs113753996	T	C	0.0820689	0.0174463	3.98896e-06	0.0230021	0.0179911	0.201064
Ruminiclostridium5	rs1492620	T	C	-0.0830505	0.0180073	3.52574e-06	0.010639	0.0179092	0.552475
Ruminiclostridium5	rs2482038	C	A	0.0518991	0.0108777	1.70314e-06	-0.0232716	0.0106128	0.028323
Ruminiclostridium5	rs6121460	G	A	0.0932955	0.0199206	2.64107e-06	-0.0137675	0.0205302	0.502476
Ruminiclostridium5	rs79968837	A	G	-0.0950311	0.0193507	1.14623e-06	0.0141767	0.0189041	0.453298
Ruminiclostridium6	rs10829821	T	C	-0.097606	0.0216072	3.47144e-06	0.00521123	0.0173857	0.764374
Ruminiclostridium6	rs11992182	A	C	0.0625299	0.0137876	4.64836e-06	0.00774295	0.0118098	0.512057
Ruminiclostridium6	rs1756364	G	T	0.0999189	0.0197169	2.53653e-07	-0.0126665	0.0175152	0.469573
Ruminiclostridium6	rs61060922	T	G	0.15913	0.0322283	1.08648e-06	0.00309599	0.0231936	0.89381
Ruminiclostridium6	rs663262	C	T	0.13498	0.0310715	3.39414e-06	-0.0358253	0.0231692	0.122045
Ruminiclostridium6	rs71414120	T	G	0.200894	0.0406434	1.07696e-06	0.0139393	0.0222882	0.5317
Ruminiclostridium6	rs72991535	T	G	0.135604	0.0295174	4.9537e-06	0.0434228	0.0227038	0.055802
Ruminiclostridium6	rs77193512	A	G	0.0736533	0.0153163	1.29587e-06	0.00723039	0.0133818	0.588979
Ruminiclostridium6	rs79968172	G	A	0.11614	0.0243083	1.66054e-06	-0.0249651	0.022598	0.269269
Ruminiclostridium9	rs115044523	G	A	-0.0980026	0.0202616	2.37203e-06	0.00443498	0.0187214	0.812739
Ruminiclostridium9	rs12040548	G	T	0.0570422	0.0122359	3.14869e-06	0.0158141	0.011778	0.179374
Ruminiclostridium9	rs6082461	C	A	-0.0586425	0.0131004	4.86598e-06	0.00207913	0.0128635	0.871597
Ruminiclostridium9	rs918449	G	A	0.0950908	0.0197177	2.55994e-06	0.0351802	0.02054	0.0867561
Ruminiclostridium9	rs9522712	T	C	0.0699728	0.0154939	4.65961e-06	0.0153032	0.014425	0.288745
Ruminococcaceae NK4A214 group	rs11586410	G	A	-0.0863422	0.0169937	3.66277e-07	0.0221323	0.0161654	0.170963
Ruminococcaceae NK4A214 group	rs12642039	C	T	0.0553003	0.0119397	3.43005e-06	-0.00617872	0.0110233	0.57513
Ruminococcaceae NK4A214 group	rs12731	A	G	-0.0527684	0.0115053	4.87237e-06	0.00712187	0.0105896	0.501244
Ruminococcaceae NK4A214 group	rs136761	A	G	0.0587521	0.0119155	8.15192e-07	0.000847703	0.0107808	0.937326
Ruminococcaceae NK4A214 group	rs147475196	A	G	-0.133769	0.0295196	4.72498e-06	-0.00929738	0.0224514	0.678792
Ruminococcaceae NK4A214 group	rs35559912	T	C	-0.0925071	0.0203674	4.89024e-06	-0.0143781	0.0195436	0.461918
Ruminococcaceae NK4A214 group	rs4814689	C	T	-0.1083	0.0230708	4.55187e-06	-0.00941261	0.0188687	0.617887
Ruminococcaceae NK4A214 group	rs5994253	A	G	-0.0811302	0.0157621	2.35185e-07	-0.0010071	0.0141727	0.943351
Ruminococcaceae NK4A214 group	rs7573569	T	C	0.107739	0.0233638	3.23139e-06	0.0311835	0.0224149	0.164167
Ruminococcaceae UCG002	rs10916131	C	T	-0.069333	0.0146753	2.87495e-06	-0.0288213	0.0145101	0.0470002
Ruminococcaceae UCG002	rs10927423	C	A	-0.0713617	0.0147712	8.49513e-07	0.0127137	0.0145697	0.382874
Ruminococcaceae UCG002	rs116974815	C	A	-0.189731	0.0396566	2.02516e-06	-0.0145369	0.0226559	0.521107
Ruminococcaceae UCG002	rs11750293	G	T	-0.0578304	0.0120512	1.76137e-06	0.00527726	0.0117324	0.652854
Ruminococcaceae UCG002	rs12463378	A	G	-0.0522061	0.0112086	2.95522e-06	0.0148118	0.0107705	0.169062
Ruminococcaceae UCG002	rs55793120	T	C	0.137396	0.027414	4.80673e-07	-0.00616587	0.0226177	0.785151
Ruminococcaceae UCG002	rs7120052	A	C	0.0624796	0.0135523	1.96897e-06	-0.0354785	0.0139015	0.0107068
Ruminococcaceae UCG002	rs7155595	C	A	0.0569929	0.0116986	1.14932e-06	0.0107363	0.0112048	0.337964
Ruminococcaceae UCG002	rs77564310	A	C	-0.0713093	0.0140855	3.28617e-07	-0.00828274	0.0131621	0.52916
Ruminococcaceae UCG002	rs79016051	C	T	-0.0887747	0.0189424	2.33744e-06	-0.0011847	0.0181215	0.947875
Ruminococcaceae UCG003	rs10490280	C	T	-0.0672094	0.0143309	4.15547e-06	-0.0154635	0.0122472	0.206729
Ruminococcaceae UCG003	rs11243416	T	C	-0.0925653	0.0191203	1.66882e-06	0.018567	0.0175442	0.28992
Ruminococcaceae UCG003	rs11613919	G	T	0.0727604	0.0155716	1.6251e-06	0.00989428	0.014274	0.488205
Ruminococcaceae UCG003	rs16959793	A	C	-0.062527	0.0131259	2.21707e-06	0.0186774	0.0117558	0.112111
Ruminococcaceae UCG003	rs3013089	G	A	-0.0551473	0.0120346	4.38137e-06	-0.00872349	0.0107043	0.4151
Ruminococcaceae UCG003	rs4452755	A	C	-0.0634463	0.0134741	3.29337e-06	0.0199189	0.0116855	0.0882714
Ruminococcaceae UCG003	rs4532474	G	A	0.0769231	0.017045	4.82125e-06	0.0151258	0.0156639	0.334221
Ruminococcaceae UCG003	rs646327	G	A	0.0586696	0.0118369	7.83177e-07	0.00103504	0.0105266	0.921673
Ruminococcaceae UCG003	rs6759615	A	G	0.102523	0.0200204	7.86231e-07	0.00920991	0.0199315	0.644024
Ruminococcaceae UCG003	rs73341549	T	C	-0.169857	0.0318768	1.50952e-07	-0.016158	0.0243105	0.506273
Ruminococcaceae UCG004	rs12125734	G	T	0.133972	0.0257416	2.09426e-07	0.0446801	0.0173859	0.0101726
Ruminococcaceae UCG004	rs511258	G	A	-0.0757474	0.0162475	4.52054e-06	-0.0121936	0.0117665	0.300061
Ruminococcaceae UCG004	rs6769553	A	G	0.0849743	0.0157451	7.91061e-08	0.0042525	0.0115635	0.713058
Ruminococcaceae UCG005	rs10873449	C	T	-0.0654843	0.0143973	4.11169e-06	-0.0144942	0.0141262	0.304865
Ruminococcaceae UCG005	rs10950694	C	T	-0.0577628	0.011412	4.29804e-07	-0.00513397	0.0106658	0.630269
Ruminococcaceae UCG005	rs114279581	A	G	-0.146604	0.0316034	3.21855e-06	0.0225852	0.0220519	0.30575
Ruminococcaceae UCG005	rs12288512	A	G	0.066635	0.0144356	3.10277e-06	-0.0166669	0.0129714	0.198829
Ruminococcaceae UCG005	rs12458218	T	C	0.0677322	0.0144525	2.41024e-06	-0.0100942	0.0140414	0.47221
Ruminococcaceae UCG005	rs2893871	G	A	-0.073644	0.015548	3.53843e-06	0.00171932	0.0146246	0.906413
Ruminococcaceae UCG005	rs34781347	G	A	0.188685	0.0386484	6.04728e-07	-0.0252135	0.0230744	0.274524
Ruminococcaceae UCG005	rs7449320	C	A	0.0599163	0.0130836	4.80773e-06	0.0057235	0.0126636	0.651295
Ruminococcaceae UCG005	rs7555878	G	A	-0.0586677	0.0125277	2.81022e-06	0.00544144	0.0119542	0.648972
Ruminococcaceae UCG009	rs12508214	C	T	-0.0774649	0.0168937	4.75488e-06	0.00168391	0.0109259	0.877514
Ruminococcaceae UCG009	rs1550196	A	G	-0.130842	0.0262478	1.13287e-06	-0.015289	0.0175755	0.384354
Ruminococcaceae UCG009	rs2058609	G	A	-0.0816464	0.017472	3.12486e-06	-0.00520562	0.0110267	0.636862
Ruminococcaceae UCG009	rs2192926	A	G	-0.089048	0.0192989	4.87742e-06	-0.00594493	0.0124335	0.632552
Ruminococcaceae UCG009	rs4079028	C	T	0.0915623	0.019936	3.28246e-06	0.0287465	0.0129048	0.025909
Ruminococcaceae UCG009	rs4708333	T	G	-0.084033	0.0174757	1.56246e-06	0.014467	0.011365	0.203038
Ruminococcaceae UCG010	rs12597105	A	G	-0.0670855	0.0144415	4.87304e-06	-0.00148952	0.0117717	0.899309
Ruminococcaceae UCG010	rs2820282	C	A	0.0592304	0.0125917	2.85384e-06	0.00995298	0.0105592	0.345891
Ruminococcaceae UCG010	rs682403	A	G	-0.0588161	0.0124671	2.36537e-06	0.0112677	0.010502	0.283308
Ruminococcaceae UCG010	rs6958419	C	T	-0.0585718	0.0124994	2.84165e-06	-0.0194446	0.0105223	0.06461
Ruminococcaceae UCG011	rs12636310	G	A	0.132725	0.0282037	2.81235e-06	-0.010711	0.0128493	0.404513
Ruminococcaceae UCG011	rs12724320	C	T	-0.120881	0.0249229	1.51985e-06	-0.0036416	0.011322	0.747725
Ruminococcaceae UCG011	rs1416041	A	C	-0.182339	0.0339898	7.04417e-08	0.00246859	0.015659	0.874735
Ruminococcaceae UCG011	rs2729556	T	C	0.109097	0.0233699	3.18676e-06	-0.00840532	0.0105181	0.424214
Ruminococcaceae UCG011	rs79113084	C	T	-0.152166	0.0317519	2.06125e-06	0.00426796	0.0139409	0.759492
Ruminococcaceae UCG011	rs9729514	G	A	-0.184934	0.0394616	2.36772e-06	0.0299269	0.0182061	0.10022
Ruminococcaceae UCG013	rs11581881	C	T	0.0661211	0.0144736	4.72585e-06	-0.000851305	0.0138142	0.950861
Ruminococcaceae UCG013	rs12189346	G	A	0.0684961	0.014558	1.67954e-06	-0.0116829	0.0147996	0.429875
Ruminococcaceae UCG013	rs12485353	G	A	-0.0607903	0.0130847	4.19382e-06	0.00407416	0.012923	0.752562
Ruminococcaceae UCG013	rs12781711	C	T	-0.0656129	0.0117477	2.553e-08	-0.00800304	0.0110428	0.468616
Ruminococcaceae UCG013	rs16918863	A	C	0.111491	0.0240157	4.15499e-06	0.00485064	0.0218862	0.824602
Ruminococcaceae UCG013	rs75088940	T	C	-0.0942968	0.0200712	2.55399e-06	-0.021103	0.0186312	0.257352
Ruminococcaceae UCG013	rs76973485	G	T	0.194976	0.0418213	3.34981e-06	-0.0329293	0.0227485	0.147747
Ruminococcaceae UCG014	rs10941294	C	T	-0.122057	0.0260017	2.39701e-06	-0.0123183	0.0205508	0.548902
Ruminococcaceae UCG014	rs115777838	T	C	-0.18835	0.0386643	4.62328e-07	-0.0141921	0.0243465	0.559946
Ruminococcaceae UCG014	rs12638134	T	G	0.0582548	0.0119657	1.21143e-06	-0.00905894	0.0107136	0.397802
Ruminococcaceae UCG014	rs56105232	G	A	0.139276	0.0299132	2.9128e-06	-0.00138789	0.0223079	0.950392
Ruminococcaceae UCG014	rs72809222	T	C	0.0671775	0.0139838	2.4119e-06	-0.00440541	0.0119686	0.712812
Ruminococcaceae UCG014	rs995642	C	T	0.060048	0.0126417	1.90222e-06	-0.00281535	0.0114648	0.806019
Ruminococcus gauvreauii group	rs10931481	A	G	-0.0610096	0.0130484	3.38213e-06	-0.00531177	0.0113047	0.638446
Ruminococcus gauvreauii group	rs12539819	C	T	0.110654	0.0240684	4.49376e-06	0.000238557	0.0180909	0.989479
Ruminococcus gauvreauii group	rs1391597	C	T	0.0590284	0.0124874	1.85964e-06	0.000529964	0.0107185	0.960566
Ruminococcus gauvreauii group	rs2047242	A	G	-0.067603	0.0133738	2.46371e-07	0.00712893	0.0111839	0.523846
Ruminococcus gauvreauii group	rs289410	A	G	0.0654926	0.0139101	2.27463e-06	0.00120534	0.0121112	0.920723
Ruminococcus gauvreauii group	rs71386687	T	G	0.121037	0.02386	2.90764e-07	-0.0263479	0.0197007	0.181091
Ruminococcus gauvreauii group	rs9870933	G	A	-0.0621643	0.0126072	8.49122e-07	-0.029214	0.0108591	0.00713937
Ruminococcus gnavus group	rs12136548	C	T	0.0901946	0.0196476	3.09628e-06	-0.00522026	0.0113138	0.644508
Ruminococcus gnavus group	rs13163520	G	A	-0.127377	0.0233883	5.61009e-08	0.0155552	0.0138515	0.261441
Ruminococcus gnavus group	rs2909242	A	C	0.0909965	0.018351	7.40952e-07	-0.0205245	0.0109936	0.0619099
Ruminococcus gnavus group	rs3124783	G	A	0.11599	0.0249099	2.6652e-06	0.00644074	0.0150688	0.669072
Ruminococcus gnavus group	rs62167033	T	C	0.185289	0.0396295	3.49526e-06	0.00423959	0.0208707	0.839029
Ruminococcus gnavus group	rs934940	A	C	-0.105045	0.0229588	2.73703e-06	-0.0285492	0.0140254	0.0417975
Ruminococcus gnavus group	rs9872758	T	C	0.0849233	0.0176643	1.66027e-06	-0.011424	0.0104882	0.276052
Ruminococcus torques group	rs10904297	A	G	-0.167804	0.0389812	2.68714e-06	0.0407917	0.0288126	0.156847
Ruminococcus torques group	rs12434631	A	G	0.074697	0.0153401	2.77249e-06	0.00588006	0.0149937	0.694935
Ruminococcus torques group	rs35866622	T	C	-0.0612024	0.0109421	2.21335e-08	0.00911869	0.0105209	0.386094
Ruminococcus torques group	rs4073731	T	C	0.0651948	0.0142221	4.05247e-06	-0.00234336	0.0146784	0.873159
Ruminococcus torques group	rs8080469	G	A	0.0490727	0.0107036	3.49526e-06	-0.00880958	0.0105095	0.401893
Ruminococcus1	rs11783695	G	T	-0.0734114	0.0161398	4.72683e-06	0.0161962	0.0153381	0.290994
Ruminococcus1	rs17781867	C	T	0.0999271	0.0211728	1.96336e-06	0.0422098	0.0182406	0.0206643
Ruminococcus1	rs6493760	T	C	-0.0535262	0.0115885	3.38361e-06	0.00674423	0.010791	0.531978
Ruminococcus1	rs7117576	A	G	0.0829505	0.0170891	6.47978e-07	-0.0199383	0.0161107	0.215871
Ruminococcus1	rs7583465	C	T	0.0527654	0.0112619	2.55611e-06	0.00168788	0.0107027	0.874689
Ruminococcus2	rs12986628	T	C	-0.0665937	0.0140168	2.142e-06	-0.0017771	0.0124997	0.886945
Ruminococcus2	rs2368224	T	G	0.199648	0.0438453	3.62928e-06	0.0197305	0.029997	0.510698
Ruminococcus2	rs2997412	G	A	0.0568439	0.0122325	4.22114e-06	-0.0112031	0.0111183	0.313632
Ruminococcus2	rs58681734	A	G	0.0723875	0.0160787	4.18177e-06	-0.0193971	0.0149704	0.19508
Ruminococcus2	rs75140805	T	G	0.0836825	0.0176445	3.95294e-06	0.000654014	0.0155586	0.96647
Ruminococcus2	rs7635831	G	A	0.0618344	0.0129031	1.98052e-06	0.0129651	0.0116284	0.26487
Ruminococcus2	rs78120384	A	G	-0.192815	0.0392045	3.31184e-07	-0.0316051	0.0247325	0.201293
Sellimonas	rs13417181	T	C	0.166509	0.0337521	7.61746e-07	-0.00464007	0.0137439	0.735658
Sellimonas	rs2016057	C	A	0.125878	0.0256153	1.02698e-06	0.0190734	0.0107843	0.0769556
Sellimonas	rs2187447	A	C	0.243457	0.0527695	3.97805e-06	-0.0106789	0.0205708	0.603669
Sellimonas	rs2371572	A	C	0.127349	0.0250862	4.46355e-07	-0.00681802	0.0105241	0.517082
Sellimonas	rs4600608	G	A	0.137152	0.0301702	4.94846e-06	-0.0153315	0.012572	0.222656
Sellimonas	rs56203279	T	C	-0.124045	0.0269115	3.71997e-06	-0.0119988	0.0112621	0.286687
Slackia	rs12440440	A	G	0.0901934	0.0190582	2.62869e-06	-0.00465558	0.0111391	0.675983
Slackia	rs16894137	C	T	-0.122792	0.0263047	2.71181e-06	-0.00496231	0.0153786	0.74694
Slackia	rs4492265	G	A	0.0905757	0.0191658	2.40924e-06	-0.00756683	0.0110735	0.494398
Slackia	rs8901	C	T	0.0934594	0.0186813	6.07002e-07	-0.0168669	0.0108011	0.118385
Streptococcus	rs10448310	A	G	-0.0517935	0.0111324	3.30704e-06	0.00872517	0.0105832	0.409693
Streptococcus	rs11110281	T	C	-0.137519	0.0227398	2.58315e-09	-0.0201707	0.0218122	0.355098
Streptococcus	rs11720390	G	A	0.107024	0.0228121	3.59484e-06	-0.0141473	0.0195359	0.468962
Streptococcus	rs11764382	A	G	-0.0695345	0.0143671	1.28632e-06	-0.0255771	0.0136119	0.0602421
Streptococcus	rs17708276	A	G	-0.0793955	0.0170628	3.04096e-06	-0.0199191	0.0152142	0.190453
Streptococcus	rs1918540	A	G	-0.059639	0.0128148	2.44068e-06	0.00525832	0.0120433	0.662387
Streptococcus	rs4968759	A	G	-0.0515109	0.0112068	3.7812e-06	-0.0140951	0.0106175	0.184331
Streptococcus	rs6806351	T	C	-0.0633829	0.0136647	4.93867e-06	0.00786209	0.0123952	0.525895
Streptococcus	rs72739637	A	G	0.0959942	0.0193213	1.03307e-06	-0.00910809	0.0166126	0.58351
Streptococcus	rs7916711	A	G	0.102891	0.0217362	2.717e-06	-0.0102803	0.0227552	0.651429
Streptococcus	rs9903102	C	A	-0.0709483	0.0155275	4.17994e-06	-0.00977807	0.0151885	0.519716
Subdoligranulum	rs10065321	T	C	-0.0512828	0.0108105	2.10155e-06	-0.0183412	0.0106798	0.0859112
Subdoligranulum	rs12590825	C	A	-0.0525287	0.0109942	2.07888e-06	0.00542183	0.0108291	0.616602
Subdoligranulum	rs2114677	C	T	-0.104176	0.0230829	2.71725e-06	-0.00979179	0.022927	0.669317
Subdoligranulum	rs2171249	C	T	0.106744	0.0233213	4.50557e-06	-0.00666491	0.0197201	0.735382
Subdoligranulum	rs3761728	G	T	0.0543458	0.0118866	3.8675e-06	0.00518692	0.011466	0.651
Subdoligranulum	rs4347804	G	A	-0.166063	0.0357483	2.18404e-06	-0.0059461	0.0256005	0.816332
Subdoligranulum	rs6555306	C	T	0.0740777	0.0155463	2.80666e-06	0.0170712	0.0160563	0.287688
Sutterella	rs13173038	A	G	-0.0718076	0.0151627	2.72986e-06	-0.00882237	0.0129407	0.495395
Sutterella	rs143438747	T	C	-0.145793	0.0306867	3.2802e-06	0.0230067	0.0217841	0.290912
Sutterella	rs2321387	G	A	-0.0592876	0.0124509	1.86518e-06	-0.0125103	0.0105618	0.236221
Sutterella	rs7499539	A	G	0.0617478	0.0130998	2.35771e-06	-0.0194534	0.011381	0.0873977
Turicibacter	rs11054680	T	C	-0.104751	0.0226997	2.30978e-06	-0.00358604	0.0160798	0.823524
Turicibacter	rs12603364	T	C	0.110861	0.0225598	8.66603e-07	-0.000503226	0.0162494	0.975294
Turicibacter	rs149744580	A	G	0.169883	0.0315478	7.00971e-08	0.0127273	0.0221835	0.566152
Turicibacter	rs2834977	T	C	-0.0959995	0.0208261	3.95585e-06	0.00865227	0.0146588	0.555027
Turicibacter	rs4869133	G	A	0.131186	0.027197	2.5537e-06	-0.00400632	0.0193263	0.835776
Turicibacter	rs55756211	T	C	-0.115115	0.0240708	2.8053e-06	-0.0201441	0.0172116	0.241849
Tyzzerella3	rs17706273	T	C	-0.140368	0.0274708	5.87814e-07	-0.0052159	0.0153086	0.733316
Tyzzerella3	rs4904512	T	C	-0.117151	0.0250306	3.09272e-06	0.0175046	0.0136029	0.198155
Tyzzerella3	rs55799124	A	G	-0.11435	0.0238604	1.33549e-06	-0.012921	0.0125119	0.301746
Tyzzerella3	rs67476743	T	G	0.132164	0.022208	3.7405e-09	0.00368291	0.0114954	0.748678
Tyzzerella3	rs6920448	C	T	-0.141081	0.0305446	4.15375e-06	-0.00403746	0.0161279	0.802324
Tyzzerella3	rs7019909	T	C	0.144156	0.0301626	1.76121e-06	0.00116003	0.0173195	0.946599
Tyzzerella3	rs7333521	T	C	-0.207191	0.0453121	4.87607e-06	0.026638	0.0229226	0.2452
Tyzzerella3	rs75091807	G	T	-0.184966	0.0383029	1.70675e-06	0.00970745	0.0186232	0.602189
Tyzzerella3	rs7561370	C	T	-0.131341	0.0286292	1.51604e-06	0.0247599	0.0155929	0.11231
Veillonella	rs1882878	A	G	-0.0768966	0.0163908	2.98092e-06	0.0074268	0.0119344	0.533745
Veillonella	rs2013594	C	T	0.0720698	0.0155153	3.42129e-06	0.0144674	0.0112297	0.197639
Veillonella	rs62376424	C	T	-0.0762216	0.0163499	3.65452e-06	0.00294991	0.0111012	0.790447
Veillonella	rs742016	A	G	-0.0688571	0.0149769	4.65693e-06	-0.0204009	0.0106518	0.05546
Victivallis	rs11899949	G	A	0.130568	0.0276239	2.76707e-06	0.00862614	0.012059	0.474406
Victivallis	rs12512543	A	C	-0.178036	0.0374344	2.54132e-06	0.0157008	0.0160511	0.327987
Victivallis	rs4764863	G	A	0.121561	0.0246058	8.22224e-07	-0.0139466	0.0104983	0.184026
Victivallis	rs4895919	C	T	0.116918	0.0247515	2.75201e-06	-0.00645004	0.0105274	0.540081
Victivallis	rs56349194	A	G	-0.158501	0.0315231	6.25749e-07	0.0163157	0.0139463	0.242043
