# Supplementary material for: Association of gut microbiota with age-related macular degeneration and glaucoma: a bidirectional Mendelian randomization study
Source: Preprints.org preprint supplement (doi:10.20944/preprints202310.0525.v1), 2023-10-09
Supplement: Supplementary file 2 [file S1 SNPs information of bacteria with AMD.xlsx]

## Sheet: Sheet1
Table S1. SNPs information of bacteria with AMD.
Bacterial taxa (Exposures)	SNP	Effect allele	Other allele	Exposure (Bacteria)			Outcome (AMD)
				Beta	SE	P	Beta	SE	P
Adlercreutzia	rs13231526	C	A	0.143237	0.0311654	4.81e-06	0.0424	0.0278	0.1274
Adlercreutzia	rs2717140	C	T	-0.119225	0.0251081	2.05e-06	0.038	0.0239	0.1121
Adlercreutzia	rs7680684	T	C	0.083381	0.0168901	9.77e-07	0.0223	0.0157	0.1561
Adlercreutzia	rs9490822	C	T	-0.0734512	0.0155789	2.54e-06	0.0096	0.0149	0.5205
Akkermansia	rs111862613	T	C	0.0911199	0.0196748	3.39234e-06	-0.0673	0.0307	0.0280498
Akkermansia	rs117107102	A	G	0.204406	0.0431629	3.01141e-06	0.0017	0.0401	0.9664
Akkermansia	rs11729256	T	C	0.0750473	0.0150184	6.58385e-07	-0.0043	0.0165	0.793299
Akkermansia	rs12908520	G	A	0.061772	0.0130954	2.2648e-06	0.0001	0.0145	0.9918
Akkermansia	rs2602429	T	C	-0.0745352	0.0156201	2.71569e-06	0.0223	0.0181	0.2172
Akkermansia	rs4242783	A	G	-0.0685454	0.0147701	2.99799e-06	0.0113	0.0181	0.5325
Akkermansia	rs4936098	G	A	-0.0649225	0.0135934	1.1036e-06	-0.0023	0.0144	0.8738
Akkermansia	rs74542928	T	C	0.112623	0.0236434	1.4802e-06	-0.0032	0.0241	0.8953
Akkermansia	rs9349825	A	G	-0.0703407	0.0147133	2.59884e-06	0.0156	0.016	0.3298
Alistipes	rs1107244	G	A	0.0758558	0.0171182	3.59062e-06	-0.0152	0.0251	0.543599
Alistipes	rs11769002	G	A	-0.0528793	0.0109389	1.44961e-06	-0.0236	0.0152	0.1218
Alistipes	rs67705352	T	G	-0.0532404	0.0110864	1.65124e-06	-0.0074	0.0151	0.6244
Alistipes	rs7129639	A	C	0.0524955	0.0109584	1.78423e-06	-0.0081	0.0143	0.569799
Alistipes	rs8130320	A	G	-0.049002	0.010717	4.83615e-06	-0.0156	0.0142	0.271
Allisonella	rs1901739	G	T	-0.115769	0.0248626	3.58798e-06	0.021	0.0139	0.1321
Allisonella	rs35778461	C	T	0.146679	0.0297186	1.20629e-06	0.0219	0.0179	0.2223
Allisonella	rs602075	G	A	-0.168974	0.0296976	3.56574e-08	-0.0288	0.016	0.0721705
Allisonella	rs6742198	A	G	-0.149152	0.0316484	3.34511e-06	0.0081	0.0186	0.6637
Anaerofilum	rs10794359	C	T	0.0953524	0.02006	2.23496e-06	0.0284	0.0161	0.0783195
Anaerofilum	rs17096874	C	T	-0.126337	0.0268919	2.86029e-06	0.0104	0.0191	0.5872
Anaerofilum	rs4506496	A	G	-0.10309	0.0212861	1.48659e-06	-0.0079	0.0149	0.5936
Anaerofilum	rs712981	A	C	0.10076	0.0202902	6.83109e-07	0.0203	0.0145	0.1635
Anaerofilum	rs79598899	C	T	0.182586	0.0357284	3.74731e-07	-0.0478	0.0282	0.0904003
Anaerofilum	rs816292	T	C	-0.113003	0.02204	2.6404e-07	0.0246	0.0157	0.1174
Anaerostipes	rs2014785	T	C	0.0515687	0.0112199	4.68058e-06	-0.0032	0.0148	0.8288
Anaerostipes	rs2396460	C	T	0.0512653	0.0109555	2.91092e-06	-0.0147	0.0154	0.3399
Anaerostipes	rs2804244	G	A	0.053089	0.0110983	2.04052e-06	0.0039	0.0143	0.787601
Anaerostipes	rs3900776	G	A	-0.110013	0.0236302	2.74764e-06	-0.0173	0.0316	0.5824
Anaerostipes	rs60983350	G	A	-0.0539901	0.0116575	4.42059e-06	-0.0095	0.0248	0.7011
Anaerostipes	rs62157625	T	C	0.088573	0.0185548	1.44907e-06	0.0196	0.0256	0.443
Anaerostipes	rs62215703	G	A	0.0644965	0.0136702	1.9777e-06	-0.0005	0.018	0.9785
Anaerostipes	rs6726833	C	A	-0.0877497	0.0189408	3.32216e-06	-0.0325	0.0268	0.225
Anaerostipes	rs6854026	C	T	0.0508482	0.0109075	3.1958e-06	0.0021	0.0143	0.8809
Anaerostipes	rs7193624	T	C	-0.0750642	0.0150723	5.35476e-07	-0.0093	0.0195	0.6357
Anaerotruncus	rs1272208	T	G	0.0611743	0.0129831	4.27986e-06	0.0074	0.0173	0.6689
Anaerotruncus	rs4669806	G	T	0.0576389	0.0122994	2.42058e-06	0.0039	0.0157	0.8038
Anaerotruncus	rs6563550	T	C	0.0877135	0.0176745	2.34515e-07	-0.0215	0.0247	0.385
Anaerotruncus	rs8005030	C	T	0.0554447	0.0117854	2.28297e-06	-0.0178	0.015	0.2334
Anaerotruncus	rs9347879	T	C	0.050618	0.011049	4.22328e-06	-0.0008	0.0138	0.9561
Bacteroides	rs11585893	A	G	-0.0740746	0.0147633	1.79511e-06	0.018	0.0225	0.4241
Bacteroides	rs17619981	T	G	0.0880978	0.0187002	2.68683e-06	-0.0337	0.0259	0.1928
Bacteroides	rs66474973	G	T	0.0812515	0.0164479	6.80973e-07	0.0141	0.0229	0.537901
Bacteroides	rs6795673	C	T	0.0538565	0.0105251	3.37909e-07	-0.0128	0.0142	0.3685
Bacteroides	rs9507307	C	T	0.0604456	0.0129128	2.12711e-06	0.0248	0.0187	0.184
Barnesiella	rs12909713	C	T	-0.0550716	0.0120039	4.94527e-06	-0.0048	0.0142	0.7358
Barnesiella	rs13242616	C	T	0.0583747	0.0123176	2.29018e-06	-0.0099	0.0165	0.55
Barnesiella	rs199035	G	A	0.0559495	0.0119716	3.00296e-06	0.0221	0.0146	0.1295
Barnesiella	rs2276875	A	G	-0.0697176	0.0139537	4.65029e-07	0.0328	0.0188	0.0804192
Barnesiella	rs2428166	G	A	-0.165859	0.0337309	8.50883e-07	-0.0074	0.0342	0.8299
Barnesiella	rs35177866	A	G	0.0917125	0.0190133	2.94761e-06	0.0012	0.0318	0.9708
Barnesiella	rs60316894	C	T	-0.121478	0.025184	1.19064e-06	0.0033	0.035	0.9238
Barnesiella	rs62251337	G	A	0.0690763	0.0149374	4.2416e-06	0.0046	0.018	0.7971
Barnesiella	rs77455852	T	G	-0.0891491	0.0195601	3.16352e-06	0.0454	0.0268	0.0897801
Barnesiella	rs79795328	A	G	-0.0818645	0.0176441	4.23302e-06	0.0005	0.0208	0.9827
Bifidobacterium	rs182549	T	C	-0.119703	0.0127294	1.2782e-20	-0.024	0.0178	0.1777
Bifidobacterium	rs62181700	G	A	-0.0624643	0.0131205	2.17245e-06	-0.006	0.016	0.7099
Bifidobacterium	rs7322849	T	C	0.112428	0.0201813	1.08368e-08	0.0187	0.045	0.6771
Bifidobacterium	rs73797465	T	G	-0.0953566	0.0209236	4.38157e-06	0.0158	0.031	0.6107
Bifidobacterium	rs75344046	C	T	0.232354	0.0505979	4.86351e-06	0.0112	0.0392	0.774599
Bifidobacterium	rs857444	C	T	0.0558234	0.0121219	3.571e-06	-0.0012	0.0149	0.9364
Bilophila	rs1241171	G	A	-0.0692654	0.0150148	4.24033e-06	-0.0049	0.017	0.7715
Bilophila	rs1571225	T	C	-0.0826826	0.0170621	1.1229e-06	0.0038	0.0205	0.854
Bilophila	rs3827020	C	T	0.0766479	0.0160642	1.78875e-06	0.0097	0.0229	0.6715
Bilophila	rs542415	T	C	-0.0613623	0.0133436	4.70945e-06	-0.0131	0.0152	0.3886
Bilophila	rs6793291	A	C	-0.112729	0.0241633	3.11322e-06	0.0088	0.0273	0.746401
Bilophila	rs7802841	A	C	-0.0670097	0.0137701	1.76954e-06	-0.0181	0.0157	0.2494
Butyricimonas	rs113054641	G	A	-0.144881	0.0274574	1.73696e-07	0.0498	0.028	0.0749601
Butyricimonas	rs1862649	G	A	0.113124	0.0248176	4.76255e-06	-0.0805	0.0253	0.001439
Butyricimonas	rs62130338	A	G	0.0732608	0.0158324	3.89807e-06	0.011	0.0177	0.5329
Butyricimonas	rs62390301	T	C	-0.0872983	0.0174893	7.41908e-07	-0.0111	0.0186	0.5482
Butyricimonas	rs7083431	A	C	0.0703539	0.0144439	8.85462e-07	-0.0002	0.0148	0.9874
Butyricimonas	rs71428626	G	T	-0.133188	0.0289905	4.80408e-06	-0.0014	0.0286	0.9619
Butyricimonas	rs78453362	A	G	-0.14948	0.0327073	4.05807e-06	-0.0543	0.0327	0.0971896
Butyricimonas	rs9657374	C	T	0.0680719	0.0148172	4.5036e-06	0.0189	0.0157	0.2297
Butyrivibrio	rs11761679	T	C	0.154775	0.0321539	2.20232e-06	0.0202	0.0187	0.2809
Butyrivibrio	rs16941336	C	T	0.127488	0.0267936	1.53183e-06	0.02	0.0165	0.2276
Butyrivibrio	rs4537857	T	C	-0.12459	0.0260992	1.80194e-06	-0.0057	0.0155	0.713099
Butyrivibrio	rs72723662	C	T	0.224078	0.0449336	7.86249e-07	0.0601	0.0307	0.0501499
Butyrivibrio	rs74622183	A	G	-0.201027	0.0428204	2.45748e-06	0.0528	0.0274	0.0540804
Butyrivibrio	rs7752361	G	A	0.11923	0.0239975	7.69113e-07	0.0185	0.014	0.1875
Butyrivibrio	rs7763512	A	G	-0.119846	0.0253367	3.10656e-06	0.0144	0.0149	0.3326
Candidatus Soleaferrea	rs10090365	G	A	0.0834413	0.0180989	4.17311e-06	-0.018	0.014	0.1987
Candidatus Soleaferrea	rs10108780	A	G	-0.092834	0.0199807	3.64083e-06	0.0036	0.0165	0.8266
Candidatus Soleaferrea	rs4294381	C	T	-0.112197	0.023186	1.36848e-06	0.0281	0.0182	0.1219
Candidatus Soleaferrea	rs830151	A	G	-0.194561	0.0347932	4.25608e-08	-0.0299	0.0432	0.4889
Catenibacterium	rs12404911	C	T	0.140717	0.0304142	2.79892e-06	0.0015	0.0182	0.9343
Catenibacterium	rs212393	A	G	0.135254	0.0286209	3.62485e-06	0.0002	0.0153	0.9885
Catenibacterium	rs73128290	A	G	0.129726	0.0284563	4.29368e-06	-0.0116	0.0163	0.4774
Catenibacterium	rs77285108	G	A	-0.161826	0.0353447	3.62677e-06	0.0062	0.0205	0.763001
Christensenellaceae R 7group	rs17081797	A	G	-0.0904325	0.0204253	3.34033e-06	0.0687	0.0287	0.0167799
Christensenellaceae R 7group	rs62467127	C	T	0.114108	0.0251983	3.25364e-06	-0.0249	0.031	0.4217
Christensenellaceae R 7group	rs892686	A	G	0.0514099	0.011136	3.96862e-06	-0.0042	0.0145	0.7693
Clostridium sensustricto1	rs115807074	A	G	-0.22736	0.0492575	4.31688e-06	0.0237	0.0343	0.4885
Clostridium sensustricto1	rs116847295	C	T	0.110021	0.0246032	4.58121e-06	0.0388	0.03	0.1956
Clostridium sensustricto1	rs12341505	G	A	0.0810718	0.0180121	4.8217e-06	-0.0045	0.0233	0.8482
Clostridium sensustricto1	rs2795528	G	A	-0.184315	0.0392204	2.72038e-06	0.0322	0.0334	0.3345
Clostridium sensustricto1	rs2817172	C	T	0.058139	0.0124492	2.76656e-06	0.037	0.0162	0.0228202
Clostridium sensustricto1	rs550843	T	C	-0.0783246	0.0169209	2.05069e-06	0.0149	0.0217	0.4935
Collinsella	rs2103510	G	A	0.0786551	0.0168217	2.42477e-06	-0.0063	0.0216	0.768799
Collinsella	rs73052258	G	A	0.0930178	0.0202658	1.71581e-06	0.0183	0.0257	0.4776
Collinsella	rs9541268	C	A	0.09597	0.0197312	8.79427e-07	-0.0192	0.0227	0.3977
Coprobacter	rs143662916	C	T	0.253264	0.0540141	3.07249e-06	-0.0437	0.0326	0.1812
Coprobacter	rs213863	T	C	0.0887412	0.0188377	2.34882e-06	-0.0153	0.0158	0.3311
Coprobacter	rs305411	A	G	0.129218	0.0264518	1.00907e-06	-0.0015	0.0223	0.9446
Coprobacter	rs3828477	G	T	-0.0912179	0.019569	2.88975e-06	-0.0034	0.0167	0.8378
Coprobacter	rs72821405	T	C	-0.147365	0.0319978	4.75762e-06	-0.0277	0.0278	0.3191
Coprococcus1	rs1010560	C	A	0.0580232	0.0122722	1.95916e-06	0.0136	0.0165	0.4072
Coprococcus1	rs12794898	G	T	0.0903299	0.0197212	4.9153e-06	0.0224	0.0284	0.4297
Coprococcus1	rs1576241	A	G	-0.0510343	0.0109535	3.32859e-06	0.0067	0.0145	0.6407
Coprococcus1	rs4277593	G	A	-0.0585649	0.0109914	1.1397e-07	0.0006	0.014	0.9674
Coprococcus1	rs56405618	A	G	-0.08963	0.0186508	1.57195e-06	-0.0207	0.0254	0.4154
Coprococcus1	rs73031725	T	C	0.167591	0.0355224	1.97916e-06	-0.0714	0.037	0.0535303
Coprococcus1	rs74101919	T	C	-0.0718988	0.0144651	1.0329e-06	0.0024	0.0185	0.8964
Coprococcus2	rs2482516	C	T	0.0754415	0.0164619	4.72335e-06	0.0219	0.0177	0.2162
Coprococcus2	rs6677933	C	T	-0.0804405	0.0164216	1.185e-06	-0.007	0.0179	0.697199
Coprococcus2	rs72680320	T	C	-0.0649382	0.013919	2.27117e-06	0.0072	0.0146	0.623199
Coprococcus3	rs11080344	C	T	0.0516921	0.0113054	4.78696e-06	0.0045	0.014	0.745101
Coprococcus3	rs13394391	C	T	-0.0709302	0.0150918	2.20318e-06	-0.0161	0.0191	0.3994
Coprococcus3	rs178271	C	T	-0.145257	0.0294239	7.81088e-07	0.0031	0.0362	0.9312
Coprococcus3	rs7521171	A	G	0.0596434	0.0129279	4.32245e-06	0.0006	0.0165	0.9716
Coprococcus3	rs8100692	T	C	0.0577411	0.0113476	4.16457e-07	-0.0178	0.0145	0.2209
Defluviitaleaceae UCG011	rs112893842	T	C	0.11381	0.0232806	1.44534e-06	0.0135	0.0228	0.5539
Defluviitaleaceae UCG011	rs1582238	C	T	-0.0805036	0.0167257	1.56776e-06	0.0184	0.0148	0.2127
Defluviitaleaceae UCG011	rs4344384	T	G	-0.0715978	0.0156309	4.83237e-06	-0.0129	0.0145	0.3745
Defluviitaleaceae UCG011	rs4677103	A	G	0.0977912	0.0197263	9.59555e-07	-0.0311	0.0267	0.244
Defluviitaleaceae UCG011	rs55658617	T	C	0.174369	0.0362226	2.15293e-06	-0.0265	0.0349	0.4471
Defluviitaleaceae UCG011	rs72731813	C	T	-0.147383	0.0293796	4.33112e-07	-0.0262	0.0287	0.3617
Defluviitaleaceae UCG011	rs9608282	T	G	0.142939	0.0299793	2.52046e-06	0.027	0.0312	0.3879
Defluviitaleaceae UCG011	rs9725395	A	G	-0.13834	0.029554	3.51925e-06	-0.0196	0.0274	0.4752
Desulfovibrio	rs13066142	G	A	0.119141	0.0250891	3.78669e-06	0.0023	0.026	0.9279
Desulfovibrio	rs16863365	A	G	0.109402	0.0226964	1.79449e-06	0.0064	0.0215	0.7659
Desulfovibrio	rs2456226	A	C	0.0854927	0.0172749	8.5487e-07	-0.0132	0.0263	0.614301
Desulfovibrio	rs2853179	T	C	-0.0811971	0.0174234	2.42438e-06	0.0165	0.0176	0.3479
Desulfovibrio	rs6580353	T	C	0.0770979	0.0169735	4.93856e-06	0.0016	0.0183	0.9308
Dorea	rs13279148	G	A	0.0715309	0.0150878	2.25284e-06	0.0267	0.0199	0.1799
Dorea	rs1899291	T	C	-0.0697217	0.0150285	4.56688e-06	0.0099	0.0213	0.6418
Dorea	rs4793307	C	T	0.0574165	0.0122472	4.00691e-06	0.0366	0.0169	0.03039
Dorea	rs62503162	A	G	-0.0974091	0.0194379	7.46603e-07	-0.0387	0.0255	0.1284
Dorea	rs73729431	C	T	-0.13745	0.0299983	3.16738e-06	-0.0702	0.0327	0.0316199
Eggerthella	rs112205261	T	C	-0.188618	0.0403613	3.34649e-06	-0.0123	0.0305	0.6875
Eggerthella	rs2223081	A	G	-0.102572	0.0221108	3.88893e-06	0.0053	0.0163	0.7452
Eggerthella	rs2240838	G	A	-0.0980582	0.0197653	7.36207e-07	0.0026	0.0156	0.8685
Eggerthella	rs3851328	G	T	0.107774	0.0236527	4.1759e-06	-0.0029	0.0171	0.8636
Eggerthella	rs76663501	C	T	0.175349	0.0378576	4.8257e-06	0.0293	0.0305	0.3374
Eisenbergiella	rs11027642	C	T	0.129006	0.0284844	4.9187e-06	-0.0451	0.0213	0.0343598
Eisenbergiella	rs1508033	A	C	0.091546	0.0195787	3.22887e-06	-0.0042	0.0146	0.7709
Eisenbergiella	rs2683098	T	C	-0.107319	0.022515	2.23748e-06	-0.0268	0.0174	0.1232
Eisenbergiella	rs3812426	A	G	-0.106447	0.0224159	2.71688e-06	-0.0034	0.0174	0.8453
Eisenbergiella	rs4462860	G	A	0.0939071	0.0201104	4.16217e-06	-0.006	0.0162	0.7103
Enterorhabdus	rs114731706	T	G	0.182308	0.0382298	2.1734e-06	0.0065	0.0325	0.8416
Enterorhabdus	rs3017103	G	A	-0.0980897	0.0208995	2.94042e-06	-0.0183	0.0183	0.3186
Enterorhabdus	rs73331712	T	C	0.26199	0.055123	4.8492e-06	0.0147	0.0339	0.663901
Erysipelatoclostridium	rs17804233	C	T	0.0662914	0.0144203	4.58606e-06	0.0212	0.0139	0.1282
Erysipelatoclostridium	rs340991	A	G	-0.0740482	0.0158891	3.74938e-06	-0.0087	0.0161	0.5881
Erysipelatoclostridium	rs4697572	A	G	-0.0810636	0.0163308	7.59347e-07	0.014	0.0168	0.4035
Erysipelatoclostridium	rs58236560	G	T	-0.111157	0.0234426	2.16118e-06	0.0782	0.0257	0.002374
Erysipelatoclostridium	rs622418	A	G	-0.0668051	0.0143224	3.68154e-06	0.0217	0.0144	0.1336
Erysipelatoclostridium	rs6474512	C	A	-0.067015	0.0143201	3.01544e-06	-0.0132	0.0145	0.3634
Erysipelatoclostridium	rs710230	C	T	-0.143381	0.0281514	6.33126e-07	0.0362	0.0293	0.218
Erysipelatoclostridium	rs7221249	G	A	-0.0839861	0.0142741	4.30953e-09	0.0108	0.0146	0.46
Escherichia Shigella	rs113127095	A	G	0.151009	0.0323434	3.3335e-06	-0.0086	0.0336	0.7986
Escherichia Shigella	rs1154904	G	A	0.0613376	0.0130644	3.03753e-06	-0.0031	0.0139	0.823
Escherichia Shigella	rs592299	T	C	-0.0592004	0.0129486	4.76925e-06	0.0226	0.0146	0.1228
Escherichia Shigella	rs73208162	A	G	-0.119296	0.024839	2.19392e-06	-0.0141	0.0335	0.6745
Eubacterium brachy group	rs112617308	T	C	-0.170873	0.0362844	2.38035e-06	0.0004	0.0239	0.9878
Eubacterium brachy group	rs2913110	T	C	-0.105143	0.022942	4.55806e-06	-0.0051	0.0148	0.73
Eubacterium brachy group	rs4862235	A	G	-0.104806	0.0225751	3.73147e-06	-0.0121	0.0143	0.3961
Eubacterium brachy group	rs62348779	T	C	-0.201481	0.043286	3.7812e-06	0.0343	0.031	0.2681
Eubacterium coprostanoligenes group	rs12906958	C	T	-0.0533159	0.0115935	4.348e-06	0.0121	0.0151	0.4211
Eubacterium coprostanoligenes group	rs17159861	C	T	0.0962228	0.0168388	1.03786e-08	0.0116	0.0249	0.6406
Eubacterium coprostanoligenes group	rs4076415	G	T	-0.0515152	0.0110294	1.98976e-06	0.0059	0.0166	0.7247
Eubacterium coprostanoligenes group	rs6762473	A	C	-0.0521584	0.0112353	4.26108e-06	0.0235	0.0148	0.1119
Eubacterium coprostanoligenes group	rs76898927	G	A	0.123055	0.0266375	4.78983e-06	0.0243	0.0339	0.473301
Eubacterium coprostanoligenes group	rs9648214	T	C	-0.0828719	0.016431	2.52029e-07	0.0144	0.0209	0.490601
Eubacterium eligens group	rs265534	T	G	-0.0563756	0.0120127	2.26757e-06	-0.0105	0.0148	0.4772
Eubacterium eligens group	rs4583233	A	C	0.0670205	0.0128122	2.83851e-07	-0.0105	0.0163	0.5193
Eubacterium eligens group	rs6923695	T	G	0.103268	0.0229525	4.87405e-06	0.0055	0.0268	0.8362
Eubacterium fissicatena group	rs11876297	T	C	0.131469	0.0281712	2.66557e-06	0.0112	0.0196	0.5658
Eubacterium fissicatena group	rs151257695	A	G	0.20951	0.0454847	3.09678e-06	-0.0275	0.0299	0.357
Eubacterium fissicatena group	rs2733072	G	A	0.109644	0.0228306	1.49091e-06	-0.0153	0.0152	0.313
Eubacterium fissicatena group	rs3771393	T	C	-0.130842	0.0266671	7.37904e-07	0.0193	0.016	0.2298
Eubacterium fissicatena group	rs7104872	G	A	0.138612	0.0291906	2.73149e-06	-0.0058	0.0186	0.7568
Eubacterium hallii group	rs10798999	C	T	0.0601661	0.0126752	2.60555e-06	0.0059	0.0172	0.733701
Eubacterium hallii group	rs10808115	C	A	0.0504747	0.0109922	4.42446e-06	0.0174	0.0143	0.224
Eubacterium hallii group	rs13116360	T	C	0.154124	0.0297185	2.9449e-07	0.0148	0.0333	0.6562
Eubacterium hallii group	rs28584818	A	G	0.126115	0.0268627	4.43231e-06	-0.0311	0.0314	0.3221
Eubacterium hallii group	rs60254196	G	A	0.0522832	0.0111865	2.69675e-06	0.0129	0.0151	0.3922
Eubacterium hallii group	rs6550770	C	T	0.198087	0.0443545	4.82303e-06	0.0297	0.047	0.5278
Eubacterium hallii group	rs74018587	C	T	0.208943	0.043822	3.70254e-06	-0.0227	0.043	0.597601
Eubacterium hallii group	rs949971	T	G	-0.0540164	0.0116101	3.29003e-06	-0.0185	0.0146	0.206
Eubacterium nodatum group	rs34297067	A	G	-0.186907	0.0341475	6.59781e-08	0.0396	0.0196	0.0429596
Eubacterium nodatum group	rs61841040	G	T	0.160621	0.0341609	3.56139e-06	-0.0128	0.0207	0.5358
Eubacterium nodatum group	rs77910827	C	T	0.201788	0.0413568	9.05378e-07	0.0092	0.0248	0.709601
Eubacterium oxidoreducens group	rs12423772	G	T	0.14098	0.0295029	2.62924e-06	-0.0125	0.0338	0.7114
Eubacterium oxidoreducens group	rs2973294	G	T	0.0923559	0.0195439	2.38836e-06	-0.0214	0.0143	0.1337
Eubacterium oxidoreducens group	rs34561138	G	A	0.216145	0.045992	2.51166e-06	-0.0131	0.0317	0.680201
Eubacterium oxidoreducens group	rs440215	T	C	-0.0932766	0.0195294	1.65406e-06	0.038	0.0212	0.0727294
Eubacterium rectale group	rs10248854	C	A	-0.0527827	0.0113464	4.20678e-06	0.0239	0.0148	0.1058
Eubacterium rectale group	rs10797540	A	G	0.0503179	0.0108389	3.53387e-06	-0.0312	0.0144	0.0307603
Eubacterium rectale group	rs314726	T	C	0.0528824	0.0109486	1.37965e-06	0.0083	0.0149	0.5777
Eubacterium rectale group	rs35398954	A	G	-0.0901402	0.0174602	5.39946e-07	0.0134	0.0248	0.5876
Eubacterium ruminantium group	rs10131724	C	A	0.199832	0.0414577	2.38666e-06	0.0193	0.0355	0.5875
Eubacterium ruminantium group	rs139749	C	T	-0.0845439	0.0171791	8.58836e-07	-0.0071	0.0159	0.6557
Eubacterium ruminantium group	rs16891896	G	A	-0.174787	0.0390573	2.38122e-06	0.0018	0.0347	0.9592
Eubacterium ruminantium group	rs17519472	C	T	0.107804	0.0233984	4.7036e-06	0.0215	0.0213	0.3126
Eubacterium ruminantium group	rs2116427	A	G	0.0911461	0.0182353	4.67369e-07	-0.0131	0.0163	0.4239
Eubacterium ruminantium group	rs2229917	A	G	0.153538	0.0323922	2.15894e-06	-0.0047	0.0296	0.8746
Eubacterium ruminantium group	rs57340348	T	C	-0.0979429	0.0212166	4.93276e-06	0.0106	0.019	0.576301
Eubacterium ruminantium group	rs606117	G	A	-0.0833243	0.018056	4.81637e-06	-0.0042	0.0157	0.7905
Eubacterium ruminantium group	rs7000472	G	A	0.0762282	0.016523	4.06846e-06	-0.0072	0.0143	0.6158
Eubacterium ruminantium group	rs72836424	C	T	-0.139825	0.030069	2.62126e-06	0.0352	0.0266	0.1859
Eubacterium ventriosum group	rs11617697	A	G	-0.143349	0.0286241	7.21755e-07	-0.0256	0.0356	0.4729
Eubacterium ventriosum group	rs12964517	G	A	0.0587198	0.0123453	2.07501e-06	0.0383	0.0152	0.0117999
Eubacterium ventriosum group	rs16884680	G	T	-0.0906428	0.0191909	1.73968e-06	0.006	0.0265	0.8222
Eubacterium ventriosum group	rs3809430	T	C	-0.0548171	0.0118426	3.5532e-06	-0.0151	0.0146	0.3013
Eubacterium ventriosum group	rs57199565	T	C	0.0783394	0.0160257	7.9704e-07	-0.0021	0.0306	0.9455
Eubacterium ventriosum group	rs73615400	T	C	-0.0956303	0.0193428	9.53608e-07	-0.0057	0.0254	0.8229
Eubacterium ventriosum group	rs78250280	G	A	0.0749762	0.0164404	3.35792e-06	0.017	0.0234	0.4664
Eubacterium ventriosum group	rs876734	T	C	0.0618696	0.0132532	2.88908e-06	0.0105	0.0181	0.5628
Eubacterium xylanophilum	rs10140184	A	C	0.0576795	0.012599	4.95861e-06	0.0078	0.0177	0.6614
Eubacterium xylanophilum	rs10917203	A	C	0.0612633	0.0130917	3.15152e-06	0.02	0.0161	0.2144
Eubacterium xylanophilum	rs112176119	C	T	-0.113455	0.0245762	3.32767e-06	0.0732	0.0349	0.0357503
Eubacterium xylanophilum	rs13239072	G	A	0.0687427	0.0142728	1.81782e-06	-0.0034	0.0168	0.8416
Eubacterium xylanophilum	rs17830032	G	A	-0.160597	0.0310515	2.38891e-07	-0.0371	0.036	0.3026
Eubacterium xylanophilum	rs1999224	G	T	-0.0949051	0.0203503	3.75491e-06	-0.0182	0.0245	0.4563
Eubacterium xylanophilum	rs2213117	T	G	0.0877797	0.0189012	4.21328e-06	0.0127	0.023	0.5813
Faecalibacterium	rs1271565	C	T	-0.0576251	0.0119649	1.3017e-06	-0.0061	0.0182	0.7387
Faecalibacterium	rs6910935	G	A	-0.134864	0.0277032	1.37848e-06	0.0055	0.0336	0.8688
Faecalibacterium	rs75499067	C	T	0.227585	0.0465522	1.76449e-06	-0.016	0.0356	0.652701
Family XIII AD3011 group	rs12812672	T	C	-0.096065	0.020828	2.55806e-06	0.0098	0.0246	0.6904
Family XIII AD3011 group	rs16840310	G	A	0.0608052	0.0122149	6.75118e-07	-0.0148	0.0145	0.3059
Family XIII AD3011 group	rs16940167	C	T	0.0732552	0.0159898	3.90841e-06	-0.0396	0.0193	0.04062
Family XIII AD3011 group	rs17156849	G	A	-0.112891	0.0245292	4.1917e-06	-0.0286	0.0295	0.3309
Family XIII AD3011 group	rs62029761	A	G	0.128753	0.0276002	3.89081e-06	0.0185	0.0454	0.683
Family XIII AD3011 group	rs62200412	C	T	-0.0800851	0.0163834	5.80216e-07	-0.0044	0.0217	0.8381
Family XIII AD3011 group	rs72730932	C	A	-0.0899559	0.0177107	6.88763e-07	-0.0066	0.0215	0.757399
Family XIII UCG001	rs12049454	T	C	-0.0647298	0.0134065	1.17379e-06	-0.0146	0.0157	0.3517
Family XIII UCG001	rs1426266	C	T	0.0665521	0.0137151	1.24934e-06	0.0055	0.0158	0.7272
Family XIII UCG001	rs62414802	C	T	-0.0611904	0.013457	4.29181e-06	0.0005	0.0154	0.9746
Family XIII UCG001	rs7119679	G	A	-0.0809085	0.0174782	3.52493e-06	0.0083	0.0222	0.707301
Family XIII UCG001	rs76463770	A	G	0.19313	0.0419866	3.77477e-06	0.0001	0.0343	0.9988
Flavonifractor	rs11811696	T	C	-0.116063	0.0241012	2.07348e-06	-0.0273	0.0255	0.284
Flavonifractor	rs12030302	G	A	0.0692276	0.0137467	5.60841e-07	-0.0237	0.0141	0.0936397
Flavonifractor	rs34066017	A	G	0.0764294	0.0159789	1.52086e-06	-0.0247	0.0163	0.1289
Flavonifractor	rs806808	C	T	-0.0667272	0.0136557	1.17972e-06	-0.0017	0.0143	0.9079
Fusicatenibacter	rs1864685	A	C	-0.0494799	0.0108105	4.96158e-06	-0.0073	0.0138	0.5972
Fusicatenibacter	rs2025938	G	A	-0.0967298	0.0205426	2.98834e-06	0.0029	0.0277	0.9154
Fusicatenibacter	rs2132128	G	A	-0.0771914	0.0160344	1.07686e-06	-0.0019	0.022	0.9297
Fusicatenibacter	rs3303	T	C	-0.0953657	0.020407	3.93895e-06	-0.0058	0.029	0.8414
Fusicatenibacter	rs4378146	A	C	-0.0616691	0.0125259	7.20444e-07	0.0021	0.0164	0.8981
Fusicatenibacter	rs62187631	T	C	-0.0710571	0.015924	4.54527e-06	-0.0187	0.0222	0.3984
Fusicatenibacter	rs62353480	A	G	-0.0701397	0.0145589	1.56769e-06	-0.0272	0.0213	0.2021
Fusicatenibacter	rs704418	C	T	-0.0739124	0.0151073	7.77428e-07	-0.0025	0.0237	0.9157
Fusicatenibacter	rs8063430	T	C	-0.104026	0.022217	4.9289e-06	-0.0596	0.0329	0.0698699
Gordonibacter	rs322296	G	A	0.17869	0.037722	4.0242e-06	0.024	0.0233	0.3017
Gordonibacter	rs72714787	C	A	0.181405	0.0377102	1.42889e-06	0.0005	0.0244	0.9843
Gordonibacter	rs7294633	T	C	-0.12867	0.0249946	3.43764e-07	-0.0151	0.0157	0.3379
Haemophilus	rs10781340	A	G	-0.0948915	0.0203221	4.32265e-06	0.003	0.0207	0.8856
Haemophilus	rs111582866	G	A	-0.124265	0.026016	1.27347e-06	0.0209	0.0259	0.4201
Haemophilus	rs35509	G	A	0.128249	0.0268779	2.00951e-06	0.0002	0.0258	0.9931
Haemophilus	rs4822728	T	C	0.0705861	0.0151388	3.47848e-06	-0.0083	0.0149	0.579101
Haemophilus	rs76022354	C	T	0.244638	0.0505504	1.83033e-06	0.0213	0.0348	0.5406
Haemophilus	rs78909003	T	C	-0.246256	0.0503924	1.66744e-06	-0.0097	0.0348	0.7813
Haemophilus	rs9328464	T	C	0.0723095	0.0148799	1.42269e-06	0.0093	0.0141	0.508
Haemophilus	rs9382510	C	T	-0.093521	0.0172649	7.12049e-08	-0.0239	0.0173	0.1664
Haemophilus	rs9895850	T	C	-0.192957	0.0416755	2.14062e-06	0.0255	0.0342	0.4564
Holdemanella	rs12513188	G	A	0.0903906	0.0195276	4.65479e-06	0.0226	0.0174	0.1946
Holdemanella	rs4541991	T	C	-0.0927334	0.0194435	2.10092e-06	0.0159	0.0172	0.3552
Holdemanella	rs607782	C	T	0.0854214	0.0172515	7.19449e-07	-0.0155	0.0163	0.3436
Holdemanella	rs73011279	T	C	-0.0961669	0.0199336	1.36044e-06	0.0017	0.0186	0.9264
Holdemanella	rs75764681	T	C	-0.283103	0.0598999	1.94272e-06	0.1015	0.0527	0.0539995
Holdemanella	rs8113760	G	A	0.078999	0.01734	4.62392e-06	0.0069	0.016	0.6655
Holdemania	rs111745969	A	G	0.120677	0.0265781	3.70775e-06	0.0298	0.0257	0.2465
Holdemania	rs116500994	G	T	-0.13755	0.0293386	2.34477e-06	-0.057	0.0292	0.0507598
Holdemania	rs1867876	T	C	0.0842919	0.0162192	2.7388e-07	-0.0032	0.0156	0.8396
Holdemania	rs6133067	T	C	0.0910829	0.0178561	5.16928e-07	-0.0194	0.0215	0.3687
Holdemania	rs77293403	A	G	0.164556	0.0341775	1.77468e-06	-0.004	0.0332	0.9032
Holdemania	rs9500080	C	T	0.0926764	0.0178886	4.08517e-07	-0.0006	0.0179	0.9731
Howardella	rs12452946	A	G	-0.105833	0.0228941	3.80391e-06	-0.0196	0.0146	0.1769
Howardella	rs1484873	G	A	0.227831	0.046335	2.55918e-06	-0.0332	0.031	0.2831
Howardella	rs17167098	G	A	-0.169366	0.0352068	1.12323e-06	0.0022	0.0217	0.9198
Howardella	rs36081916	T	C	-0.18123	0.0402987	4.70046e-06	0.0019	0.0251	0.94
Howardella	rs609430	T	G	-0.112045	0.0239328	3.34488e-06	0.0126	0.0148	0.3944
Howardella	rs672217	G	A	0.164146	0.0349993	3.52468e-06	-0.0018	0.0214	0.9336
Howardella	rs901099	T	G	-0.12718	0.0250924	6.5286e-07	0.0025	0.0161	0.8769
Intestinibacter	rs10805326	A	G	-0.0775151	0.0139665	3.54544e-08	0.0063	0.0155	0.683
Intestinibacter	rs118030283	G	A	-0.151829	0.0324471	2.67436e-06	0.009	0.0341	0.7926
Intestinibacter	rs16938435	T	C	-0.112189	0.0235439	1.80098e-06	-0.0244	0.0269	0.3642
Intestinibacter	rs2702387	G	A	-0.0608559	0.0132145	4.25991e-06	0.0033	0.0151	0.829
Intestinibacter	rs4327025	G	A	-0.0810346	0.0154397	1.64327e-07	-0.0336	0.0172	0.0507201
Intestinibacter	rs478972	C	T	0.142681	0.0297116	1.81991e-06	0.0001	0.0317	0.9974
Intestinibacter	rs6875660	C	T	0.0890455	0.0193905	3.05781e-06	-0.0056	0.023	0.8072
Intestinimonas	rs10262702	T	C	0.0918017	0.0194885	2.06072e-06	0.0291	0.0239	0.2233
Intestinimonas	rs11258178	A	G	0.0660742	0.0134139	6.982e-07	0.0082	0.015	0.584201
Intestinimonas	rs12226153	A	G	-0.151142	0.0306922	5.12165e-07	0.0181	0.0314	0.5644
Intestinimonas	rs1859797	G	A	0.060368	0.0131793	4.1223e-06	-0.0058	0.0145	0.6897
Intestinimonas	rs2731794	C	T	0.120632	0.0257529	1.91743e-06	-0.0142	0.0327	0.6635
Intestinimonas	rs2930225	T	G	-0.0729524	0.0152948	1.34623e-06	0.0061	0.0188	0.7449
Intestinimonas	rs4784055	T	C	-0.175324	0.038599	8.71806e-07	0.0183	0.0345	0.595799
Intestinimonas	rs62240188	G	A	0.130074	0.0267179	2.20308e-06	-0.0334	0.031	0.2821
Intestinimonas	rs716604	A	G	0.0818068	0.0165992	8.56624e-07	-0.0079	0.0181	0.660601
Intestinimonas	rs7170984	T	C	-0.0658116	0.0140767	2.98353e-06	0.0094	0.0185	0.6112
Intestinimonas	rs72982915	C	T	0.183158	0.0402743	4.91157e-06	-0.0109	0.0347	0.752801
Lachnoclostridium	rs4738679	A	G	0.0520267	0.011404	4.41754e-06	-0.013	0.0148	0.3791
Lachnoclostridium	rs6112314	A	C	-0.0561715	0.0108174	2.43215e-07	-0.0166	0.0145	0.2542
Lachnoclostridium	rs615997	T	C	0.0511752	0.0106491	2.0268e-06	-0.0064	0.0145	0.658901
Lachnoclostridium	rs62285313	A	G	0.0864203	0.0181565	1.58332e-06	0.0278	0.0246	0.2594
Lachnoclostridium	rs78068103	A	G	0.0886199	0.0194248	3.66522e-06	0.0111	0.0293	0.7052
Lachnoclostridium	rs789029	C	T	-0.0641288	0.0137974	3.75327e-06	0.0153	0.0182	0.4012
Lachnospiraceae FCS020 group	rs10093861	G	A	-0.0568869	0.0121152	3.05626e-06	-0.0295	0.0141	0.0366201
Lachnospiraceae FCS020 group	rs1363769	C	T	0.200628	0.0449372	1.58161e-06	-0.0125	0.0332	0.7062
Lachnospiraceae FCS020 group	rs2862811	C	T	-0.0564927	0.0121736	3.91913e-06	-0.0001	0.0142	0.9951
Lachnospiraceae FCS020 group	rs35035870	T	C	-0.190615	0.0414403	2.62029e-06	0.0071	0.038	0.8517
Lachnospiraceae FCS020 group	rs7249113	G	A	0.0679483	0.0133496	3.721e-07	-0.0193	0.016	0.2293
Lachnospiraceae FCS020 group	rs72793667	A	G	-0.116881	0.0246589	1.63422e-06	-0.0174	0.0288	0.5445
Lachnospiraceae FCS020 group	rs9788306	C	T	-0.062804	0.0130744	1.38618e-06	-0.0033	0.0152	0.8273
Lachnospiraceae NC2004 group	rs12127733	G	A	0.115182	0.0246006	3.10592e-06	-0.0211	0.0184	0.2516
Lachnospiraceae NC2004 group	rs3756315	A	G	-0.0883469	0.0188397	3.32583e-06	0.0068	0.0155	0.6608
Lachnospiraceae NC2004 group	rs6116753	G	A	0.0994748	0.0209139	2.92247e-06	-0.0048	0.0167	0.774
Lachnospiraceae NK4A136	rs160061	G	A	-0.0513831	0.0108094	2.12197e-06	0.0126	0.0141	0.3715
Lachnospiraceae NK4A136	rs68104925	T	C	-0.0549104	0.0115385	2.36777e-06	0.0071	0.0148	0.631801
Lachnospiraceae NK4A136	rs73044693	A	G	-0.10758	0.0229884	3.57256e-06	-0.0336	0.0385	0.3833
Lachnospiraceae NK4A136	rs7616165	G	T	-0.230542	0.0483465	2.77389e-06	0.0363	0.0357	0.3087
Lachnospiraceae NK4A136	rs76193507	A	G	-0.22973	0.0499776	2.93089e-06	0.0581	0.0342	0.0896706
Lachnospiraceae NK4A136	rs7832116	A	G	-0.0714756	0.0151703	3.57084e-06	0.0148	0.0212	0.4845
Lachnospiraceae NK4A136	rs954878	A	G	-0.0520656	0.0109082	1.78201e-06	0.0127	0.0143	0.3734
Lachnospiraceae UCG001	rs2050911	G	A	0.0751466	0.0153934	1.10647e-06	0.0183	0.0154	0.2348
Lachnospiraceae UCG001	rs437876	T	C	0.0784637	0.0144768	7.16556e-08	-0.0294	0.0158	0.0618102
Lachnospiraceae UCG001	rs573933	T	C	-0.107898	0.0232346	3.10506e-06	-0.0405	0.0252	0.1082
Lachnospiraceae UCG001	rs74034332	G	A	0.168045	0.0382637	3.3335e-06	-0.0408	0.0395	0.3018
Lachnospiraceae UCG001	rs78848836	A	G	-0.118868	0.0259753	3.38174e-06	-0.0357	0.029	0.2179
Lachnospiraceae UCG001	rs9403580	C	T	0.107801	0.0229777	3.46785e-06	-0.0168	0.0234	0.4714
Lachnospiraceae UCG001	rs985416	T	C	-0.0970258	0.0181807	1.45589e-07	0.0011	0.0177	0.9513
Lachnospiraceae UCG004	rs11128180	A	G	0.0648288	0.0140126	4.51742e-06	-0.0176	0.0168	0.2955
Lachnospiraceae UCG004	rs12673420	G	A	0.0554351	0.0118375	2.98078e-06	0.0074	0.0145	0.611499
Lachnospiraceae UCG004	rs12747809	A	G	0.062197	0.0125685	8.64868e-07	-0.0099	0.0155	0.5208
Lachnospiraceae UCG004	rs12894272	G	A	-0.0579792	0.0125229	4.3395e-06	0.0359	0.0152	0.0183
Lachnospiraceae UCG004	rs2444793	T	C	0.0542433	0.0118188	4.77079e-06	0.012	0.0139	0.3875
Lachnospiraceae UCG004	rs2882478	G	A	-0.0577091	0.0118338	1.20812e-06	0.028	0.0146	0.05466
Lachnospiraceae UCG004	rs35182105	A	G	-0.109724	0.024221	4.86508e-06	0.0235	0.0326	0.47
Lachnospiraceae UCG008	rs10741777	T	C	-0.0973842	0.0194791	7.68652e-07	-0.0025	0.017	0.8843
Lachnospiraceae UCG008	rs10793103	T	C	-0.0974344	0.0181279	9.34932e-08	-0.0066	0.0157	0.673899
Lachnospiraceae UCG008	rs10801803	G	A	-0.117029	0.0243085	1.4003e-06	0.0182	0.0203	0.37
Lachnospiraceae UCG008	rs13024781	T	C	-0.0798769	0.0168846	2.29166e-06	0.0064	0.0141	0.649
Lachnospiraceae UCG008	rs57091572	A	G	-0.110443	0.0235801	2.85825e-06	-0.019	0.0203	0.3493
Lachnospiraceae UCG008	rs62277846	C	T	0.102292	0.0212319	1.58891e-06	0.0008	0.0176	0.9636
Lachnospiraceae UCG008	rs67078837	T	C	-0.0845848	0.0170693	7.68192e-07	-0.0032	0.0142	0.8225
Lachnospiraceae UCG008	rs955844	A	C	0.112064	0.0228369	1.80992e-06	-0.0152	0.0212	0.4748
Lachnospiraceae UCG010	rs10414815	C	T	-0.10453	0.0230253	4.23975e-06	-0.0282	0.0351	0.4226
Lachnospiraceae UCG010	rs11192447	A	G	0.126592	0.024345	4.68954e-07	-0.0459	0.0329	0.1634
Lachnospiraceae UCG010	rs12346653	C	T	0.0657686	0.0139569	2.70321e-06	-0.037	0.0164	0.0244399
Lachnospiraceae UCG010	rs74315802	G	T	0.0867262	0.0183477	3.19007e-06	0.0142	0.0252	0.5733
Lachnospiraceae UCG010	rs9981767	A	C	0.0655062	0.0131994	9.96369e-07	0.0423	0.0162	0.00888608
Lactobacillus	rs11674854	C	T	-0.0852686	0.0176504	1.59199e-06	0.0258	0.0153	0.0919708
Lactobacillus	rs1530559	G	A	0.0804001	0.0178207	4.93106e-06	0.0124	0.0151	0.4092
Lactobacillus	rs16861661	G	A	-0.183147	0.038148	1.27809e-06	0.0155	0.04	0.6977
Lactobacillus	rs62314653	C	A	0.187692	0.0394585	2.24383e-06	-0.0416	0.0344	0.2261
Lactobacillus	rs7399658	G	A	-0.107134	0.0221883	3.12097e-06	0.0244	0.0185	0.1888
Lactobacillus	rs768253	T	G	-0.079195	0.0171791	4.24766e-06	0.0024	0.0145	0.868
Lactobacillus	rs921925	A	C	0.0985077	0.0203229	9.71673e-07	0.0214	0.0172	0.2146
Lactococcus	rs10417872	G	T	-0.118306	0.024522	1.28677e-06	0.0403	0.016	0.0114699
Lactococcus	rs123059	C	T	0.13671	0.0274694	1.26561e-06	-0.0145	0.0193	0.453401
Lactococcus	rs2293361	C	T	-0.199221	0.0430969	1.39592e-06	0.011	0.028	0.6936
Lactococcus	rs4766997	C	T	0.114599	0.023839	2.06144e-06	-0.0042	0.0157	0.7901
Lactococcus	rs55910161	C	T	0.146426	0.0307367	2.36211e-06	0.0076	0.0199	0.7006
Lactococcus	rs7992246	C	T	-0.104232	0.0230786	4.44723e-06	-0.0017	0.0148	0.906
Marvinbryantia	rs1187983	C	T	-0.0935456	0.0193174	2.02428e-06	0.0283	0.0235	0.2275
Marvinbryantia	rs2724813	G	A	0.0840769	0.0167551	6.28449e-07	-0.0006	0.0184	0.9733
Marvinbryantia	rs2842896	C	T	-0.0649396	0.0131146	7.25371e-07	0.0014	0.0147	0.922
Marvinbryantia	rs2863363	G	A	-0.0634861	0.0136323	3.11279e-06	0.0042	0.0148	0.7783
Marvinbryantia	rs61884471	G	A	0.124426	0.0248431	1.01163e-06	-0.001	0.0277	0.9699
Marvinbryantia	rs72948274	A	C	-0.126354	0.0272212	3.25912e-06	0.0919	0.0317	0.00379603
Methanobrevibacter	rs10202904	G	T	0.112811	0.0239106	3.08546e-06	0.004	0.0142	0.7808
Methanobrevibacter	rs76029318	T	C	0.222849	0.0454319	1.07552e-06	-0.0267	0.0277	0.3347
Methanobrevibacter	rs894996	C	A	0.214213	0.0456045	3.81566e-06	0.0112	0.0283	0.692201
Odoribacter	rs10093869	A	G	-0.0577795	0.0125389	3.67443e-06	-0.0122	0.0155	0.4319
Odoribacter	rs28417404	A	G	-0.0726896	0.0161372	3.68036e-06	0.003	0.0204	0.8824
Odoribacter	rs77779484	G	A	-0.133489	0.0268526	6.56251e-07	-0.0775	0.032	0.0153699
Olsenella	rs1035588	A	G	-0.108148	0.0236848	4.85501e-06	-0.0018	0.0147	0.903
Olsenella	rs17148768	G	A	0.140434	0.0295602	2.19842e-06	0.0281	0.0183	0.1242
Olsenella	rs2759329	A	G	0.111131	0.0237218	3.43202e-06	-0.0099	0.0143	0.4866
Olsenella	rs35225860	A	G	-0.223604	0.0482391	3.87044e-06	0.0217	0.0345	0.528
Olsenella	rs6046522	C	T	0.122938	0.0269928	4.48456e-06	0.0118	0.0163	0.4696
Olsenella	rs62112538	C	T	-0.19943	0.0407033	1.1882e-06	-0.0242	0.028	0.3883
Olsenella	rs72691585	C	A	-0.249079	0.0520814	2.95291e-06	0.0277	0.0317	0.3824
Oscillibacter	rs11627628	T	C	0.143961	0.0290223	1.00921e-06	0.0038	0.0302	0.8986
Oscillibacter	rs11990279	T	C	-0.0824934	0.0180457	4.94299e-06	-0.0258	0.0166	0.1202
Oscillibacter	rs12649930	T	G	0.121589	0.0259612	4.09383e-06	-0.035	0.0249	0.1596
Oscillibacter	rs133832	A	C	-0.0795527	0.0162411	1.1472e-06	-0.0122	0.016	0.4464
Oscillibacter	rs16866406	A	G	0.0988765	0.0208795	3.07822e-06	0.0146	0.0203	0.4713
Oscillibacter	rs16934185	A	G	-0.129568	0.028157	4.38036e-06	0.0207	0.0265	0.4349
Oscillibacter	rs234108	A	G	0.0749553	0.0152632	9.16326e-07	0.0053	0.0146	0.7171
Oscillibacter	rs36095275	C	T	-0.0752368	0.0156861	1.39627e-06	-0.0073	0.0148	0.621999
Oscillibacter	rs4506202	G	A	0.0711323	0.0152261	3.20826e-06	-0.0168	0.0143	0.2381
Oscillibacter	rs61883564	A	G	-0.101351	0.0221016	3.38712e-06	0.0094	0.022	0.667999
Oscillibacter	rs761240	G	T	0.17664	0.0388812	2.0384e-06	-0.0262	0.0411	0.5232
Oscillibacter	rs9393920	G	A	0.0744662	0.0151081	9.92247e-07	-0.0081	0.0143	0.573099
Oscillospira	rs12206468	G	A	-0.133016	0.0269733	1.04222e-06	0.0183	0.0267	0.4929
Oscillospira	rs1954532	C	T	0.0826246	0.0175252	2.26772e-06	-0.0024	0.0187	0.8983
Oscillospira	rs28889936	A	C	0.114051	0.0252838	3.36589e-06	0.0424	0.0263	0.1065
Oxalobacter	rs10464997	G	A	0.137691	0.0294804	3.29754e-06	-0.0358	0.0221	0.1045
Oxalobacter	rs11108500	A	G	-0.199099	0.0427327	3.74283e-06	-0.0416	0.0317	0.189
Oxalobacter	rs12002250	A	C	0.217122	0.0466317	1.41504e-06	0.0505	0.0314	0.1083
Oxalobacter	rs1569853	T	C	-0.138078	0.0296981	3.64502e-06	-0.0161	0.02	0.4199
Oxalobacter	rs36057338	G	T	0.207847	0.0421439	8.79812e-07	0.0133	0.0279	0.6329
Oxalobacter	rs4428215	G	A	0.130293	0.0242237	7.51069e-08	-0.0084	0.0165	0.6111
Oxalobacter	rs6000536	C	T	-0.130992	0.0253804	2.06054e-07	-0.0106	0.0177	0.5506
Oxalobacter	rs736744	T	C	-0.117882	0.0211262	2.57472e-08	-0.0172	0.0146	0.2379
Parabacteroides	rs115602804	G	A	0.10308	0.0222736	1.93059e-06	-0.0362	0.0297	0.2227
Parabacteroides	rs4236095	A	G	-0.0761961	0.0157042	1.93143e-06	0.0194	0.0211	0.3589
Parabacteroides	rs60884758	C	T	-0.0702667	0.0142249	5.7069e-07	0.0332	0.0191	0.08284
Paraprevotella	rs140997932	T	C	-0.162376	0.0354178	2.1112e-06	0.0025	0.0299	0.9339
Paraprevotella	rs145020347	A	G	-0.12465	0.0262323	4.03005e-06	-0.0203	0.025	0.417
Paraprevotella	rs17785622	A	G	0.248065	0.0524304	1.92659e-06	-0.0548	0.0338	0.105
Paraprevotella	rs2081023	A	G	-0.122561	0.0236507	2.63797e-07	-0.0082	0.0219	0.7074
Paraprevotella	rs3008582	T	C	0.10572	0.0227246	4.35993e-06	0.0474	0.0211	0.0249701
Paraprevotella	rs4756632	G	T	-0.138905	0.0289897	3.81751e-06	-0.0369	0.0264	0.1617
Paraprevotella	rs4767113	C	T	0.0882466	0.018382	2.14358e-06	-0.0112	0.0157	0.4749
Paraprevotella	rs9602779	A	C	-0.106692	0.0220264	6.9274e-07	0.0008	0.0184	0.9662
Paraprevotella	rs9900242	A	G	-0.0852967	0.0175212	1.14067e-06	-0.0039	0.0143	0.785899
Parasutterella	rs10899911	A	G	-0.0717102	0.0148151	1.15271e-06	0.0105	0.0161	0.5153
Parasutterella	rs2090816	C	A	-0.0840967	0.0177315	2.89714e-06	-0.03	0.0188	0.1113
Parasutterella	rs2387977	T	C	-0.0681778	0.0134756	5.38481e-07	0.0168	0.0152	0.2698
Parasutterella	rs35055552	T	C	0.109554	0.0235433	3.3485e-06	0.0386	0.0292	0.1858
Parasutterella	rs55877868	A	C	-0.104458	0.0228089	2.87071e-06	0.0133	0.025	0.5951
Parasutterella	rs6828768	C	T	0.0636852	0.0132645	1.78328e-06	0.0015	0.0143	0.9188
Parasutterella	rs7303158	C	T	0.0646859	0.0134256	1.32776e-06	0.0095	0.0142	0.502599
Parasutterella	rs7572229	A	G	-0.066273	0.0132736	6.31699e-07	-0.0185	0.0144	0.2013
Parasutterella	rs78383039	T	C	-0.146315	0.0297119	1.57438e-06	-0.0219	0.0302	0.4674
Parasutterella	rs8039785	G	T	-0.0618345	0.0133	3.62093e-06	0.0025	0.014	0.8562
Parasutterella	rs823424	G	A	-0.0713448	0.0156958	4.95291e-06	-0.025	0.0172	0.1457
Peptococcus	rs10031059	C	T	0.121167	0.0225844	1.23637e-07	0.0119	0.017	0.4847
Peptococcus	rs11001941	G	A	-0.195611	0.0392217	1.32859e-06	-0.0121	0.0295	0.681201
Peptococcus	rs2054133	A	G	-0.0895433	0.0188332	2.14166e-06	0.0054	0.0157	0.7293
Peptococcus	rs413827	G	A	0.110229	0.0237523	3.30088e-06	0.0061	0.0177	0.7319
Peptococcus	rs5770862	T	C	0.162018	0.0356813	3.21959e-06	0.0226	0.0281	0.4218
Peptococcus	rs6918730	A	G	-0.135311	0.0289742	1.14731e-06	-0.0233	0.0219	0.2871
Peptococcus	rs7033353	G	T	-0.090152	0.018995	2.21958e-06	-0.0011	0.0145	0.9402
Peptococcus	rs77681628	C	T	0.200307	0.0387328	2.68838e-07	-0.0021	0.0318	0.9474
Phascolarctobacterium	rs12618201	A	G	0.0641657	0.0138202	3.37699e-06	0.0091	0.0144	0.5271
Phascolarctobacterium	rs1264476	G	T	-0.0767335	0.0166041	4.29566e-06	-0.0024	0.0173	0.8909
Phascolarctobacterium	rs56069061	G	A	-0.111306	0.0230694	1.87176e-06	0.0223	0.0318	0.4832
Phascolarctobacterium	rs56157888	A	C	0.0954864	0.0193976	1.08505e-06	-0.0006	0.0205	0.9782
Phascolarctobacterium	rs74540770	G	A	-0.121014	0.0258621	3.60272e-06	-0.0301	0.0273	0.2708
Phascolarctobacterium	rs75882962	T	C	0.0968661	0.0190575	3.18985e-07	0.0039	0.0209	0.8535
Prevotella7	rs2240542	C	T	0.12085	0.0261776	4.8415e-06	0.0221	0.0156	0.1563
Prevotella7	rs430270	A	C	0.139155	0.0297055	2.86847e-06	0.017	0.0184	0.3564
Prevotella7	rs57404562	C	A	0.155486	0.0316057	6.2157e-07	-0.0128	0.0185	0.4878
Prevotella7	rs9608249	A	G	-0.158213	0.0336317	2.06685e-06	-0.0063	0.0209	0.7619
Prevotella7	rs9959718	G	A	0.133012	0.0275361	1.9006e-06	0.0324	0.0163	0.0474602
Prevotella9	rs111509883	T	C	0.171131	0.0347624	1.24388e-06	0.0222	0.0485	0.647301
Prevotella9	rs11685699	C	T	-0.141357	0.0295665	2.02554e-06	-0.0507	0.0294	0.0849396
Prevotella9	rs117271932	A	G	0.208089	0.0440393	2.81722e-06	-0.0306	0.0337	0.3638
Prevotella9	rs2683313	G	A	0.0724576	0.0151603	1.68896e-06	-0.0052	0.0152	0.7341
Prevotella9	rs746764	T	C	-0.0915771	0.0193245	2.04e-06	0.0298	0.0184	0.1052
Prevotella9	rs9428102	A	G	-0.0778845	0.0176068	4.61732e-06	-0.0049	0.0172	0.7758
Rikenellaceae RC9 gut group	rs17582787	A	G	-0.157739	0.0339924	3.55378e-06	0.0229	0.0197	0.2454
Rikenellaceae RC9 gut group	rs2900503	T	G	0.172329	0.0326671	1.55282e-07	0.0343	0.0188	0.0681506
Rikenellaceae RC9 gut group	rs2998141	C	T	0.136346	0.0293073	4.42374e-06	-0.0282	0.0194	0.1457
Rikenellaceae RC9 gut group	rs4717843	G	T	-0.119376	0.0260548	4.71726e-06	-0.0059	0.0222	0.7897
Rikenellaceae RC9 gut group	rs80309088	G	A	0.17405	0.0383423	4.55638e-06	0.0029	0.0218	0.8946
Rikenellaceae RC9 gut group	rs9887954	G	A	-0.114849	0.0249013	4.80806e-06	-0.0102	0.0146	0.4847
Romboutsia	rs10279978	A	G	-0.0622202	0.0127675	1.17009e-06	-0.0335	0.0183	0.0667406
Romboutsia	rs61841503	G	A	0.092888	0.0171454	3.99595e-08	0.0017	0.0197	0.9299
Romboutsia	rs62504452	A	G	-0.0710048	0.0156654	4.65833e-06	-0.0094	0.019	0.621299
Roseburia	rs16910295	T	C	-0.0980434	0.020957	2.91112e-06	0.0294	0.0296	0.3201
Roseburia	rs2160994	C	T	-0.0550687	0.0112481	9.6984e-07	-0.0041	0.0151	0.7871
Roseburia	rs2943022	T	C	0.0493786	0.0106763	4.11405e-06	0.0081	0.0142	0.567
Roseburia	rs6445851	A	G	0.0497336	0.0108158	3.5272e-06	0.0158	0.0143	0.2681
Roseburia	rs6930661	C	T	-0.0961587	0.0204975	2.47942e-06	0.0285	0.0277	0.3029
Roseburia	rs9300744	C	T	-0.0588452	0.0126228	4.75116e-06	-0.0265	0.0167	0.1117
Ruminiclostridium5	rs10827477	A	G	-0.0547387	0.0115163	2.1918e-06	0.0132	0.0155	0.3941
Ruminiclostridium5	rs113753996	T	C	0.0820689	0.0174463	3.98896e-06	0.0346	0.0237	0.1446
Ruminiclostridium5	rs1492620	T	C	-0.0830505	0.0180073	3.52574e-06	-0.0102	0.0256	0.6901
Ruminiclostridium5	rs2482038	C	A	0.0518991	0.0108777	1.70314e-06	0.0004	0.0139	0.9772
Ruminiclostridium5	rs6121460	G	A	0.0932955	0.0199206	2.64107e-06	-0.0171	0.0385	0.657301
Ruminiclostridium5	rs79968837	A	G	-0.0950311	0.0193507	1.14623e-06	0.0144	0.0263	0.5836
Ruminiclostridium6	rs10829821	T	C	-0.097606	0.0216072	3.47144e-06	0.0033	0.0273	0.9037
Ruminiclostridium6	rs11992182	A	C	0.0625299	0.0137876	4.64836e-06	-0.0355	0.016	0.0262803
Ruminiclostridium6	rs1756364	G	T	0.0999189	0.0197169	2.53653e-07	0.0882	0.0363	0.01508
Ruminiclostridium6	rs61060922	T	G	0.15913	0.0322283	1.08648e-06	0.0328	0.0311	0.2913
Ruminiclostridium6	rs663262	C	T	0.13498	0.0310715	3.39414e-06	0.0422	0.0315	0.1803
Ruminiclostridium6	rs71414120	T	G	0.200894	0.0406434	1.07696e-06	0.0064	0.0363	0.861
Ruminiclostridium6	rs72991535	T	G	0.135604	0.0295174	4.9537e-06	-0.0077	0.0334	0.8165
Ruminiclostridium6	rs77193512	A	G	0.0736533	0.0153163	1.29587e-06	-0.0004	0.0183	0.9807
Ruminiclostridium6	rs79968172	G	A	0.11614	0.0243083	1.66054e-06	-0.0453	0.0306	0.1378
Ruminiclostridium9	rs115044523	G	A	-0.0980026	0.0202616	2.37203e-06	-0.0346	0.0255	0.1751
Ruminiclostridium9	rs12040548	G	T	0.0570422	0.0122359	3.14869e-06	0.0213	0.0161	0.1854
Ruminiclostridium9	rs6082461	C	A	-0.0586425	0.0131004	4.86598e-06	-0.0121	0.017	0.4758
Ruminiclostridium9	rs918449	G	A	0.0950908	0.0197177	2.55994e-06	-0.0179	0.0269	0.506499
Ruminiclostridium9	rs9522712	T	C	0.0699728	0.0154939	4.65961e-06	-0.0114	0.0195	0.558
Ruminococcaceae NK4A214 group	rs11586410	G	A	-0.0863422	0.0169937	3.66277e-07	0.0057	0.0241	0.8121
Ruminococcaceae NK4A214 group	rs12642039	C	T	0.0553003	0.0119397	3.43005e-06	-0.0257	0.0149	0.0847305
Ruminococcaceae NK4A214 group	rs12731	A	G	-0.0527684	0.0115053	4.87237e-06	-0.0152	0.0139	0.2746
Ruminococcaceae NK4A214 group	rs136761	A	G	0.0587521	0.0119155	8.15192e-07	-0.0086	0.0152	0.569399
Ruminococcaceae NK4A214 group	rs147475196	A	G	-0.133769	0.0295196	4.72498e-06	-0.0447	0.0387	0.2474
Ruminococcaceae NK4A214 group	rs35559912	T	C	-0.0925071	0.0203674	4.89024e-06	0.0075	0.0295	0.8001
Ruminococcaceae NK4A214 group	rs4814689	C	T	-0.1083	0.0230708	4.55187e-06	-0.0466	0.0271	0.0856702
Ruminococcaceae NK4A214 group	rs5994253	A	G	-0.0811302	0.0157621	2.35185e-07	0.0045	0.0222	0.8394
Ruminococcaceae NK4A214 group	rs7573569	T	C	0.107739	0.0233638	3.23139e-06	0.0119	0.0288	0.6789
Ruminococcaceae UCG002	rs10916131	C	T	-0.069333	0.0146753	2.87495e-06	0.0025	0.0192	0.8973
Ruminococcaceae UCG002	rs10927423	C	A	-0.0713617	0.0147712	8.49513e-07	0.0033	0.0194	0.8649
Ruminococcaceae UCG002	rs116974815	C	A	-0.189731	0.0396566	2.02516e-06	0.0589	0.0379	0.1203
Ruminococcaceae UCG002	rs11750293	G	T	-0.0578304	0.0120512	1.76137e-06	-0.0171	0.0166	0.303
Ruminococcaceae UCG002	rs12463378	A	G	-0.0522061	0.0112086	2.95522e-06	-0.0096	0.0153	0.5312
Ruminococcaceae UCG002	rs55793120	T	C	0.137396	0.027414	4.80673e-07	0.001	0.0348	0.9765
Ruminococcaceae UCG002	rs7120052	A	C	0.0624796	0.0135523	1.96897e-06	0.0127	0.0186	0.494399
Ruminococcaceae UCG002	rs7155595	C	A	0.0569929	0.0116986	1.14932e-06	0.0061	0.0155	0.695799
Ruminococcaceae UCG002	rs77564310	A	C	-0.0713093	0.0140855	3.28617e-07	-0.012	0.018	0.5059
Ruminococcaceae UCG002	rs79016051	C	T	-0.0887747	0.0189424	2.33744e-06	-0.0112	0.0275	0.6836
Ruminococcaceae UCG003	rs10490280	C	T	-0.0672094	0.0143309	4.15547e-06	0.0042	0.0176	0.8102
Ruminococcaceae UCG003	rs11243416	T	C	-0.0925653	0.0191203	1.66882e-06	0.0078	0.0236	0.741
Ruminococcaceae UCG003	rs11613919	G	T	0.0727604	0.0155716	1.6251e-06	-0.0084	0.0192	0.6599
Ruminococcaceae UCG003	rs16959793	A	C	-0.062527	0.0131259	2.21707e-06	0.0007	0.0158	0.9637
Ruminococcaceae UCG003	rs3013089	G	A	-0.0551473	0.0120346	4.38137e-06	-0.0216	0.0146	0.14
Ruminococcaceae UCG003	rs4452755	A	C	-0.0634463	0.0134741	3.29337e-06	0.018	0.0159	0.2582
Ruminococcaceae UCG003	rs4532474	G	A	0.0769231	0.017045	4.82125e-06	0.0211	0.0214	0.3248
Ruminococcaceae UCG003	rs646327	G	A	0.0586696	0.0118369	7.83177e-07	0.0155	0.0142	0.2743
Ruminococcaceae UCG003	rs6759615	A	G	0.102523	0.0200204	7.86231e-07	-0.0136	0.0264	0.6067
Ruminococcaceae UCG003	rs73341549	T	C	-0.169857	0.0318768	1.50952e-07	-0.0065	0.0314	0.8358
Ruminococcaceae UCG004	rs12125734	G	T	0.133972	0.0257416	2.09426e-07	0.0146	0.0242	0.5464
Ruminococcaceae UCG004	rs511258	G	A	-0.0757474	0.0162475	4.52054e-06	-0.0242	0.0164	0.1398
Ruminococcaceae UCG004	rs6769553	A	G	0.0849743	0.0157451	7.91061e-08	-0.0092	0.0157	0.5592
Ruminococcaceae UCG005	rs10873449	C	T	-0.0654843	0.0143973	4.11169e-06	-0.0058	0.0189	0.757501
Ruminococcaceae UCG005	rs10950694	C	T	-0.0577628	0.011412	4.29804e-07	0.0205	0.0145	0.1581
Ruminococcaceae UCG005	rs114279581	A	G	-0.146604	0.0316034	3.21855e-06	0.003	0.0319	0.9258
Ruminococcaceae UCG005	rs12288512	A	G	0.066635	0.0144356	3.10277e-06	-0.0073	0.0187	0.6951
Ruminococcaceae UCG005	rs12458218	T	C	0.0677322	0.0144525	2.41024e-06	0.0296	0.0179	0.0990193
Ruminococcaceae UCG005	rs2893871	G	A	-0.073644	0.015548	3.53843e-06	0.0077	0.0203	0.7053
Ruminococcaceae UCG005	rs34781347	G	A	0.188685	0.0386484	6.04728e-07	-0.0186	0.0335	0.5775
Ruminococcaceae UCG005	rs7449320	C	A	0.0599163	0.0130836	4.80773e-06	0.0012	0.0173	0.9456
Ruminococcaceae UCG005	rs7555878	G	A	-0.0586677	0.0125277	2.81022e-06	0.0159	0.0161	0.3245
Ruminococcaceae UCG009	rs12508214	C	T	-0.0774649	0.0168937	4.75488e-06	0.0255	0.0171	0.137
Ruminococcaceae UCG009	rs1550196	A	G	-0.130842	0.0262478	1.13287e-06	0.0431	0.0246	0.0803804
Ruminococcaceae UCG009	rs2058609	G	A	-0.0816464	0.017472	3.12486e-06	0.0201	0.0153	0.1873
Ruminococcaceae UCG009	rs2192926	A	G	-0.089048	0.0192989	4.87742e-06	-0.0162	0.0164	0.3233
Ruminococcaceae UCG009	rs4079028	C	T	0.0915623	0.019936	3.28246e-06	-0.0064	0.0176	0.717799
Ruminococcaceae UCG009	rs4708333	T	G	-0.084033	0.0174757	1.56246e-06	0.0311	0.0155	0.0448601
Ruminococcaceae UCG010	rs12597105	A	G	-0.0670855	0.0144415	4.87304e-06	-0.0181	0.0164	0.271
Ruminococcaceae UCG010	rs2820282	C	A	0.0592304	0.0125917	2.85384e-06	-0.0047	0.015	0.755699
Ruminococcaceae UCG010	rs682403	A	G	-0.0588161	0.0124671	2.36537e-06	-0.0001	0.0139	0.9939
Ruminococcaceae UCG010	rs6958419	C	T	-0.0585718	0.0124994	2.84165e-06	0.0193	0.014	0.1686
Ruminococcaceae UCG011	rs12636310	G	A	0.132725	0.0282037	2.81235e-06	0.011	0.0173	0.5244
Ruminococcaceae UCG011	rs12724320	C	T	-0.120881	0.0249229	1.51985e-06	-0.0235	0.0152	0.1208
Ruminococcaceae UCG011	rs1416041	A	C	-0.182339	0.0339898	7.04417e-08	0.0091	0.0203	0.654
Ruminococcaceae UCG011	rs2729556	T	C	0.109097	0.0233699	3.18676e-06	-0.0233	0.0149	0.1186
Ruminococcaceae UCG011	rs79113084	C	T	-0.152166	0.0317519	2.06125e-06	-0.0175	0.0214	0.413
Ruminococcaceae UCG011	rs9729514	G	A	-0.184934	0.0394616	2.36772e-06	-0.0014	0.0242	0.954
Ruminococcaceae UCG013	rs11581881	C	T	0.0661211	0.0144736	4.72585e-06	0.0359	0.0217	0.0985803
Ruminococcaceae UCG013	rs12189346	G	A	0.0684961	0.014558	1.67954e-06	-0.0196	0.0204	0.3383
Ruminococcaceae UCG013	rs12485353	G	A	-0.0607903	0.0130847	4.19382e-06	0.0157	0.0176	0.3706
Ruminococcaceae UCG013	rs12781711	C	T	-0.0656129	0.0117477	2.553e-08	0.005	0.015	0.7391
Ruminococcaceae UCG013	rs16918863	A	C	0.111491	0.0240157	4.15499e-06	0.0736	0.029	0.0111499
Ruminococcaceae UCG013	rs75088940	T	C	-0.0942968	0.0200712	2.55399e-06	0.0388	0.0263	0.1407
Ruminococcaceae UCG013	rs76973485	G	T	0.194976	0.0418213	3.34981e-06	0.0022	0.0352	0.9505
Ruminococcaceae UCG014	rs10941294	C	T	-0.122057	0.0260017	2.39701e-06	-0.0423	0.0328	0.1976
Ruminococcaceae UCG014	rs115777838	T	C	-0.18835	0.0386643	4.62328e-07	0.0617	0.0364	0.0899498
Ruminococcaceae UCG014	rs12638134	T	G	0.0582548	0.0119657	1.21143e-06	0.0028	0.014	0.8429
Ruminococcaceae UCG014	rs56105232	G	A	0.139276	0.0299132	2.9128e-06	-0.0711	0.0422	0.0921807
Ruminococcaceae UCG014	rs72809222	T	C	0.0671775	0.0139838	2.4119e-06	-0.0093	0.0167	0.5801
Ruminococcaceae UCG014	rs995642	C	T	0.060048	0.0126417	1.90222e-06	0.0186	0.0153	0.2232
Ruminococcus gauvreauii group	rs10931481	A	G	-0.0610096	0.0130484	3.38213e-06	-0.0138	0.015	0.3579
Ruminococcus gauvreauii group	rs12539819	C	T	0.110654	0.0240684	4.49376e-06	-0.049	0.041	0.2318
Ruminococcus gauvreauii group	rs1391597	C	T	0.0590284	0.0124874	1.85964e-06	-0.006	0.0148	0.6842
Ruminococcus gauvreauii group	rs2047242	A	G	-0.067603	0.0133738	2.46371e-07	-0.0038	0.0157	0.8097
Ruminococcus gauvreauii group	rs289410	A	G	0.0654926	0.0139101	2.27463e-06	-0.0283	0.0164	0.0848106
Ruminococcus gauvreauii group	rs71386687	T	G	0.121037	0.02386	2.90764e-07	0.0294	0.0352	0.4036
Ruminococcus gauvreauii group	rs9870933	G	A	-0.0621643	0.0126072	8.49122e-07	-0.0046	0.0144	0.7487
Ruminococcus gnavus group	rs12136548	C	T	0.0901946	0.0196476	3.09628e-06	0.01	0.0152	0.5096
Ruminococcus gnavus group	rs13163520	G	A	-0.127377	0.0233883	5.61009e-08	-0.0044	0.0187	0.8123
Ruminococcus gnavus group	rs2909242	A	C	0.0909965	0.018351	7.40952e-07	0.0103	0.0149	0.4869
Ruminococcus gnavus group	rs3124783	G	A	0.11599	0.0249099	2.6652e-06	-0.0128	0.0208	0.5381
Ruminococcus gnavus group	rs62167033	T	C	0.185289	0.0396295	3.49526e-06	0.0688	0.0315	0.0290503
Ruminococcus gnavus group	rs934940	A	C	-0.105045	0.0229588	2.73703e-06	0.0183	0.019	0.3356
Ruminococcus gnavus group	rs9872758	T	C	0.0849233	0.0176643	1.66027e-06	0.0024	0.0144	0.8699
Ruminococcus torques group	rs10904297	A	G	-0.167804	0.0389812	2.68714e-06	0.006	0.041	0.8843
Ruminococcus torques group	rs12434631	A	G	0.074697	0.0153401	2.77249e-06	-0.0166	0.0295	0.5732
Ruminococcus torques group	rs35866622	T	C	-0.0612024	0.0109421	2.21335e-08	0.0139	0.0142	0.3275
Ruminococcus torques group	rs4073731	T	C	0.0651948	0.0142221	4.05247e-06	0.0027	0.0199	0.8931
Ruminococcus torques group	rs8080469	G	A	0.0490727	0.0107036	3.49526e-06	-0.0148	0.0141	0.2939
Ruminococcus1	rs11783695	G	T	-0.0734114	0.0161398	4.72683e-06	-0.0399	0.0211	0.0585504
Ruminococcus1	rs17781867	C	T	0.0999271	0.0211728	1.96336e-06	-0.0433	0.0357	0.2258
Ruminococcus1	rs6493760	T	C	-0.0535262	0.0115885	3.38361e-06	0.0287	0.0158	0.0685804
Ruminococcus1	rs7117576	A	G	0.0829505	0.0170891	6.47978e-07	0.0148	0.0247	0.5495
Ruminococcus1	rs7583465	C	T	0.0527654	0.0112619	2.55611e-06	0.0164	0.0144	0.2565
Ruminococcus2	rs12986628	T	C	-0.0665937	0.0140168	2.142e-06	-0.0011	0.0184	0.9517
Ruminococcus2	rs2368224	T	G	0.199648	0.0438453	3.62928e-06	-0.0013	0.0399	0.9743
Ruminococcus2	rs2997412	G	A	0.0568439	0.0122325	4.22114e-06	0.009	0.0152	0.5549
Ruminococcus2	rs58681734	A	G	0.0723875	0.0160787	4.18177e-06	-0.0072	0.0213	0.7356
Ruminococcus2	rs75140805	T	G	0.0836825	0.0176445	3.95294e-06	0.0255	0.0302	0.3992
Ruminococcus2	rs7635831	G	A	0.0618344	0.0129031	1.98052e-06	0.0042	0.0184	0.8209
Ruminococcus2	rs78120384	A	G	-0.192815	0.0392045	3.31184e-07	-0.0732	0.0388	0.0594593
Sellimonas	rs13417181	T	C	0.166509	0.0337521	7.61746e-07	-0.0295	0.0313	0.3463
Sellimonas	rs2016057	C	A	0.125878	0.0256153	1.02698e-06	-0.0009	0.0143	0.95
Sellimonas	rs2187447	A	C	0.243457	0.0527695	3.97805e-06	-0.0283	0.0317	0.372
Sellimonas	rs2371572	A	C	0.127349	0.0250862	4.46355e-07	-0.0106	0.0142	0.4565
Sellimonas	rs4600608	G	A	0.137152	0.0301702	4.94846e-06	0.0074	0.0179	0.6804
Sellimonas	rs56203279	T	C	-0.124045	0.0269115	3.71997e-06	0.0109	0.0155	0.4823
Slackia	rs12440440	A	G	0.0901934	0.0190582	2.62869e-06	0.0013	0.0146	0.929
Slackia	rs16894137	C	T	-0.122792	0.0263047	2.71181e-06	0.0289	0.0202	0.1514
Slackia	rs4492265	G	A	0.0905757	0.0191658	2.40924e-06	-0.0001	0.0152	0.9966
Slackia	rs8901	C	T	0.0934594	0.0186813	6.07002e-07	0.0018	0.0144	0.9031
Streptococcus	rs10448310	A	G	-0.0517935	0.0111324	3.30704e-06	0.0011	0.0144	0.9374
Streptococcus	rs11110281	T	C	-0.137519	0.0227398	2.58315e-09	-0.0435	0.029	0.1333
Streptococcus	rs11720390	G	A	0.107024	0.0228121	3.59484e-06	-0.019	0.0292	0.5138
Streptococcus	rs11764382	A	G	-0.0695345	0.0143671	1.28632e-06	0.0195	0.0185	0.2923
Streptococcus	rs17708276	A	G	-0.0793955	0.0170628	3.04096e-06	-0.0433	0.0211	0.0403999
Streptococcus	rs1918540	A	G	-0.059639	0.0128148	2.44068e-06	-0.009	0.0165	0.583899
Streptococcus	rs4968759	A	G	-0.0515109	0.0112068	3.7812e-06	0.0051	0.0145	0.727699
Streptococcus	rs6806351	T	C	-0.0633829	0.0136647	4.93867e-06	0.0132	0.0171	0.4401
Streptococcus	rs72739637	A	G	0.0959942	0.0193213	1.03307e-06	-0.0253	0.0237	0.2875
Streptococcus	rs7916711	A	G	0.102891	0.0217362	2.717e-06	-0.0161	0.0308	0.5997
Streptococcus	rs9903102	C	A	-0.0709483	0.0155275	4.17994e-06	-0.0131	0.0216	0.543
Subdoligranulum	rs10065321	T	C	-0.0512828	0.0108105	2.10155e-06	-0.0152	0.0143	0.2874
Subdoligranulum	rs12590825	C	A	-0.0525287	0.0109942	2.07888e-06	0.0113	0.0149	0.4459
Subdoligranulum	rs2114677	C	T	-0.104176	0.0230829	2.71725e-06	0.0188	0.0289	0.5158
Subdoligranulum	rs2171249	C	T	0.106744	0.0233213	4.50557e-06	-0.0241	0.031	0.4355
Subdoligranulum	rs3761728	G	T	0.0543458	0.0118866	3.8675e-06	0.0097	0.0161	0.5482
Subdoligranulum	rs4347804	G	A	-0.166063	0.0357483	2.18404e-06	0.0475	0.0378	0.208
Subdoligranulum	rs6555306	C	T	0.0740777	0.0155463	2.80666e-06	0.0376	0.0209	0.0723502
Sutterella	rs13173038	A	G	-0.0718076	0.0151627	2.72986e-06	0.002	0.0178	0.9108
Sutterella	rs143438747	T	C	-0.145793	0.0306867	3.2802e-06	0.0194	0.0345	0.574101
Sutterella	rs2321387	G	A	-0.0592876	0.0124509	1.86518e-06	0.0043	0.0148	0.7728
Sutterella	rs7499539	A	G	0.0617478	0.0130998	2.35771e-06	0.0313	0.0153	0.0414105
Turicibacter	rs11054680	T	C	-0.104751	0.0226997	2.30978e-06	-0.0086	0.0227	0.7045
Turicibacter	rs12603364	T	C	0.110861	0.0225598	8.66603e-07	0.039	0.0214	0.06827
Turicibacter	rs149744580	A	G	0.169883	0.0315478	7.00971e-08	0.0365	0.0322	0.257
Turicibacter	rs2834977	T	C	-0.0959995	0.0208261	3.95585e-06	0.0156	0.0203	0.4435
Turicibacter	rs4869133	G	A	0.131186	0.027197	2.5537e-06	-0.0229	0.0266	0.3893
Turicibacter	rs55756211	T	C	-0.115115	0.0240708	2.8053e-06	-0.0117	0.0234	0.617999
Tyzzerella3	rs17706273	T	C	-0.140368	0.0274708	5.87814e-07	0.0074	0.0204	0.716199
Tyzzerella3	rs4904512	T	C	-0.117151	0.0250306	3.09272e-06	0.0236	0.0186	0.2033
Tyzzerella3	rs55799124	A	G	-0.11435	0.0238604	1.33549e-06	-0.0132	0.0191	0.4876
Tyzzerella3	rs67476743	T	G	0.132164	0.022208	3.7405e-09	-0.0233	0.0187	0.2124
Tyzzerella3	rs6920448	C	T	-0.141081	0.0305446	4.15375e-06	0.0581	0.0246	0.0183899
Tyzzerella3	rs7019909	T	C	0.144156	0.0301626	1.76121e-06	0.017	0.0232	0.4623
Tyzzerella3	rs7333521	T	C	-0.207191	0.0453121	4.87607e-06	0.037	0.0309	0.2311
Tyzzerella3	rs75091807	G	T	-0.184966	0.0383029	1.70675e-06	-0.0127	0.0281	0.651
Tyzzerella3	rs7561370	C	T	-0.131341	0.0286292	1.51604e-06	0.0205	0.0216	0.3441
Veillonella	rs1882878	A	G	-0.0768966	0.0163908	2.98092e-06	-0.0027	0.0157	0.8641
Veillonella	rs2013594	C	T	0.0720698	0.0155153	3.42129e-06	0.0065	0.0154	0.673899
Veillonella	rs62376424	C	T	-0.0762216	0.0163499	3.65452e-06	0.0238	0.0152	0.1179
Veillonella	rs742016	A	G	-0.0688571	0.0149769	4.65693e-06	-0.0033	0.015	0.8241
Victivallis	rs11899949	G	A	0.130568	0.0276239	2.76707e-06	0.0155	0.0163	0.3423
Victivallis	rs12512543	A	C	-0.178036	0.0374344	2.54132e-06	-0.0078	0.0233	0.738901
Victivallis	rs4764863	G	A	0.121561	0.0246058	8.22224e-07	-0.0266	0.0141	0.0596499
Victivallis	rs4895919	C	T	0.116918	0.0247515	2.75201e-06	-0.0136	0.0149	0.3602
Victivallis	rs56349194	A	G	-0.158501	0.0315231	6.25749e-07	0.0176	0.0189	0.3501
