# Supplementary material for: Association of gut microbiota with age-related macular degeneration and glaucoma: a bidirectional Mendelian randomization study
Source: Preprints.org preprint supplement (doi:10.20944/preprints202310.0525.v1), 2023-10-09
Supplement: Supplementary file 4 [file S3 MR estimates of bacteria on AMD.xlsx]

## Sheet: Sheet1
Table S3. MR estimates of bacteria on AMD.
Bacterial taxa (Exposures)		AMD (outcome)
	Methods	SNP	OR	95% CI	P
Adlercreutzia	MR Egger	4	1.17156	0.28-4.92	0.848818
Adlercreutzia	Weighted median	4	1.09351	0.87-1.38	0.452472
Adlercreutzia	Inverse variance weighted	4	1.04218	0.78-1.40	0.784379
Adlercreutzia	Simple mode	4	1.26287	0.77-2.06	0.418534
Adlercreutzia	Weighted mode	4	1.26746	0.84-1.92	0.344253
Akkermansia	MR Egger	8	1.01698	0.72-1.44	0.927724
Akkermansia	Weighted median	8	0.918597	0.79-1.06	0.257552
Akkermansia	Inverse variance weighted	8	0.926327	0.83-1.03	0.171904
Akkermansia	Simple mode	8	0.915595	0.74-1.14	0.453264
Akkermansia	Weighted mode	8	0.917613	0.75-1.13	0.439094
Alistipes	MR Egger	5	0.347018	0.04-2.74	0.389428
Alistipes	Weighted median	5	1.14876	0.81-1.62	0.428635
Alistipes	Inverse variance weighted	5	1.12606	0.87-1.45	0.361592
Alistipes	Simple mode	5	1.32267	0.80-2.19	0.337292
Alistipes	Weighted mode	5	1.29562	0.80-2.10	0.354058
Allisonella	MR Egger	4	2.48426	1.16-5.32	0.144066
Allisonella	Weighted median	4	1.11518	0.97-1.28	0.127097
Allisonella	Inverse variance weighted	4	1.04236	0.88-1.23	0.622898
Allisonella	Simple mode	4	1.13773	0.87-1.48	0.410264
Allisonella	Weighted mode	4	1.15163	0.95-1.40	0.255546
Anaerofilum	MR Egger	6	0.408099	0.21-0.79	0.0562077
Anaerofilum	Weighted median	6	0.984075	0.83-1.16	0.850906
Anaerofilum	Inverse variance weighted	6	0.992547	0.83-1.18	0.933996
Anaerofilum	Simple mode	6	0.863362	0.62-1.20	0.424827
Anaerofilum	Weighted mode	6	0.872989	0.64-1.19	0.434999
Anaerostipes	MR Egger	10	1.70162	0.80-1.19	0.20269
Anaerostipes	Weighted median	10	1.08548	0.86-1.38	0.497161
Anaerostipes	Inverse variance weighted	10	1.07729	0.90-1.29	0.420954
Anaerostipes	Simple mode	10	1.12222	0.79-1.59	0.530025
Anaerostipes	Weighted mode	10	1.09546	0.78-1.53	0.607788
Anaerotruncus	MR Egger	5	0.673433	0.16-2.91	0.633167
Anaerotruncus	Weighted median	5	0.986652	0.72-1.35	0.933042
Anaerotruncus	Inverse variance weighted	5	0.922994	0.72-1.18	0.515971
Anaerotruncus	Simple mode	5	1.04837	0.70-1.57	0.829001
Anaerotruncus	Weighted mode	5	1.0459	0.66-1.65	0.855801
Bacteroides	MR Egger	5	0.75242	0.13-4.21	0.767433
Bacteroides	Weighted median	5	0.79773	0.57-1.12	0.196957
Bacteroides	Inverse variance weighted	5	0.935222	0.70-1.24	0.643624
Bacteroides	Simple mode	5	0.756845	0.46-1.25	0.33605
Bacteroides	Weighted mode	5	0.759268	0.46-1.26	0.343521
Barnesiella	MR Egger	10	0.860353	0.50-1.48	0.599888
Barnesiella	Weighted median	10	1.01778	0.81-1.28	0.881618
Barnesiella	Inverse variance weighted	10	0.962475	0.82-1.14	0.649525
Barnesiella	Simple mode	10	1.02937	0.74-1.42	0.865094
Barnesiella	Weighted mode	10	1.03711	0.77-1.40	0.818415
Bifidobacterium	MR Egger	6	1.14807	0.77-1.71	0.534045
Bifidobacterium	Weighted median	6	1.0926	0.88-1.36	0.431491
Bifidobacterium	Inverse variance weighted	6	1.09516	0.92-1.30	0.308828
Bifidobacterium	Simple mode	6	1.11103	0.82-1.51	0.529055
Bifidobacterium	Weighted mode	6	1.12247	0.86-1.47	0.43466
Bilophila	MR Egger	6	0.598098	0.20-1.81	0.41356
Bilophila	Weighted median	6	1.09717	0.86-1.40	0.45652
Bilophila	Inverse variance weighted	6	1.09768	0.90-1.34	0.362065
Bilophila	Simple mode	6	1.15363	0.81-1.65	0.468704
Bilophila	Weighted mode	6	1.17949	0.82-1.70	0.417484
Butyricimonas	MR Egger	8	0.684678	0.30-1.57	0.407054
Butyricimonas	Weighted median	8	1.05077	0.85-1.29	0.639339
Butyricimonas	Inverse variance weighted	8	0.970529	0.76-1.24	0.808336
Butyricimonas	Simple mode	8	1.1269	0.83-1.53	0.467129
Butyricimonas	Weighted mode	8	1.1028	0.81-1.50	0.553661
Butyrivibrio	MR Egger	7	1.04031	0.52-2.09	0.915879
Butyrivibrio	Weighted median	7	1.13759	0.99-1.30	0.0626759
Butyrivibrio	Inverse variance weighted	7	1.0586	0.93-1.21	0.391425
Butyrivibrio	Simple mode	7	1.15412	0.97-1.37	0.153426
Butyrivibrio	Weighted mode	7	1.14965	0.96-1.38	0.184801
Candidatus Soleaferrea	MR Egger	4	1.29754	0.61-2.75	0.567478
Candidatus Soleaferrea	Weighted median	4	0.844575	0.68-1.05	0.122229
Candidatus Soleaferrea	Inverse variance weighted	4	0.885257	0.74-1.05	0.172201
Candidatus Soleaferrea	Simple mode	4	0.812962	0.60-1.11	0.282308
Candidatus Soleaferrea	Weighted mode	4	0.8113	0.60-1.10	0.267356
Catenibacterium	MR Egger	4	1.06774	0.23-4.96	0.940987
Catenibacterium	Weighted median	4	0.983419	0.85-1.13	0.817711
Catenibacterium	Inverse variance weighted	4	0.97269	0.86-1.10	0.653037
Catenibacterium	Simple mode	4	0.999791	0.82-1.21	0.998435
Catenibacterium	Weighted mode	4	0.999791	0.84-1.19	0.998282
Christensenellaceae R 7group	MR Egger	3	0.50738	0.12-2.10	0.521254
Christensenellaceae R 7group	Weighted median	3	0.82492	0.53-1.28	0.391731
Christensenellaceae R 7group	Inverse variance weighted	3	0.726337	0.49-1.07	0.103067
Christensenellaceae R 7group	Simple mode	3	0.859575	0.53-1.39	0.600137
Christensenellaceae R 7group	Weighted mode	3	0.859575	0.53-1.38	0.595988
Clostridium sensustricto1	MR Egger	6	0.722888	0.48-1.09	0.195364
Clostridium sensustricto1	Weighted median	6	0.894804	0.71-1.13	0.350364
Clostridium sensustricto1	Inverse variance weighted	6	0.99912	0.79-1.26	0.994063
Clostridium sensustricto1	Simple mode	6	0.874056	0.65-1.17	0.405116
Clostridium sensustricto1	Weighted mode	6	0.876455	0.69-1.12	0.339041
Collinsella	MR Egger	3	0.946008	0.02-36.90	0.981097
Collinsella	Weighted median	3	0.90666	0.62-1.32	0.611485
Collinsella	Inverse variance weighted	3	0.954481	0.71-1.28	0.756675
Collinsella	Simple mode	3	0.877408	0.57-1.35	0.61413
Collinsella	Weighted mode	3	0.865459	0.57-1.31	0.562821
Coprobacter	MR Egger	5	0.877713	0.59-1.31	0.56894
Coprobacter	Weighted median	5	0.917809	0.77-1.10	0.349051
Coprobacter	Inverse variance weighted	5	0.947719	0.82-1.10	0.46709
Coprobacter	Simple mode	5	0.920242	0.70-1.21	0.58057
Coprobacter	Weighted mode	5	0.876507	0.67-1.15	0.389665
Coprococcus1	MR Egger	7	0.702089	0.39-1.27	0.297523
Coprococcus1	Weighted median	7	0.982104	0.76-1.27	0.891409
Coprococcus1	Inverse variance weighted	7	0.972823	0.80-1.18	0.78244
Coprococcus1	Simple mode	7	1.15182	0.76-1.75	0.532952
Coprococcus1	Weighted mode	7	1.03048	0.68-1.56	0.892124
Coprococcus2	MR Egger	3	3.67773	0.23-60.1	0.52861
Coprococcus2	Weighted median	3	1.07667	0.77-1.5	0.662737
Coprococcus2	Inverse variance weighted	3	1.08676	0.84-1.41	0.525813
Coprococcus2	Simple mode	3	1.08438	0.74-1.58	0.716372
Coprococcus2	Weighted mode	3	1.05774	0.72-1.56	0.802088
Coprococcus3	MR Egger	5	1.05382	0.48-2.32	0.904754
Coprococcus3	Weighted median	5	1.0056	0.75-1.34	0.96973
Coprococcus3	Inverse variance weighted	5	0.989244	0.79-1.25	0.926662
Coprococcus3	Simple mode	5	1.02205	0.67-1.55	0.923128
Coprococcus3	Weighted mode	5	1.01813	0.68-1.53	0.935339
Defluviitaleaceae UCG011	MR Egger	8	1.15199	0.71-1.88	0.590399
Defluviitaleaceae UCG011	Weighted median	8	1.1415	0.95-1.38	0.164585
Defluviitaleaceae UCG011	Inverse variance weighted	8	1.02552	0.89-1.18	0.728273
Defluviitaleaceae UCG011	Simple mode	8	1.179	0.86-1.61	0.338665
Defluviitaleaceae UCG011	Weighted mode	8	1.17717	0.88-1.57	0.299694
Desulfovibrio	MR Egger	5	1.37981	0.43-4.42	0.625427
Desulfovibrio	Weighted median	5	1.01997	0.82-1.28	0.862389
Desulfovibrio	Inverse variance weighted	5	0.962697	0.79-1.18	0.708826
Desulfovibrio	Simple mode	5	1.03102	0.76-1.41	0.856796
Desulfovibrio	Weighted mode	5	1.03497	0.75-1.42	0.842245
Dorea	MR Egger	5	1.63861	0.64-4.22	0.381925
Dorea	Weighted median	5	1.49648	1.08-2.08	0.0157097
Dorea	Inverse variance weighted	5	1.45912	1.15-1.85	0.00191713
Dorea	Simple mode	5	1.5534	1.01-2.39	0.116038
Dorea	Weighted mode	5	1.5534	1.04-2.33	0.0990349
Eggerthella	MR Egger	5	1.33491	0.75-2.37	0.396321
Eggerthella	Weighted median	5	0.973788	0.82-1.16	0.763324
Eggerthella	Inverse variance weighted	5	1.02048	0.89-1.18	0.779841
Eggerthella	Simple mode	5	0.966564	0.77-1.22	0.785546
Eggerthella	Weighted mode	5	0.966564	0.77-1.21	0.778138
Eisenbergiella	MR Egger	5	1.33491	0.75-2.37	0.396321
Eisenbergiella	Weighted median	5	0.973788	0.81-1.17	0.771674
Eisenbergiella	Inverse variance weighted	5	1.02048	0.89-1.18	0.779841
Eisenbergiella	Simple mode	5	0.966564	0.77-1.22	0.788616
Eisenbergiella	Weighted mode	5	0.966564	0.77-1.21	0.78308
Enterorhabdus	MR Egger	3	0.960779	0.62-1.49	0.887844
Enterorhabdus	Weighted median	3	1.05678	0.85-1.31	0.610834
Enterorhabdus	Inverse variance weighted	3	1.08545	0.91-1.30	0.369223
Enterorhabdus	Simple mode	3	1.04726	0.83-1.33	0.740767
Enterorhabdus	Weighted mode	3	1.05074	0.82-1.35	0.734541
Erysipelatoclostridium	MR Egger	8	0.394773	0.17-0.90	0.0688525
Erysipelatoclostridium	Weighted median	8	0.868126	0.70-1.07	0.187731
Erysipelatoclostridium	Inverse variance weighted	8	0.895504	0.72-1.11	0.31171
Erysipelatoclostridium	Simple mode	8	0.852408	0.60-1.21	0.401353
Erysipelatoclostridium	Weighted mode	8	0.859751	0.63-1.18	0.378784
Escherichia Shigella	MR Egger	4	1.18262	0.61-2.28	0.666784
Escherichia Shigella	Weighted median	4	0.947287	0.71-1.26	0.70881
Escherichia Shigella	Inverse variance weighted	4	0.904405	0.71-1.15	0.404628
Escherichia Shigella	Simple mode	4	0.962775	0.64-1.45	0.867927
Escherichia Shigella	Weighted mode	4	0.956964	0.66-1.38	0.829602
Eubacterium brachy group	MR Egger	4	0.726684	0.43-1.24	0.361657
Eubacterium brachy group	Weighted median	4	1.0293	0.87-1.22	0.734164
Eubacterium brachy group	Inverse variance weighted	4	1.0068	0.88-1.16	0.924118
Eubacterium brachy group	Simple mode	4	1.04995	0.83-1.33	0.711105
Eubacterium brachy group	Weighted mode	4	1.04995	0.84-1.31	0.690903
Eubacterium coprostanoligenes group	MR Egger	6	1.58654	0.77-3.29	0.282362
Eubacterium coprostanoligenes group	Weighted median	6	0.868952	0.66-1.15	0.327855
Eubacterium coprostanoligenes group	Inverse variance weighted	6	0.904572	0.72-1.13	0.374676
Eubacterium coprostanoligenes group	Simple mode	6	0.848496	0.55-1.30	0.484393
Eubacterium coprostanoligenes group	Weighted mode	6	0.851062	0.55-1.33	0.507534
Eubacterium eligens group	MR Egger	3	0.904385	0.25-3.25	0.902761
Eubacterium eligens group	Weighted median	3	1.03748	0.73-1.47	0.834473
Eubacterium eligens group	Inverse variance weighted	3	1.01842	0.76-1.36	0.901177
Eubacterium eligens group	Simple mode	3	1.09492	0.70-1.71	0.727644
Eubacterium eligens group	Weighted mode	3	1.0856	0.69-1.70	0.753154
Eubacterium fissicatena group	MR Egger	5	0.904092	0.47-1.74	0.781878
Eubacterium fissicatena group	Weighted median	5	0.875997	0.75-1.02	0.0842552
Eubacterium fissicatena group	Inverse variance weighted	5	0.921132	0.82-1.04	0.178229
Eubacterium fissicatena group	Simple mode	5	0.869692	0.71-1.07	0.249249
Eubacterium fissicatena group	Weighted mode	5	0.869136	0.72-1.05	0.228861
Eubacterium hallii group	MR Egger	8	0.864157	0.61-1.22	0.439118
Eubacterium hallii group	Weighted median	8	1.10259	0.88-1.38	0.400361
Eubacterium hallii group	Inverse variance weighted	8	1.09148	0.92-1.30	0.319573
Eubacterium hallii group	Simple mode	8	1.20776	0.84-1.75	0.349283
Eubacterium hallii group	Weighted mode	8	1.15834	0.81-1.65	0.44172
Eubacterium nodatum group	MR Egger	3	1.21271	0.12-12.00	0.896052
Eubacterium nodatum group	Weighted median	3	0.911029	0.76-1.09	0.297368
Eubacterium nodatum group	Inverse variance weighted	3	0.907709	0.78-1.06	0.207378
Eubacterium nodatum group	Simple mode	3	0.929819	0.73-1.19	0.617543
Eubacterium nodatum group	Weighted mode	3	0.880708	0.70-1.10	0.384785
Eubacterium oxidoreducens group	MR Egger	4	1.13186	0.67-1.90	0.686717
Eubacterium oxidoreducens group	Weighted median	4	0.89465	0.72-1.11	0.313724
Eubacterium oxidoreducens group	Inverse variance weighted	4	0.839161	0.70-1.00	0.0499749
Eubacterium oxidoreducens group	Simple mode	4	0.908554	0.67-1.24	0.586609
Eubacterium oxidoreducens group	Weighted mode	4	0.911638	0.70-1.19	0.548911
Eubacterium rectale group	MR Egger	4	1.16975	0.18-7.80	0.886243
Eubacterium rectale group	Weighted median	4	0.770986	0.54-1.11	0.157932
Eubacterium rectale group	Inverse variance weighted	4	0.769146	0.55-1.07	0.123031
Eubacterium rectale group	Simple mode	4	0.6533	0.36-1.18	0.251237
Eubacterium rectale group	Weighted mode	4	0.702455	0.40-1.22	0.297879
Eubacterium ruminantium group	MR Egger	10	1.00491	0.67-1.51	0.981683
Eubacterium ruminantium group	Weighted median	10	0.98005	0.84-1.14	0.79685
Eubacterium ruminantium group	Inverse variance weighted	10	0.978332	0.87-1.10	0.713995
Eubacterium ruminantium group	Simple mode	10	0.978511	0.76-1.26	0.868598
Eubacterium ruminantium group	Weighted mode	10	0.987219	0.78-1.25	0.915884
Eubacterium ventriosum group	MR Egger	8	0.82125	0.41-1.66	0.601648
Eubacterium ventriosum group	Weighted median	8	1.19213	0.92-1.54	0.17984
Eubacterium ventriosum group	Inverse variance weighted	8	1.2312	1.01-1.50	0.0379087
Eubacterium ventriosum group	Simple mode	8	1.20122	0.82-1.77	0.381915
Eubacterium ventriosum group	Weighted mode	8	1.20122	0.86-1.69	0.325587
Eubacterium xylanophilum	MR Egger	7	0.945261	0.44-2.02	0.89041
Eubacterium xylanophilum	Weighted median	7	1.17708	0.92-1.50	0.188841
Eubacterium xylanophilum	Inverse variance weighted	7	1.08274	0.87-1.34	0.471563
Eubacterium xylanophilum	Simple mode	7	1.20084	0.87-1.67	0.315898
Eubacterium xylanophilum	Weighted mode	7	1.21445	0.90-1.64	0.248508
Faecalibacterium	MR Egger	3	0.875937	0.56-1.37	0.664209
Faecalibacterium	Weighted median	3	0.944867	0.73-1.23	0.671399
Faecalibacterium	Inverse variance weighted	3	0.963822	0.76-1.22	0.762936
Faecalibacterium	Simple mode	3	0.945902	0.68-1.32	0.775081
Faecalibacterium	Weighted mode	3	0.939154	0.70-1.26	0.717448
Family XIII AD3011 group	MR Egger	7	2.02773	0.84-4.91	0.177967
Family XIII AD3011 group	Weighted median	7	1.03045	0.80-1.33	0.820129
Family XIII AD3011 group	Inverse variance weighted	7	0.935614	0.77-1.14	0.51059
Family XIII AD3011 group	Simple mode	7	1.08697	0.73-1.62	0.694683
Family XIII AD3011 group	Weighted mode	7	1.06274	0.72-1.56	0.767629
Family XIII UCG001	MR Egger	5	0.944452	0.55-1.61	0.847578
Family XIII UCG001	Weighted median	5	1.00897	0.79-1.29	0.942319
Family XIII UCG001	Inverse variance weighted	5	1.04086	0.85-1.27	0.695509
Family XIII UCG001	Simple mode	5	1.00086	0.72-1.39	0.996179
Family XIII UCG001	Weighted mode	5	1.0056	0.75-1.36	0.972632
Flavonifractor	MR Egger	4	2.03208	0.52-7.94	0.415104
Flavonifractor	Weighted median	4	0.854112	0.66-1.11	0.233176
Flavonifractor	Inverse variance weighted	4	0.893951	0.68-1.17	0.421489
Flavonifractor	Simple mode	4	0.75036	0.48-1.17	0.291582
Flavonifractor	Weighted mode	4	0.75036	0.47-1.19	0.310901
Fusicatenibacter	MR Egger	9	1.32119	0.57-3.08	0.539738
Fusicatenibacter	Weighted median	9	1.05304	0.82-1.35	0.684282
Fusicatenibacter	Inverse variance weighted	9	1.15621	0.95-1.40	0.140489
Fusicatenibacter	Simple mode	9	1.0224	0.72-1.46	0.905703
Fusicatenibacter	Weighted mode	9	1.01811	0.71-1.45	0.923823
Gordonibacter	MR Egger	3	0.945348	0.39-2.28	0.920643
Gordonibacter	Weighted median	3	1.12466	0.94-1.35	0.20682
Gordonibacter	Inverse variance weighted	3	1.09189	0.94-1.26	0.236594
Gordonibacter	Simple mode	3	1.13397	0.91-1.41	0.371588
Gordonibacter	Weighted mode	3	1.1329	0.93-1.38	0.336538
Haemophilus	MR Egger	9	1.00031	0.76-1.31	0.998261
Haemophilus	Weighted median	9	1.03003	0.89-1.19	0.693533
Haemophilus	Inverse variance weighted	9	1.02102	0.91-1.15	0.72874
Haemophilus	Simple mode	9	1.00044	0.79-1.27	0.997212
Haemophilus	Weighted mode	9	1.04557	0.84-1.31	0.706929
Holdemanella	MR Egger	6	0.601924	0.36-1.02	0.129999
Holdemanella	Weighted median	6	0.902883	0.74-1.10	0.314746
Holdemanella	Inverse variance weighted	6	0.929742	0.78-1.11	0.413318
Holdemanella	Simple mode	6	0.875648	0.63-1.21	0.459216
Holdemanella	Weighted mode	6	0.87332	0.63-1.21	0.457634
Holdemania	MR Egger	6	1.65022	0.80-3.40	0.245259
Holdemania	Weighted median	6	0.98274	0.79-1.21	0.872208
Holdemania	Inverse variance weighted	6	1.06462	0.90-1.26	0.474348
Holdemania	Simple mode	6	0.966248	0.71-1.31	0.835727
Holdemania	Weighted mode	6	0.970961	0.72-1.30	0.851861
Howardella	MR Egger	7	0.811329	0.54-1.22	0.359227
Howardella	Weighted median	7	0.986561	0.87-1.12	0.83793
Howardella	Inverse variance weighted	7	0.980614	0.89-1.08	0.696073
Howardella	Simple mode	7	0.987135	0.83-1.17	0.888713
Howardella	Weighted mode	7	0.987135	0.83-1.18	0.89022
Intestinibacter	MR Egger	7	1.03763	0.58-1.87	0.907096
Intestinibacter	Weighted median	7	0.946813	0.76-1.18	0.624761
Intestinibacter	Inverse variance weighted	7	1.06039	0.90-1.25	0.494232
Intestinibacter	Simple mode	7	0.939098	0.69-1.28	0.703356
Intestinibacter	Weighted mode	7	0.936739	0.69-1.28	0.693405
Intestinimonas	MR Egger	11	0.860088	0.60-1.24	0.440526
Intestinimonas	Weighted median	11	0.907969	0.76-1.08	0.279628
Intestinimonas	Inverse variance weighted	11	0.939913	0.82-1.08	0.371819
Intestinimonas	Simple mode	11	0.901233	0.69-1.18	0.461783
Intestinimonas	Weighted mode	11	0.902449	0.70-1.16	0.442028
Lachnoclostridium	MR Egger	6	1.8871	0.60-5.98	0.341317
Lachnoclostridium	Weighted median	6	1.00505	0.75-1.34	0.972608
Lachnoclostridium	Inverse variance weighted	6	1.02671	0.82-1.29	0.820967
Lachnoclostridium	Simple mode	6	0.834018	0.51-1.36	0.502017
Lachnoclostridium	Weighted mode	6	0.831486	0.52-1.34	0.48261
Lachnospiraceae FCS020 group	MR Egger	7	0.893223	0.61-1.31	0.586255
Lachnospiraceae FCS020 group	Weighted median	7	0.972028	0.79-1.20	0.789344
Lachnospiraceae FCS020 group	Inverse variance weighted	7	1.02425	0.87-1.21	0.778652
Lachnospiraceae FCS020 group	Simple mode	7	0.983476	0.73-1.32	0.915889
Lachnospiraceae FCS020 group	Weighted mode	7	0.965924	0.74-1.25	0.802792
Lachnospiraceae NC2004 group	MR Egger	3	0.586814	0.10-3.40	0.658508
Lachnospiraceae NC2004 group	Weighted median	3	0.923622	0.72-1.18	0.520409
Lachnospiraceae NC2004 group	Inverse variance weighted	3	0.89915	0.74-1.09	0.271148
Lachnospiraceae NC2004 group	Simple mode	3	0.939047	0.73-1.21	0.675689
Lachnospiraceae NC2004 group	Weighted mode	3	0.940222	0.71-1.24	0.703324
Lachnospiraceae NK4A136	MR Egger	7	0.837326	0.63-1.11	0.276676
Lachnospiraceae NK4A136	Weighted median	7	0.807631	0.65-1.00	0.049033
Lachnospiraceae NK4A136	Inverse variance weighted	7	0.83625	0.71-0.98	0.0305399
Lachnospiraceae NK4A136	Simple mode	7	0.792703	0.61-1.03	0.133571
Lachnospiraceae NK4A136	Weighted mode	7	0.790182	0.63-0.99	0.0865957
Lachnospiraceae UCG001	MR Egger	7	0.99314	0.35-2.83	0.990221
Lachnospiraceae UCG001	Weighted median	7	0.973563	0.77-1.23	0.825229
Lachnospiraceae UCG001	Inverse variance weighted	7	1.0029	0.81-1.24	0.978481
Lachnospiraceae UCG001	Simple mode	7	0.841754	0.55-1.28	0.452865
Lachnospiraceae UCG001	Weighted mode	7	0.881611	0.59-1.31	0.55672
Lachnospiraceae UCG004	MR Egger	7	0.606494	0.14-2.71	0.541707
Lachnospiraceae UCG004	Weighted median	7	0.816759	0.62-1.08	0.159982
Lachnospiraceae UCG004	Inverse variance weighted	7	0.820065	0.65-1.03	0.087198
Lachnospiraceae UCG004	Simple mode	7	0.778394	0.48-1.27	0.356
Lachnospiraceae UCG004	Weighted mode	7	0.790372	0.50-1.24	0.347299
Lachnospiraceae UCG008	MR Egger	8	0.910848	0.35-2.36	0.853834
Lachnospiraceae UCG008	Weighted median	8	1.01972	0.87-1.19	0.803734
Lachnospiraceae UCG008	Inverse variance weighted	8	0.994776	0.88-1.12	0.932247
Lachnospiraceae UCG008	Simple mode	8	1.02616	0.81-1.29	0.833067
Lachnospiraceae UCG008	Weighted mode	8	1.02905	0.82-1.30	0.815382
Lachnospiraceae UCG010	MR Egger	5	0.677979	0.08-5.68	0.743847
Lachnospiraceae UCG010	Weighted median	5	1.05168	0.71-1.55	0.800261
Lachnospiraceae UCG010	Inverse variance weighted	5	1.00701	0.64-1.59	0.976143
Lachnospiraceae UCG010	Simple mode	5	1.27171	0.60-2.70	0.564702
Lachnospiraceae UCG010	Weighted mode	5	0.715641	0.32-1.63	0.468757
Lactobacillus	MR Egger	7	0.754157	0.42-1.35	0.385505
Lactobacillus	Weighted median	7	0.919986	0.76-1.11	0.390454
Lactobacillus	Inverse variance weighted	7	0.930713	0.80-1.08	0.352455
Lactobacillus	Simple mode	7	0.830814	0.60-1.15	0.308367
Lactobacillus	Weighted mode	7	0.820744	0.59-1.14	0.277468
Lactococcus	MR Egger	6	1.01482	0.52-1.98	0.967672
Lactococcus	Weighted median	6	0.9573	0.83-1.10	0.539338
Lactococcus	Inverse variance weighted	6	0.922895	0.82-1.03	0.167549
Lactococcus	Simple mode	6	0.971804	0.80-1.18	0.779804
Lactococcus	Weighted mode	6	0.973202	0.80-1.19	0.802657
Marvinbryantia	MR Egger	6	0.534117	0.23-1.22	0.210504
Marvinbryantia	Weighted median	6	0.974494	0.76-1.25	0.838883
Marvinbryantia	Inverse variance weighted	6	0.84765	0.68-1.06	0.139395
Marvinbryantia	Simple mode	6	0.982481	0.72-1.34	0.914666
Marvinbryantia	Weighted mode	6	0.982481	0.72-1.33	0.913891
Methanobrevibacter	MR Egger	3	0.881941	0.56-1.38	0.681671
Methanobrevibacter	Weighted median	3	1.02915	0.85-1.24	0.764746
Methanobrevibacter	Inverse variance weighted	3	0.986474	0.85-1.14	0.853001
Methanobrevibacter	Simple mode	3	1.04481	0.84-1.31	0.737077
Methanobrevibacter	Weighted mode	3	1.04424	0.84-1.29	0.727602
Odoribacter	MR Egger	3	2.35658	0.83-6.70	0.354241
Odoribacter	Weighted median	3	1.25816	0.83-1.90	0.273769
Odoribacter	Inverse variance weighted	3	1.329	0.93-1.90	0.12019
Odoribacter	Simple mode	3	1.15028	0.66-2.01	0.671957
Odoribacter	Weighted mode	3	1.1773	0.69-2.01	0.61152
Olsenella	MR Egger	7	0.941079	0.66-1.33	0.746699
Olsenella	Weighted median	7	1.0148	0.89-1.16	0.828335
Olsenella	Inverse variance weighted	7	1.02095	0.92-1.13	0.684232
Olsenella	Simple mode	7	0.925706	0.75-1.14	0.502891
Olsenella	Weighted mode	7	0.925706	0.75-1.15	0.505771
Oscillibacter	MR Egger	12	0.797664	0.50-1.28	0.370639
Oscillibacter	Weighted median	12	0.990892	0.85-1.16	0.907857
Oscillibacter	Inverse variance weighted	12	0.985505	0.88-1.11	0.804512
Oscillibacter	Simple mode	12	0.878902	0.67-1.15	0.373856
Oscillibacter	Weighted mode	12	1.07728	0.83-1.40	0.58668
Oscillospira	MR Egger	3	1.01831	0.13-8.09	0.98908
Oscillospira	Weighted median	3	0.9531	0.69-1.32	0.772714
Oscillospira	Inverse variance weighted	3	1.04881	0.78-1.41	0.754832
Oscillospira	Simple mode	3	0.920836	0.61-1.38	0.729158
Oscillospira	Weighted mode	3	0.914335	0.61-1.37	0.70764
Oxalobacter	MR Egger	8	1.35018	0.83-2.20	0.2753
Oxalobacter	Weighted median	8	1.09846	0.97-1.25	0.152889
Oxalobacter	Inverse variance weighted	8	1.07119	0.97-1.19	0.188173
Oxalobacter	Simple mode	8	1.13405	0.93-1.38	0.250768
Oxalobacter	Weighted mode	8	1.12402	0.94-1.35	0.252369
Parabacteroides	MR Egger	3	0.838419	0.10-6.75	0.895538
Parabacteroides	Weighted median	3	0.705411	0.47-1.06	0.0894716
Parabacteroides	Inverse variance weighted	3	0.696922	0.51-0.96	0.0248347
Parabacteroides	Simple mode	3	0.717658	0.46-1.11	0.27705
Parabacteroides	Weighted mode	3	0.723505	0.46-1.13	0.292329
Paraprevotella	MR Egger	9	0.836477	0.54-1.30	0.453232
Paraprevotella	Weighted median	9	1.01421	0.87-1.19	0.8615
Paraprevotella	Inverse variance weighted	9	1.03388	0.91-1.18	0.621781
Paraprevotella	Simple mode	9	1.02301	0.78-1.34	0.874517
Paraprevotella	Weighted mode	9	1.01539	0.79-1.31	0.909544
Parasutterella	MR Egger	11	1.31519	0.73-2.37	0.384533
Parasutterella	Weighted median	11	1.13788	0.94-1.37	0.180384
Parasutterella	Inverse variance weighted	11	1.09922	0.96-1.26	0.166919
Parasutterella	Simple mode	11	1.31556	0.94-1.84	0.141181
Parasutterella	Weighted mode	11	1.2483	0.91-1.72	0.204154
Peptococcus	MR Egger	8	1.15585	0.77-1.73	0.505466
Peptococcus	Weighted median	8	1.06122	0.92-1.22	0.401428
Peptococcus	Inverse variance weighted	8	1.06254	0.95-1.19	0.280979
Peptococcus	Simple mode	8	1.05491	0.85-1.31	0.638494
Peptococcus	Weighted mode	8	1.06123	0.87-1.29	0.573073
Phascolarctobacterium	MR Egger	6	0.99872	0.43-2.33	0.997783
Phascolarctobacterium	Weighted median	6	1.03762	0.83-1.30	0.747713
Phascolarctobacterium	Inverse variance weighted	6	1.05921	0.88-1.27	0.538013
Phascolarctobacterium	Simple mode	6	1.0358	0.76-1.42	0.835514
Phascolarctobacterium	Weighted mode	6	1.03405	0.76-1.42	0.842796
Prevotella7	MR Egger	5	0.429458	0.14-1.30	0.231895
Prevotella7	Weighted median	5	1.11794	0.96-1.30	0.156859
Prevotella7	Inverse variance weighted	5	1.10331	0.98-1.24	0.0966797
Prevotella7	Simple mode	5	1.16806	0.95-1.44	0.224092
Prevotella7	Weighted mode	5	1.16806	0.92-1.48	0.269852
Prevotella9	MR Egger	6	1.05269	0.60-1.86	0.868442
Prevotella9	Weighted median	6	0.92401	0.74-1.16	0.492663
Prevotella9	Inverse variance weighted	6	0.971468	0.80-1.18	0.766135
Prevotella9	Simple mode	6	0.986751	0.69-1.40	0.94382
Prevotella9	Weighted mode	6	0.905785	0.68-1.22	0.538485
Rikenellaceae RC9 gut group	MR Egger	6	1.1114	0.48-2.56	0.815925
Rikenellaceae RC9 gut group	Weighted median	6	1.03828	0.89-1.21	0.624639
Rikenellaceae RC9 gut group	Inverse variance weighted	6	1.01484	0.89-1.15	0.818955
Rikenellaceae RC9 gut group	Simple mode	6	1.06192	0.83-1.37	0.658821
Rikenellaceae RC9 gut group	Weighted mode	6	1.07827	0.84-1.38	0.577371
Romboutsia	MR Egger	3	0.396123	0.07-2.13	0.476106
Romboutsia	Weighted median	3	1.09865	0.78-1.54	0.587382
Romboutsia	Inverse variance weighted	3	1.1943	0.89-1.60	0.23086
Romboutsia	Simple mode	3	1.07898	0.68-1.72	0.780845
Romboutsia	Weighted mode	3	1.06061	0.75-1.50	0.772804
Roseburia	MR Egger	6	0.433419	0.17-1.10	0.151843
Roseburia	Weighted median	6	1.12621	0.83-1.53	0.443338
Roseburia	Inverse variance weighted	6	1.07902	0.84-1.38	0.545145
Roseburia	Simple mode	6	1.25127	0.74-2.12	0.442174
Roseburia	Weighted mode	6	1.23254	0.76-1.99	0.433052
Ruminiclostridium5	MR Egger	6	1.24705	0.48-3.25	0.675107
Ruminiclostridium5	Weighted median	6	0.952981	0.71-1.29	0.754093
Ruminiclostridium5	Inverse variance weighted	6	1.00581	0.79-1.28	0.961924
Ruminiclostridium5	Simple mode	6	0.863863	0.55-1.36	0.557162
Ruminiclostridium5	Weighted mode	6	0.878673	0.57-1.35	0.583459
Ruminiclostridium6	MR Egger	9	1.46072	0.83-2.58	0.233484
Ruminiclostridium6	Weighted median	9	1.01369	0.81-1.27	0.905348
Ruminiclostridium6	Inverse variance weighted	9	1.01954	0.82-1.27	0.863361
Ruminiclostridium6	Simple mode	9	1.02601	0.74-1.43	0.882598
Ruminiclostridium6	Weighted mode	9	1.05185	0.80-1.39	0.729115
Ruminiclostridium9	MR Egger	5	0.83772	0.25-2.81	0.793029
Ruminiclostridium9	Weighted median	5	1.2319	0.87-1.74	0.236359
Ruminiclostridium9	Inverse variance weighted	5	1.13022	0.89-1.44	0.325192
Ruminiclostridium9	Simple mode	5	1.36726	0.80-2.34	0.317173
Ruminiclostridium9	Weighted mode	5	1.37137	0.87-2.16	0.243338
Ruminococcaceae NK4A214 group	MR Egger	9	1.61744	0.89-2.94	0.158511
Ruminococcaceae NK4A214 group	Weighted median	9	0.965657	0.76-1.22	0.770015
Ruminococcaceae NK4A214 group	Inverse variance weighted	9	1.04724	0.87-1.26	0.629349
Ruminococcaceae NK4A214 group	Simple mode	9	0.944943	0.62-1.44	0.798179
Ruminococcaceae NK4A214 group	Weighted mode	9	0.948187	0.62-1.46	0.814717
Ruminococcaceae UCG002	MR Egger	10	0.682772	0.42-1.10	0.154928
Ruminococcaceae UCG002	Weighted median	10	1.09418	0.88-1.37	0.426774
Ruminococcaceae UCG002	Inverse variance weighted	10	1.03341	0.88-1.22	0.695437
Ruminococcaceae UCG002	Simple mode	10	1.16552	0.84-1.62	0.387679
Ruminococcaceae UCG002	Weighted mode	10	1.15551	0.79-1.69	0.47604
Ruminococcaceae UCG003	MR Egger	10	0.876387	0.53-1.46	0.626029
Ruminococcaceae UCG003	Weighted median	10	0.983299	0.80-1.21	0.873517
Ruminococcaceae UCG003	Inverse variance weighted	10	1.02588	0.88-1.20	0.743135
Ruminococcaceae UCG003	Simple mode	10	0.928891	0.67-1.29	0.669251
Ruminococcaceae UCG003	Weighted mode	10	0.945262	0.70-1.28	0.721066
Ruminococcaceae UCG004	MR Egger	3	0.996992	0.24-4.21	0.997393
Ruminococcaceae UCG004	Weighted median	3	1.07668	0.81-1.43	0.610549
Ruminococcaceae UCG004	Inverse variance weighted	3	1.08973	0.86-1.37	0.468575
Ruminococcaceae UCG004	Simple mode	3	1.12473	0.79-1.60	0.580167
Ruminococcaceae UCG004	Weighted mode	3	1.05819	0.75-1.49	0.778442
Ruminococcaceae UCG005	MR Egger	9	0.974264	0.63-1.51	0.910499
Ruminococcaceae UCG005	Weighted median	9	0.912451	0.73-1.14	0.412226
Ruminococcaceae UCG005	Inverse variance weighted	9	0.946762	0.81-1.11	0.508344
Ruminococcaceae UCG005	Simple mode	9	0.939919	0.69-1.28	0.703525
Ruminococcaceae UCG005	Weighted mode	9	0.932205	0.70-1.24	0.643062
Ruminococcaceae UCG009	MR Egger	6	0.767454	0.21-2.80	0.708879
Ruminococcaceae UCG009	Weighted median	6	0.762271	0.62-0.94	0.0109077
Ruminococcaceae UCG009	Inverse variance weighted	6	0.82961	0.70-0.99	0.0357257
Ruminococcaceae UCG009	Simple mode	6	0.718363	0.53-0.98	0.0931518
Ruminococcaceae UCG009	Weighted mode	6	0.719628	0.52-0.99	0.101154
Ruminococcaceae UCG010	MR Egger	4	26.1555	0.33-2048	0.280013
Ruminococcaceae UCG010	Weighted median	4	0.964067	0.71-1.31	0.817141
Ruminococcaceae UCG010	Inverse variance weighted	4	0.964336	0.76-1.23	0.769734
Ruminococcaceae UCG010	Simple mode	4	0.953975	0.62-1.46	0.841731
Ruminococcaceae UCG010	Weighted mode	4	0.956974	0.62-1.47	0.854578
Ruminococcaceae UCG011	MR Egger	6	1.05704	0.56-2.00	0.872431
Ruminococcaceae UCG011	Weighted median	6	1.0314	0.91-1.17	0.641951
Ruminococcaceae UCG011	Inverse variance weighted	6	1.02201	0.91-1.14	0.702616
Ruminococcaceae UCG011	Simple mode	6	1.07565	0.87-1.33	0.524592
Ruminococcaceae UCG011	Weighted mode	6	1.04499	0.86-1.26	0.670414
Ruminococcaceae UCG013	MR Egger	7	1.2157	0.54-2.72	0.654831
Ruminococcaceae UCG013	Weighted median	7	0.953466	0.74-1.23	0.714267
Ruminococcaceae UCG013	Inverse variance weighted	7	1.01919	0.77-1.34	0.892909
Ruminococcaceae UCG013	Simple mode	7	0.806342	0.55-1.18	0.307092
Ruminococcaceae UCG013	Weighted mode	7	0.902332	0.66-1.24	0.548079
Ruminococcaceae UCG014	MR Egger	6	0.651214	0.36-1.18	0.229908
Ruminococcaceae UCG014	Weighted median	6	0.926663	0.69-1.24	0.605364
Ruminococcaceae UCG014	Inverse variance weighted	6	0.940411	0.73-1.22	0.643056
Ruminococcaceae UCG014	Simple mode	6	1.14017	0.67-1.93	0.645789
Ruminococcaceae UCG014	Weighted mode	6	0.837835	0.53-1.33	0.485056
Ruminococcus gauvreauii group	MR Egger	7	0.972561	0.33-2.88	0.961883
Ruminococcus gauvreauii group	Weighted median	7	1.06256	0.82-1.37	0.642547
Ruminococcus gauvreauii group	Inverse variance weighted	7	0.974552	0.80-1.18	0.795377
Ruminococcus gauvreauii group	Simple mode	7	1.12252	0.76-1.66	0.581429
Ruminococcus gauvreauii group	Weighted mode	7	1.10153	0.79-1.53	0.587364
Ruminococcus gnavus group	MR Egger	7	1.43014	0.81-2.54	0.276291
Ruminococcus gnavus group	Weighted median	7	1.03997	0.88-1.23	0.645717
Ruminococcus gnavus group	Inverse variance weighted	7	1.06101	0.94-1.20	0.356802
Ruminococcus gnavus group	Simple mode	7	1.06947	0.85-1.35	0.595255
Ruminococcus gnavus group	Weighted mode	7	1.06743	0.86-1.33	0.584675
Ruminococcus torques group	MR Egger	5	1.08178	0.53-2.19	0.841386
Ruminococcus torques group	Weighted median	5	0.800396	0.60-1.07	0.128342
Ruminococcus torques group	Inverse variance weighted	5	0.863863	0.68-1.10	0.239569
Ruminococcus torques group	Simple mode	5	0.783416	0.53-1.16	0.29189
Ruminococcus torques group	Weighted mode	5	0.784649	0.53-1.15	0.283889
Ruminococcus1	MR Egger	5	1.17214	0.14-9.61	0.891779
Ruminococcus1	Weighted median	5	1.23392	0.83-1.83	0.293143
Ruminococcus1	Inverse variance weighted	5	1.05898	0.70-1.60	0.784078
Ruminococcus1	Simple mode	5	1.35682	0.74-2.49	0.379106
Ruminococcus1	Weighted mode	5	1.35682	0.81-2.26	0.30795
Ruminococcus2	MR Egger	7	1.25844	0.82-1.93	0.338263
Ruminococcus2	Weighted median	7	1.05485	0.83-1.34	0.663062
Ruminococcus2	Inverse variance weighted	7	1.13509	0.94-1.37	0.189254
Ruminococcus2	Simple mode	7	1.02368	0.70-1.50	0.907783
Ruminococcus2	Weighted mode	7	1.01209	0.69-1.49	0.953576
Sellimonas	MR Egger	6	0.813001	0.48-1.38	0.483101
Sellimonas	Weighted median	6	0.919801	0.81-1.05	0.211854
Sellimonas	Inverse variance weighted	6	0.94304	0.85-1.04	0.260608
Sellimonas	Simple mode	6	0.908722	0.75-1.09	0.358116
Sellimonas	Weighted mode	6	0.919274	0.78-1.09	0.366274
Slackia	MR Egger	4	0.392038	0.10-1.53	0.309777
Slackia	Weighted median	4	1.00872	0.83-1.22	0.929363
Slackia	Inverse variance weighted	4	0.952866	0.81-1.12	0.550702
Slackia	Simple mode	4	1.01371	0.78-1.31	0.924054
Slackia	Weighted mode	4	1.01497	0.79-1.31	0.916032
Streptococcus	MR Egger	11	1.19755	0.67-2.13	0.554726
Streptococcus	Weighted median	11	0.913276	0.73-1.14	0.428223
Streptococcus	Inverse variance weighted	11	1.01297	0.86-1.19	0.877201
Streptococcus	Simple mode	11	0.840063	0.57-1.23	0.390998
Streptococcus	Weighted mode	11	0.834684	0.55-1.26	0.407166
Subdoligranulum	MR Egger	7	0.663095	0.38-1.17	0.215628
Subdoligranulum	Weighted median	7	0.826553	0.63-1.08	0.169847
Subdoligranulum	Inverse variance weighted	7	0.989414	0.78-1.25	0.928584
Subdoligranulum	Simple mode	7	0.798677	0.50-1.27	0.382331
Subdoligranulum	Weighted mode	7	0.792296	0.53-1.18	0.299383
Sutterella	MR Egger	4	0.696915	0.24-1.98	0.568539
Sutterella	Weighted median	4	0.946099	0.70-1.28	0.722025
Sutterella	Inverse variance weighted	4	1.06623	0.80-1.42	0.663219
Sutterella	Simple mode	4	0.929556	0.62-1.40	0.749979
Sutterella	Weighted mode	4	0.927812	0.64-1.34	0.71424
Turicibacter	MR Egger	6	1.43888	0.50-4.10	0.533651
Turicibacter	Weighted median	6	1.09922	0.89-1.36	0.382107
Turicibacter	Inverse variance weighted	6	1.0833	0.92-1.28	0.350456
Turicibacter	Simple mode	6	1.14278	0.81-1.62	0.485307
Turicibacter	Weighted mode	6	1.15752	0.81-1.65	0.452555
Tyzzerella3	MR Egger	9	0.925235	0.47-1.82	0.828599
Tyzzerella3	Weighted median	9	0.866201	0.75-1.00	0.0498872
Tyzzerella3	Inverse variance weighted	9	0.909709	0.82-1.01	0.0883388
Tyzzerella3	Simple mode	9	0.849975	0.67-1.08	0.220361
Tyzzerella3	Weighted mode	9	0.853519	0.69-1.06	0.193303
Veillonella	MR Egger	4	0.145095	0.00-14.1	0.495523
Veillonella	Weighted median	4	1.0417	0.81-1.35	0.754401
Veillonella	Inverse variance weighted	4	0.95725	0.78-1.17	0.674986
Veillonella	Simple mode	4	1.05012	0.75-1.46	0.790623
Veillonella	Weighted mode	4	1.04895	0.71-1.54	0.823915
Victivallis	MR Egger	5	1.29497	0.56-3.02	0.591906
Victivallis	Weighted median	5	0.894737	0.77-1.04	0.145783
Victivallis	Inverse variance weighted	5	0.937951	0.83-1.06	0.295276
Victivallis	Simple mode	5	0.884883	0.72-1.09	0.314438
Victivallis	Weighted mode	5	0.881879	0.71-1.09	0.314036
