# Supplementary material for: Association of gut microbiota with age-related macular degeneration and glaucoma: a bidirectional Mendelian randomization study
Source: Preprints.org preprint supplement (doi:10.20944/preprints202310.0525.v1), 2023-10-09
Supplement: Supplementary file 5 [file S4 MR estimates of bacteria on glaucoma.xlsx]

## Sheet: Sheet1
Table S4. MR estimates of bacteria on glaucoma.
Bacterial taxa (Exposures)		glaucome (outcome)
	Methods	SNP	OR	95% CI	P
Adlercreutzia	MR Egger	4	1.30325	0.63-2.69	0.548227
Adlercreutzia	Weighted median	4	1.10833	0.94-1.31	0.229093
Adlercreutzia	Inverse variance weighted	4	1.11744	0.96-1.31	0.164182
Adlercreutzia	Simple mode	4	1.23259	0.93-1.63	0.241989
Adlercreutzia	Weighted mode	4	1.02319	0.79-1.32	0.872637
Akkermansia	MR Egger	8	1.01698	0.72-1.44	0.927724
Akkermansia	Weighted median	8	0.918597	0.79-1.06	0.257552
Akkermansia	Inverse variance weighted	8	0.926327	0.83-1.03	0.171904
Akkermansia	Simple mode	8	0.915595	0.74-1.14	0.453264
Akkermansia	Weighted mode	8	0.917613	0.75-1.13	0.439094
Alistipes	MR Egger	5	2.45086	0.53-11.4	0.3358
Alistipes	Weighted median	5	0.985128	0.79-1.23	0.894845
Alistipes	Inverse variance weighted	5	1.02764	0.85-1.24	0.775396
Alistipes	Simple mode	5	0.98396	0.73-1.32	0.919666
Alistipes	Weighted mode	5	0.982834	0.75-1.29	0.907773
Allisonella	MR Egger	4	1.2261	0.69-2.18	0.557945
Allisonella	Weighted median	4	0.994238	0.90-1.09	0.906467
Allisonella	Inverse variance weighted	4	0.974397	0.90-1.06	0.534411
Allisonella	Simple mode	4	1.00083	0.87-1.15	0.991592
Allisonella	Weighted mode	4	1.00363	0.88-1.14	0.959314
Anaerofilum	MR Egger	6	0.904191	0.58-1.41	0.681162
Anaerofilum	Weighted median	6	0.974193	0.88-1.08	0.625997
Anaerofilum	Inverse variance weighted	6	0.978582	0.90-1.07	0.62214
Anaerofilum	Simple mode	6	0.967974	0.83-1.13	0.69706
Anaerofilum	Weighted mode	6	0.971264	0.83-1.13	0.724474
Anaerostipes	MR Egger	9	1.77791	1.05-3.02	0.0706815
Anaerostipes	Weighted median	9	0.908751	0.76-1.09	0.295681
Anaerostipes	Inverse variance weighted	9	0.955167	0.81-1.13	0.588296
Anaerostipes	Simple mode	9	0.881942	0.67-1.16	0.390125
Anaerostipes	Weighted mode	9	0.886259	0.68-1.16	0.40424
Anaerotruncus	MR Egger	5	1.62668	0.18-14.8	0.695032
Anaerotruncus	Weighted median	5	1.03858	0.80-1.35	0.777904
Anaerotruncus	Inverse variance weighted	5	1.1431	0.83-1.57	0.40888
Anaerotruncus	Simple mode	5	0.967466	0.66-1.42	0.87365
Anaerotruncus	Weighted mode	5	0.955234	0.68-1.34	0.803413
Bacteroides	MR Egger	5	0.833454	0.24-2.93	0.794755
Bacteroides	Weighted median	5	1.11877	0.88-1.43	0.369568
Bacteroides	Inverse variance weighted	5	0.996997	0.81-1.23	0.977218
Bacteroides	Simple mode	5	1.17703	0.81-1.71	0.443056
Bacteroides	Weighted mode	5	1.17472	0.83-1.67	0.419422
Barnesiella	MR Egger	10	0.850113	0.60-1.21	0.389922
Barnesiella	Weighted median	10	0.931698	0.80-1.08	0.353825
Barnesiella	Inverse variance weighted	10	0.938576	0.84-1.05	0.254589
Barnesiella	Simple mode	10	0.910288	0.73-1.14	0.435254
Barnesiella	Weighted mode	10	0.918974	0.74-1.14	0.45847
Bifidobacterium	MR Egger	6	1.10482	0.84-1.46	0.521222
Bifidobacterium	Weighted median	6	1.10285	0.95-1.28	0.195821
Bifidobacterium	Inverse variance weighted	6	1.08947	0.97-1.23	0.152958
Bifidobacterium	Simple mode	6	1.09703	0.89-1.35	0.421134
Bifidobacterium	Weighted mode	6	1.1047	0.94-1.30	0.291865
Bilophila	MR Egger	6	1.25002	0.59-2.66	0.592619
Bilophila	Weighted median	6	1.03542	0.87-1.24	0.70048
Bilophila	Inverse variance weighted	6	1.0019	0.87-1.15	0.978903
Bilophila	Simple mode	6	1.11617	0.85-1.47	0.465836
Bilophila	Weighted mode	6	1.10736	0.84-1.46	0.506616
Butyricimonas	MR Egger	8	1.15409	0.79-1.68	0.48368
Butyricimonas	Weighted median	8	0.955664	0.82-1.11	0.557036
Butyricimonas	Inverse variance weighted	8	0.909175	0.81-1.02	0.107027
Butyricimonas	Simple mode	8	0.957088	0.77-1.19	0.707418
Butyricimonas	Weighted mode	8	0.957088	0.77-1.18	0.696049
Butyrivibrio	MR Egger	7	1.08509	0.71-1.67	0.725487
Butyrivibrio	Weighted median	7	1.06353	0.97-1.17	0.205512
Butyrivibrio	Inverse variance weighted	7	1.05685	0.97-1.15	0.21278
Butyrivibrio	Simple mode	7	1.09187	0.92-1.29	0.345106
Butyrivibrio	Weighted mode	7	1.02339	0.87-1.21	0.793332
Candidatus Soleaferrea	MR Egger	4	1.49546	0.96-2.34	0.220063
Candidatus Soleaferrea	Weighted median	4	1.03185	0.89-1.20	0.675915
Candidatus Soleaferrea	Inverse variance weighted	4	1.057	0.94-1.19	0.366483
Candidatus Soleaferrea	Simple mode	4	1.02143	0.83-1.26	0.855141
Candidatus Soleaferrea	Weighted mode	4	1.02259	0.84-1.24	0.836339
Catenibacterium	MR Egger	4	2.81644	0.95-8.33	0.202224
Catenibacterium	Weighted median	4	1.01875	0.91-1.14	0.745121
Catenibacterium	Inverse variance weighted	4	1.01819	0.91-1.14	0.76228
Catenibacterium	Simple mode	4	1.08496	0.89-1.32	0.471826
Catenibacterium	Weighted mode	4	1.0741	0.89-1.30	0.519664
Christensenellaceae R 7group	MR Egger	3	0.629273	0.31-1.28	0.421586
Christensenellaceae R 7group	Weighted median	3	0.774723	0.58-1.04	0.0884569
Christensenellaceae R 7group	Inverse variance weighted	3	0.789671	0.62-1.00	0.0508361
Christensenellaceae R 7group	Simple mode	3	0.741013	0.53-1.04	0.223494
Christensenellaceae R 7group	Weighted mode	3	0.744487	0.52-1.06	0.245883
Clostridium sensustricto1	MR Egger	6	1.08511	0.67-1.76	0.757043
Clostridium sensustricto1	Weighted median	6	0.9535	0.81-1.12	0.563845
Clostridium sensustricto1	Inverse variance weighted	6	0.896367	0.72-1.12	0.339801
Clostridium sensustricto1	Simple mode	6	0.93835	0.76-1.16	0.584412
Clostridium sensustricto1	Weighted mode	6	0.961478	0.81-1.14	0.676055
Collinsella	MR Egger	3	0.503144	0.03-9.26	0.724341
Collinsella	Weighted median	3	1.08354	0.83-1.42	0.562757
Collinsella	Inverse variance weighted	3	1.0055	0.82-1.24	0.958839
Collinsella	Simple mode	3	1.11004	0.80-1.53	0.59136
Collinsella	Weighted mode	3	1.10594	0.80-1.54	0.609645
Coprobacter	MR Egger	5	0.982476	0.67-1.45	0.934519
Coprobacter	Weighted median	5	0.946988	0.83-1.08	0.425294
Coprobacter	Inverse variance weighted	5	0.941201	0.83-1.07	0.348928
Coprobacter	Simple mode	5	0.943777	0.76-1.17	0.624994
Coprobacter	Weighted mode	5	0.991284	0.84-1.17	0.924002
Coprococcus1	MR Egger	7	1.24559	0.67-2.31	0.515759
Coprococcus1	Weighted median	7	1.05068	0.85-1.30	0.648812
Coprococcus1	Inverse variance weighted	7	1.00049	0.82-1.22	0.99609
Coprococcus1	Simple mode	7	1.19118	0.78-1.82	0.446656
Coprococcus1	Weighted mode	7	1.21377	0.83-1.77	0.35369
Coprococcus2	MR Egger	3	2.91896	0.12-73.90	0.633203
Coprococcus2	Weighted median	3	0.923902	0.71-1.20	0.550556
Coprococcus2	Inverse variance weighted	3	0.96432	0.75-1.24	0.779957
Coprococcus2	Simple mode	3	0.885297	0.64-1.22	0.533221
Coprococcus2	Weighted mode	3	0.887827	0.64-1.23	0.545656
Coprococcus3	MR Egger	5	1.46314	0.77-2.77	0.326771
Coprococcus3	Weighted median	5	0.841881	0.68-1.04	0.117439
Coprococcus3	Inverse variance weighted	5	0.927879	0.73-1.17	0.532716
Coprococcus3	Simple mode	5	0.751008	0.52-1.08	0.192726
Coprococcus3	Weighted mode	5	0.75238	0.50-1.14	0.252377
Defluviitaleaceae UCG011	MR Egger	8	0.792969	0.52-1.20	0.31723
Defluviitaleaceae UCG011	Weighted median	8	0.910805	0.80-1.04	0.176408
Defluviitaleaceae UCG011	Inverse variance weighted	8	0.945604	0.84-1.07	0.369375
Defluviitaleaceae UCG011	Simple mode	8	0.843771	0.67-1.06	0.195001
Defluviitaleaceae UCG011	Weighted mode	8	0.85317	0.67-1.08	0.231667
Desulfovibrio	MR Egger	5	0.901584	0.39-2.07	0.822271
Desulfovibrio	Weighted median	5	0.883838	0.76-1.03	0.11936
Desulfovibrio	Inverse variance weighted	5	0.907187	0.80-1.03	0.143044
Desulfovibrio	Simple mode	5	0.869402	0.69-1.09	0.29429
Desulfovibrio	Weighted mode	5	0.868585	0.71-1.06	0.243461
Dorea	MR Egger	5	1.06094	0.59-1.90	0.855602
Dorea	Weighted median	5	1.01335	0.83-1.24	0.898868
Dorea	Inverse variance weighted	5	1.0089	0.85-1.20	0.919121
Dorea	Simple mode	5	1.02059	0.79-1.32	0.882642
Dorea	Weighted mode	5	1.01425	0.77-1.34	0.925649
Eggerthella	MR Egger	5	0.848673	0.48-1.52	0.617904
Eggerthella	Weighted median	5	1.03099	0.90-1.18	0.655098
Eggerthella	Inverse variance weighted	5	1.08589	0.94-1.25	0.263013
Eggerthella	Simple mode	5	1.00805	0.85-1.20	0.931038
Eggerthella	Weighted mode	5	0.997651	0.85-1.17	0.978815
Eisenbergiella	MR Egger	5	0.704607	0.23-2.17	0.585367
Eisenbergiella	Weighted median	5	0.976909	0.85-1.13	0.74971
Eisenbergiella	Inverse variance weighted	5	0.944637	0.84-1.06	0.338888
Eisenbergiella	Simple mode	5	0.986051	0.81-1.20	0.895227
Eisenbergiella	Weighted mode	5	0.9845	0.81-1.19	0.880533
Enterorhabdus	MR Egger	3	0.832477	0.60-1.15	0.466166
Enterorhabdus	Weighted median	3	0.898895	0.77-1.04	0.16247
Enterorhabdus	Inverse variance weighted	3	0.911806	0.80-1.04	0.163451
Enterorhabdus	Simple mode	3	0.886038	0.74-1.07	0.327417
Enterorhabdus	Weighted mode	3	0.890921	0.74-1.07	0.343773
Erysipelatoclostridium	MR Egger	8	1.37126	0.78-2.40	0.310013
Erysipelatoclostridium	Weighted median	8	0.914821	0.80-1.05	0.20964
Erysipelatoclostridium	Inverse variance weighted	8	0.908204	0.79-1.04	0.160538
Erysipelatoclostridium	Simple mode	8	0.893965	0.73-1.09	0.302247
Erysipelatoclostridium	Weighted mode	8	0.897885	0.73-1.10	0.328852
Escherichia Shigella	MR Egger	4	1.23937	0.64-2.39	0.587248
Escherichia Shigella	Weighted median	4	1.03171	0.84-1.26	0.762532
Escherichia Shigella	Inverse variance weighted	4	0.990454	0.79-1.24	0.933631
Escherichia Shigella	Simple mode	4	1.09946	0.82-1.47	0.57168
Escherichia Shigella	Weighted mode	4	1.06292	0.80-1.42	0.707951
Eubacterium brachy group	MR Egger	4	0.761977	0.53-1.10	0.283493
Eubacterium brachy group	Weighted median	4	1.03296	0.91-1.17	0.601172
Eubacterium brachy group	Inverse variance weighted	4	1.03916	0.93-1.17	0.512826
Eubacterium brachy group	Simple mode	4	1.0269	0.83-1.27	0.820527
Eubacterium brachy group	Weighted mode	4	1.01036	0.83-1.23	0.925972
Eubacterium coprostanoligenes group	MR Egger	6	1.31647	0.58-2.97	0.544449
Eubacterium coprostanoligenes group	Weighted median	6	1.1238	0.91-1.39	0.287146
Eubacterium coprostanoligenes group	Inverse variance weighted	6	1.10052	0.88-1.38	0.411219
Eubacterium coprostanoligenes group	Simple mode	6	1.21167	0.84-1.75	0.35314
Eubacterium coprostanoligenes group	Weighted mode	6	1.23882	0.90-1.71	0.250941
Eubacterium eligens group	MR Egger	3	2.06291	0.82-5.19	0.366875
Eubacterium eligens group	Weighted median	3	0.986585	0.75-1.29	0.922078
Eubacterium eligens group	Inverse variance weighted	3	1.06848	0.87-1.32	0.53864
Eubacterium eligens group	Simple mode	3	0.964151	0.72-1.30	0.831936
Eubacterium eligens group	Weighted mode	3	0.968041	0.70-1.34	0.864022
Eubacterium fissicatena group	MR Egger	5	0.822978	0.53-1.29	0.457699
Eubacterium fissicatena group	Weighted median	5	1.1087	0.99-1.24	0.0693231
Eubacterium fissicatena group	Inverse variance weighted	5	1.07002	0.98-1.16	0.110676
Eubacterium fissicatena group	Simple mode	5	1.12376	0.97-1.31	0.202296
Eubacterium fissicatena group	Weighted mode	5	1.12137	0.96-1.31	0.231266
Eubacterium hallii group	MR Egger	8	1.14575	0.86-1.53	0.395942
Eubacterium hallii group	Weighted median	8	1.0466	0.89-1.23	0.584883
Eubacterium hallii group	Inverse variance weighted	8	1.04725	0.90-1.21	0.539841
Eubacterium hallii group	Simple mode	8	1.05203	0.81-1.37	0.718955
Eubacterium hallii group	Weighted mode	8	1.05496	0.84-1.32	0.650984
Eubacterium nodatum group	MR Egger	3	3.37146	0.70-16.20	0.37105
Eubacterium nodatum group	Weighted median	3	1.16361	1.01-1.35	0.0414891
Eubacterium nodatum group	Inverse variance weighted	3	1.12787	0.95-1.34	0.173245
Eubacterium nodatum group	Simple mode	3	1.2084	1.01-1.45	0.181723
Eubacterium nodatum group	Weighted mode	3	1.2084	0.99-1.47	0.200488
Eubacterium oxidoreducens group	MR Egger	3	1.14446	0.73-1.80	0.663491
Eubacterium oxidoreducens group	Weighted median	3	1.02332	0.88-1.20	0.771364
Eubacterium oxidoreducens group	Inverse variance weighted	3	1.01724	0.90-1.15	0.786482
Eubacterium oxidoreducens group	Simple mode	3	1.01016	0.83-1.23	0.93011
Eubacterium oxidoreducens group	Weighted mode	3	1.05438	0.86-1.29	0.656221
Eubacterium rectale group	MR Egger	4	1.46577	0.59-3.66	0.499045
Eubacterium rectale group	Weighted median	4	1.14087	0.92-1.42	0.233821
Eubacterium rectale group	Inverse variance weighted	4	1.16148	0.95-1.41	0.135838
Eubacterium rectale group	Simple mode	4	1.11281	0.83-1.48	0.51919
Eubacterium rectale group	Weighted mode	4	1.11345	0.84-1.48	0.509927
Eubacterium ruminantium group	MR Egger	10	1.01699	0.76-1.36	0.911542
Eubacterium ruminantium group	Weighted median	10	0.998936	0.89-1.12	0.98521
Eubacterium ruminantium group	Inverse variance weighted	10	0.956179	0.88-1.04	0.287917
Eubacterium ruminantium group	Simple mode	10	1.01011	0.83-1.23	0.92199
Eubacterium ruminantium group	Weighted mode	10	1.01011	0.85-1.21	0.914428
Eubacterium ventriosum group	MR Egger	8	1.11387	0.68-1.82	0.681565
Eubacterium ventriosum group	Weighted median	8	0.995093	0.84-1.18	0.954587
Eubacterium ventriosum group	Inverse variance weighted	8	1.01119	0.89-1.15	0.86764
Eubacterium ventriosum group	Simple mode	8	0.976485	0.75-1.27	0.86341
Eubacterium ventriosum group	Weighted mode	8	0.974654	0.75-1.27	0.854831
Eubacterium xylanophilum	MR Egger	7	0.749699	0.45-1.25	0.318004
Eubacterium xylanophilum	Weighted median	7	1.07993	0.90-1.30	0.415633
Eubacterium xylanophilum	Inverse variance weighted	7	1.08182	0.90-1.29	0.388996
Eubacterium xylanophilum	Simple mode	7	1.08418	0.79-1.50	0.640021
Eubacterium xylanophilum	Weighted mode	7	1.08092	0.78-1.50	0.657297
Faecalibacterium	MR Egger	3	0.967018	0.54-1.72	0.927428
Faecalibacterium	Weighted median	3	0.903918	0.75-1.09	0.30136
Faecalibacterium	Inverse variance weighted	3	0.942421	0.76-1.17	0.595946
Faecalibacterium	Simple mode	3	0.846322	0.64-1.12	0.364706
Faecalibacterium	Weighted mode	3	0.863644	0.69-1.08	0.324378
Family XIII AD3011 group	MR Egger	7	1.0007	0.57-1.76	0.998142
Family XIII AD3011 group	Weighted median	7	0.939694	0.79-1.12	0.476495
Family XIII AD3011 group	Inverse variance weighted	7	0.983672	0.86-1.12	0.806362
Family XIII AD3011 group	Simple mode	7	0.914911	0.73-1.15	0.477623
Family XIII AD3011 group	Weighted mode	7	0.914911	0.71-1.18	0.516202
Family XIII UCG001	MR Egger	5	1.07804	0.73-1.59	0.728949
Family XIII UCG001	Weighted median	5	1.0366	0.86-1.25	0.703787
Family XIII UCG001	Inverse variance weighted	5	1.03689	0.90-1.20	0.621159
Family XIII UCG001	Simple mode	5	0.958728	0.74-1.23	0.759753
Family XIII UCG001	Weighted mode	5	1.03463	0.81-1.32	0.798664
Flavonifractor	MR Egger	4	1.23712	0.40-3.84	0.747881
Flavonifractor	Weighted median	4	1.04198	0.86-1.27	0.68297
Flavonifractor	Inverse variance weighted	4	1.00877	0.84-1.21	0.924856
Flavonifractor	Simple mode	4	1.12345	0.82-1.55	0.526205
Flavonifractor	Weighted mode	4	1.12345	0.83-1.52	0.508825
Fusicatenibacter	MR Egger	9	1.06152	0.58-1.94	0.851379
Fusicatenibacter	Weighted median	9	1.05551	0.89-1.25	0.526189
Fusicatenibacter	Inverse variance weighted	9	1.07169	0.94-1.22	0.301899
Fusicatenibacter	Simple mode	9	1.05667	0.82-1.36	0.683454
Fusicatenibacter	Weighted mode	9	1.05923	0.83-1.35	0.655275
Gordonibacter	MR Egger	3	2.12551	1.13-4.00	0.257645
Gordonibacter	Weighted median	3	1.06604	0.91-1.24	0.417792
Gordonibacter	Inverse variance weighted	3	1.04433	0.88-1.25	0.630145
Gordonibacter	Simple mode	3	1.11523	0.89-1.39	0.4341
Gordonibacter	Weighted mode	3	1.11104	0.89-1.39	0.458395
Haemophilus	MR Egger	9	1.08443	0.90-1.31	0.43471
Haemophilus	Weighted median	9	0.992872	0.89-1.11	0.897003
Haemophilus	Inverse variance weighted	9	0.975547	0.90-1.06	0.555667
Haemophilus	Simple mode	9	0.998545	0.86-1.16	0.985123
Haemophilus	Weighted mode	9	0.996819	0.86-1.16	0.967966
Holdemanella	MR Egger	6	1.09731	0.85-1.41	0.508026
Holdemanella	Weighted median	6	1.08923	0.96-1.24	0.196262
Holdemanella	Inverse variance weighted	6	1.09387	0.99-1.21	0.072565
Holdemanella	Simple mode	6	1.08404	0.90-1.31	0.43306
Holdemanella	Weighted mode	6	1.08958	0.93-1.28	0.339167
Holdemania	MR Egger	6	0.649106	0.33-1.29	0.28345
Holdemania	Weighted median	6	1.0593	0.92-1.22	0.428167
Holdemania	Inverse variance weighted	6	1.00837	0.85-1.19	0.921898
Holdemania	Simple mode	6	1.08838	0.91-1.30	0.389137
Holdemania	Weighted mode	6	1.08838	0.90-1.32	0.432952
Howardella	MR Egger	7	0.78516	0.58-1.06	0.169939
Howardella	Weighted median	7	1.00789	0.91-1.12	0.879733
Howardella	Inverse variance weighted	7	0.960538	0.89-1.03	0.281367
Howardella	Simple mode	7	1.02408	0.88-1.19	0.77232
Howardella	Weighted mode	7	1.02158	0.88-1.19	0.79088
Intestinibacter	MR Egger	7	0.814405	0.53-1.25	0.387307
Intestinibacter	Weighted median	7	0.904064	0.78-1.05	0.192441
Intestinibacter	Inverse variance weighted	7	0.892482	0.79-1.01	0.0690746
Intestinibacter	Simple mode	7	0.946606	0.74-1.21	0.675015
Intestinibacter	Weighted mode	7	0.941575	0.75-1.18	0.623504
Intestinimonas	MR Egger	11	0.953773	0.65-1.39	0.812668
Intestinimonas	Weighted median	11	0.977541	0.84-1.13	0.760643
Intestinimonas	Inverse variance weighted	11	0.915406	0.80-1.04	0.186801
Intestinimonas	Simple mode	11	1.03766	0.79-1.37	0.797603
Intestinimonas	Weighted mode	11	1.04315	0.83-1.31	0.723952
Lachnoclostridium	MR Egger	6	1.15231	0.46-2.91	0.779256
Lachnoclostridium	Weighted median	6	0.854319	0.68-1.07	0.170251
Lachnoclostridium	Inverse variance weighted	6	0.842114	0.70-1.01	0.0597342
Lachnoclostridium	Simple mode	6	0.859866	0.61-1.21	0.427565
Lachnoclostridium	Weighted mode	6	0.91832	0.65-1.31	0.656197
Lachnospiraceae FCS020 group	MR Egger	7	1.01711	0.79-1.31	0.899635
Lachnospiraceae FCS020 group	Weighted median	7	0.994774	0.85-1.17	0.948518
Lachnospiraceae FCS020 group	Inverse variance weighted	7	1.01166	0.90-1.14	0.844101
Lachnospiraceae FCS020 group	Simple mode	7	0.922854	0.71-1.19	0.563726
Lachnospiraceae FCS020 group	Weighted mode	7	1.09166	0.86-1.38	0.496663
Lachnospiraceae NC2004 group	MR Egger	3	0.201781	0.03-1.19	0.327663
Lachnospiraceae NC2004 group	Weighted median	3	1.24492	1.04-1.50	0.0193739
Lachnospiraceae NC2004 group	Inverse variance weighted	3	1.12344	0.84-1.50	0.426676
Lachnospiraceae NC2004 group	Simple mode	3	1.3052	1.03-1.65	0.158274
Lachnospiraceae NC2004 group	Weighted mode	3	1.3052	1.01-1.69	0.178538
Lachnospiraceae NK4A136	MR Egger	7	1.02089	0.75-1.39	0.900889
Lachnospiraceae NK4A136	Weighted median	7	1.02521	0.88-1.19	0.749419
Lachnospiraceae NK4A136	Inverse variance weighted	7	1.00205	0.86-1.17	0.979788
Lachnospiraceae NK4A136	Simple mode	7	1.09243	0.86-1.38	0.487384
Lachnospiraceae NK4A136	Weighted mode	7	1.01819	0.86-1.21	0.843141
Lachnospiraceae UCG001	MR Egger	7	0.726775	0.41-1.30	0.333584
Lachnospiraceae UCG001	Weighted median	7	1.02395	0.88-1.20	0.765635
Lachnospiraceae UCG001	Inverse variance weighted	7	1.01862	0.89-1.17	0.797044
Lachnospiraceae UCG001	Simple mode	7	0.906952	0.70-1.17	0.479302
Lachnospiraceae UCG001	Weighted mode	7	0.919438	0.70-1.20	0.561456
Lachnospiraceae UCG004	MR Egger	7	1.26467	0.52-3.07	0.625846
Lachnospiraceae UCG004	Weighted median	7	1.14185	0.94-1.38	0.176472
Lachnospiraceae UCG004	Inverse variance weighted	7	1.10791	0.95-1.29	0.180617
Lachnospiraceae UCG004	Simple mode	7	1.16404	0.86-1.58	0.362826
Lachnospiraceae UCG004	Weighted mode	7	1.15555	0.82-1.62	0.433447
Lachnospiraceae UCG008	MR Egger	8	0.535014	0.27-1.08	0.130519
Lachnospiraceae UCG008	Weighted median	8	0.920824	0.82-1.03	0.145683
Lachnospiraceae UCG008	Inverse variance weighted	8	0.948986	0.87-1.04	0.243809
Lachnospiraceae UCG008	Simple mode	8	0.897156	0.74-1.09	0.301842
Lachnospiraceae UCG008	Weighted mode	8	0.897156	0.75-1.07	0.271218
Lachnospiraceae UCG010	MR Egger	5	1.29747	0.70-2.42	0.472107
Lachnospiraceae UCG010	Weighted median	5	0.931628	0.78-1.11	0.4367
Lachnospiraceae UCG010	Inverse variance weighted	5	0.975087	0.84-1.13	0.742476
Lachnospiraceae UCG010	Simple mode	5	0.902516	0.69-1.18	0.495252
Lachnospiraceae UCG010	Weighted mode	5	0.903283	0.69-1.18	0.494922
Lactobacillus	MR Egger	7	0.79407	0.44-1.44	0.48418
Lactobacillus	Weighted median	7	0.956072	0.83-1.11	0.547806
Lactobacillus	Inverse variance weighted	7	0.936295	0.79-1.11	0.443655
Lactobacillus	Simple mode	7	0.906721	0.70-1.17	0.47575
Lactobacillus	Weighted mode	7	0.917848	0.75-1.12	0.436602
Lactococcus	MR Egger	6	0.966358	0.39-2.41	0.944949
Lactococcus	Weighted median	6	0.944241	0.84-1.06	0.312893
Lactococcus	Inverse variance weighted	6	1.01746	0.88-1.18	0.816633
Lactococcus	Simple mode	6	0.917527	0.78-1.08	0.338939
Lactococcus	Weighted mode	6	0.919132	0.80-1.06	0.295673
Marvinbryantia	MR Egger	6	0.80426	0.48-1.35	0.455152
Marvinbryantia	Weighted median	6	1.04573	0.89-1.23	0.597224
Marvinbryantia	Inverse variance weighted	6	1.01427	0.89-1.16	0.834727
Marvinbryantia	Simple mode	6	1.07262	0.86-1.34	0.563743
Marvinbryantia	Weighted mode	6	1.06865	0.85-1.34	0.587027
Methanobrevibacter	MR Egger	3	1.15001	0.83-1.60	0.55708
Methanobrevibacter	Weighted median	3	1.09557	0.96-1.25	0.174684
Methanobrevibacter	Inverse variance weighted	3	1.08754	0.98-1.21	0.115924
Methanobrevibacter	Simple mode	3	1.10172	0.95-1.27	0.319119
Methanobrevibacter	Weighted mode	3	1.10146	0.96-1.27	0.304757
Odoribacter	MR Egger	3	0.447854	0.23-0.87	0.252667
Odoribacter	Weighted median	3	0.945222	0.69-1.30	0.731554
Odoribacter	Inverse variance weighted	3	1.02711	0.68-1.54	0.897361
Odoribacter	Simple mode	3	0.911153	0.58-1.42	0.721426
Odoribacter	Weighted mode	3	0.87975	0.59-1.31	0.592633
Olsenella	MR Egger	7	1.03287	0.81-1.32	0.805634
Olsenella	Weighted median	7	0.989208	0.90-1.09	0.823175
Olsenella	Inverse variance weighted	7	0.984248	0.92-1.06	0.663661
Olsenella	Simple mode	7	0.981868	0.86-1.12	0.799942
Olsenella	Weighted mode	7	0.981868	0.86-1.11	0.786981
Oscillibacter	MR Egger	12	0.879603	0.57-1.35	0.572457
Oscillibacter	Weighted median	12	1.05898	0.94-1.19	0.344559
Oscillibacter	Inverse variance weighted	12	1.06226	0.94-1.19	0.31243
Oscillibacter	Simple mode	12	1.04693	0.86-1.27	0.654447
Oscillibacter	Weighted mode	12	1.05247	0.88-1.25	0.577655
Oscillospira	MR Egger	3	0.655435	0.19-2.22	0.620833
Oscillospira	Weighted median	3	0.923762	0.73-1.16	0.498515
Oscillospira	Inverse variance weighted	3	0.870049	0.71-1.06	0.166495
Oscillospira	Simple mode	3	0.950374	0.71-1.26	0.760416
Oscillospira	Weighted mode	3	0.947162	0.72-1.24	0.731368
Oxalobacter	MR Egger	8	1.01207	0.58-1.78	0.968028
Oxalobacter	Weighted median	8	1.01257	0.91-1.12	0.8115
Oxalobacter	Inverse variance weighted	8	0.954676	0.85-1.07	0.413546
Oxalobacter	Simple mode	8	1.0283	0.89-1.19	0.714524
Oxalobacter	Weighted mode	8	1.03813	0.91-1.19	0.597067
Parabacteroides	MR Egger	3	3.04282	0.62-14.90	0.400948
Parabacteroides	Weighted median	3	1.14627	0.85-1.55	0.379584
Parabacteroides	Inverse variance weighted	3	1.09291	0.85-1.41	0.492996
Parabacteroides	Simple mode	3	1.25635	0.85-1.86	0.371898
Parabacteroides	Weighted mode	3	1.24303	0.85-1.81	0.374955
Paraprevotella	MR Egger	9	1.13459	0.88-1.47	0.367085
Paraprevotella	Weighted median	9	0.969039	0.87-1.08	0.573558
Paraprevotella	Inverse variance weighted	9	0.95888	0.88-1.04	0.305866
Paraprevotella	Simple mode	9	0.92815	0.77-1.12	0.467234
Paraprevotella	Weighted mode	9	0.984191	0.83-1.16	0.855098
Parasutterella	MR Egger	11	0.941028	0.63-1.42	0.77728
Parasutterella	Weighted median	11	0.940725	0.82-1.07	0.367848
Parasutterella	Inverse variance weighted	11	0.974268	0.88-1.07	0.595247
Parasutterella	Simple mode	11	0.917795	0.75-1.13	0.428189
Parasutterella	Weighted mode	11	0.921294	0.75-1.13	0.443485
Peptococcus	MR Egger	8	0.904755	0.66-1.24	0.552939
Peptococcus	Weighted median	8	0.953069	0.86-1.06	0.369567
Peptococcus	Inverse variance weighted	8	0.99564	0.92-1.08	0.918648
Peptococcus	Simple mode	8	0.937323	0.81-1.08	0.402022
Peptococcus	Weighted mode	8	0.939899	0.81-1.09	0.435502
Phascolarctobacterium	MR Egger	6	1.19551	0.67-2.15	0.582319
Phascolarctobacterium	Weighted median	6	1.10311	0.94-1.29	0.227887
Phascolarctobacterium	Inverse variance weighted	6	1.07255	0.95-1.22	0.276119
Phascolarctobacterium	Simple mode	6	1.14696	0.92-1.44	0.28696
Phascolarctobacterium	Weighted mode	6	1.14093	0.91-1.43	0.308284
Prevotella7	MR Egger	5	0.320424	0.11-0.96	0.135353
Prevotella7	Weighted median	5	0.982064	0.88-1.10	0.745152
Prevotella7	Inverse variance weighted	5	1.03813	0.89-1.21	0.624028
Prevotella7	Simple mode	5	0.991001	0.87-1.14	0.902469
Prevotella7	Weighted mode	5	0.994032	0.88-1.13	0.930342
Prevotella9	MR Egger	6	0.971158	0.73-1.29	0.851238
Prevotella9	Weighted median	6	1.0393	0.91-1.19	0.576352
Prevotella9	Inverse variance weighted	6	1.04561	0.94-1.17	0.423812
Prevotella9	Simple mode	6	1.02548	0.86-1.23	0.794717
Prevotella9	Weighted mode	6	1.01773	0.86-1.21	0.848899
Rikenellaceae RC9 gut group	MR Egger	6	0.930358	0.51-1.70	0.825757
Rikenellaceae RC9 gut group	Weighted median	6	1.01676	0.92-1.12	0.7334
Rikenellaceae RC9 gut group	Inverse variance weighted	6	1.02279	0.93-1.12	0.628141
Rikenellaceae RC9 gut group	Simple mode	6	1.01953	0.88-1.19	0.812061
Rikenellaceae RC9 gut group	Weighted mode	6	1.01681	0.88-1.18	0.830737
Romboutsia	MR Egger	3	1.93571	0.47-7.92	0.526797
Romboutsia	Weighted median	3	1.15474	0.91-1.47	0.247146
Romboutsia	Inverse variance weighted	3	1.12672	0.91-1.40	0.275733
Romboutsia	Simple mode	3	1.16541	0.85-1.59	0.436375
Romboutsia	Weighted mode	3	1.20772	0.88-1.66	0.361761
Roseburia	MR Egger	6	0.990205	0.41-2.41	0.983718
Roseburia	Weighted median	6	1.27927	1.02-1.61	0.0340584
Roseburia	Inverse variance weighted	6	1.18167	0.96-1.45	0.112257
Roseburia	Simple mode	6	1.40804	0.96-2.06	0.140091
Roseburia	Weighted mode	6	1.3972	0.94-2.07	0.156837
Ruminiclostridium5	MR Egger	6	1.13097	0.47-2.72	0.796843
Ruminiclostridium5	Weighted median	6	0.870667	0.69-1.10	0.239177
Ruminiclostridium5	Inverse variance weighted	6	0.919264	0.75-1.13	0.414904
Ruminiclostridium5	Simple mode	6	0.873166	0.60-1.26	0.501491
Ruminiclostridium5	Weighted mode	6	0.873166	0.62-1.24	0.48177
Ruminiclostridium6	MR Egger	9	0.997236	0.72-1.38	0.987208
Ruminiclostridium6	Weighted median	9	1.03959	0.90-1.20	0.588315
Ruminiclostridium6	Inverse variance weighted	9	1.01139	0.90-1.13	0.842103
Ruminiclostridium6	Simple mode	9	1.05411	0.83-1.34	0.679407
Ruminiclostridium6	Weighted mode	9	1.05411	0.86-1.29	0.628486
Ruminiclostridium9	MR Egger	5	1.11932	0.47-2.64	0.813538
Ruminiclostridium9	Weighted median	5	1.19126	0.94-1.52	0.156329
Ruminiclostridium9	Inverse variance weighted	5	1.16294	0.97-1.39	0.103103
Ruminiclostridium9	Simple mode	5	1.31508	0.93-1.85	0.192433
Ruminiclostridium9	Weighted mode	5	1.30328	0.92-1.84	0.205651
Ruminococcaceae NK4A214 group	MR Egger	9	1.29063	0.86-1.94	0.258797
Ruminococcaceae NK4A214 group	Weighted median	9	1.01653	0.87-1.19	0.837861
Ruminococcaceae NK4A214 group	Inverse variance weighted	9	1.01128	0.89-1.14	0.857884
Ruminococcaceae NK4A214 group	Simple mode	9	1.04484	0.82-1.33	0.734646
Ruminococcaceae NK4A214 group	Weighted mode	9	1.04484	0.81-1.34	0.739744
Ruminococcaceae UCG002	MR Egger	10	1.13955	0.77-1.69	0.535467
Ruminococcaceae UCG002	Weighted median	10	1.02798	0.89-1.19	0.716893
Ruminococcaceae UCG002	Inverse variance weighted	10	0.990691	0.86-1.15	0.900274
Ruminococcaceae UCG002	Simple mode	10	1.01015	0.79-1.29	0.936779
Ruminococcaceae UCG002	Weighted mode	10	1.03784	0.86-1.25	0.702891
Ruminococcaceae UCG003	MR Egger	10	1.13155	0.72-1.77	0.602349
Ruminococcaceae UCG003	Weighted median	10	1.09721	0.94-1.28	0.249299
Ruminococcaceae UCG003	Inverse variance weighted	10	1.0124	0.89-1.15	0.846065
Ruminococcaceae UCG003	Simple mode	10	1.14618	0.89-1.47	0.308992
Ruminococcaceae UCG003	Weighted mode	10	1.13064	0.89-1.43	0.331783
Ruminococcaceae UCG004	MR Egger	3	1.86338	0.93-3.72	0.328002
Ruminococcaceae UCG004	Weighted median	3	1.16629	0.95-1.43	0.141784
Ruminococcaceae UCG004	Inverse variance weighted	3	1.20738	1.02-1.43	0.0292956
Ruminococcaceae UCG004	Simple mode	3	1.13776	0.88-1.47	0.428486
Ruminococcaceae UCG004	Weighted mode	3	1.11784	0.85-1.48	0.514471
Ruminococcaceae UCG005	MR Egger	9	0.799135	0.59-1.08	0.192106
Ruminococcaceae UCG005	Weighted median	9	0.887888	0.77-1.03	0.111637
Ruminococcaceae UCG005	Inverse variance weighted	9	0.934697	0.83-1.05	0.255613
Ruminococcaceae UCG005	Simple mode	9	0.874847	0.68-1.12	0.325076
Ruminococcaceae UCG005	Weighted mode	9	0.873428	0.71-1.08	0.247552
Ruminococcaceae UCG009	MR Egger	6	1.52287	0.64-3.60	0.392598
Ruminococcaceae UCG009	Weighted median	6	1.06718	0.93-1.23	0.362536
Ruminococcaceae UCG009	Inverse variance weighted	6	1.06079	0.93-1.21	0.364598
Ruminococcaceae UCG009	Simple mode	6	1.06889	0.86-1.33	0.580351
Ruminococcaceae UCG009	Weighted mode	6	1.06889	0.86-1.33	0.572408
Ruminococcaceae UCG010	MR Egger	4	0.556241	0.01-61.70	0.829874
Ruminococcaceae UCG010	Weighted median	4	1.08933	0.87-1.36	0.4504
Ruminococcaceae UCG010	Inverse variance weighted	4	1.08486	0.87-1.35	0.461395
Ruminococcaceae UCG010	Simple mode	4	1.14262	0.80-1.63	0.513047
Ruminococcaceae UCG010	Weighted mode	4	1.11726	0.78-1.59	0.583067
Ruminococcaceae UCG011	MR Egger	6	0.884422	0.60-1.30	0.567448
Ruminococcaceae UCG011	Weighted median	6	0.96154	0.88-1.05	0.401909
Ruminococcaceae UCG011	Inverse variance weighted	6	0.949802	0.88-1.02	0.177305
Ruminococcaceae UCG011	Simple mode	6	0.957029	0.84-1.09	0.543392
Ruminococcaceae UCG011	Weighted mode	6	0.973531	0.85-1.11	0.705497
Ruminococcaceae UCG013	MR Egger	7	0.838464	0.60-1.18	0.353342
Ruminococcaceae UCG013	Weighted median	7	0.957861	0.81-1.14	0.626887
Ruminococcaceae UCG013	Inverse variance weighted	7	0.971016	0.85-1.11	0.657809
Ruminococcaceae UCG013	Simple mode	7	0.957414	0.73-1.26	0.766562
Ruminococcaceae UCG013	Weighted mode	7	0.877253	0.69-1.12	0.330455
Ruminococcaceae UCG014	MR Egger	6	1.1682	0.85-1.60	0.384834
Ruminococcaceae UCG014	Weighted median	6	0.99556	0.85-1.17	0.956908
Ruminococcaceae UCG014	Inverse variance weighted	6	0.998794	0.88-1.14	0.985638
Ruminococcaceae UCG014	Simple mode	6	0.964346	0.77-1.21	0.76953
Ruminococcaceae UCG014	Weighted mode	6	1.04646	0.83-1.31	0.710303
Ruminococcus gauvreauii group	MR Egger	7	0.672939	0.37-1.23	0.256274
Ruminococcus gauvreauii group	Weighted median	7	1.00645	0.84-1.20	0.943354
Ruminococcus gauvreauii group	Inverse variance weighted	7	1.02941	0.88-1.21	0.724629
Ruminococcus gauvreauii group	Simple mode	7	1.01424	0.80-1.28	0.908512
Ruminococcus gauvreauii group	Weighted mode	7	1.00984	0.80-1.28	0.938608
Ruminococcus gnavus group	MR Egger	7	1.17603	0.70-1.98	0.568848
Ruminococcus gnavus group	Weighted median	7	0.935704	0.83-1.06	0.298677
Ruminococcus gnavus group	Inverse variance weighted	7	0.963041	0.86-1.08	0.520941
Ruminococcus gnavus group	Simple mode	7	0.906085	0.75-1.09	0.3365
Ruminococcus gnavus group	Weighted mode	7	0.907745	0.76-1.08	0.318552
Ruminococcus torques group	MR Egger	5	0.809544	0.49-1.33	0.465588
Ruminococcus torques group	Weighted median	5	0.858016	0.70-1.06	0.146478
Ruminococcus torques group	Inverse variance weighted	5	0.887822	0.75-1.05	0.168237
Ruminococcus torques group	Simple mode	5	0.843875	0.63-1.13	0.321037
Ruminococcus torques group	Weighted mode	5	0.838469	0.63-1.12	0.300093
Ruminococcus1	MR Egger	5	1.47418	0.49-4.40	0.536468
Ruminococcus1	Weighted median	5	0.886938	0.69-1.14	0.34572
Ruminococcus1	Inverse variance weighted	5	0.991685	0.77-1.27	0.947983
Ruminococcus1	Simple mode	5	0.830757	0.61-1.14	0.310247
Ruminococcus1	Weighted mode	5	0.832916	0.60-1.16	0.339327
Ruminococcus2	MR Egger	7	1.23313	0.92-1.65	0.220547
Ruminococcus2	Weighted median	7	1.08181	0.91-1.28	0.359329
Ruminococcus2	Inverse variance weighted	7	1.0418	0.92-1.18	0.525663
Ruminococcus2	Simple mode	7	1.09832	0.86-1.40	0.475976
Ruminococcus2	Weighted mode	7	1.11795	0.91-1.38	0.33759
Sellimonas	MR Egger	6	0.838264	0.57-1.24	0.425478
Sellimonas	Weighted median	6	0.963933	0.88-1.06	0.439051
Sellimonas	Inverse variance weighted	6	1.00124	0.93-1.08	0.975475
Sellimonas	Simple mode	6	0.951708	0.83-1.09	0.507215
Sellimonas	Weighted mode	6	0.953666	0.83-1.09	0.525058
Slackia	MR Egger	4	1.51052	0.54-4.24	0.515715
Slackia	Weighted median	4	0.933509	0.81-1.08	0.354966
Slackia	Inverse variance weighted	4	0.929191	0.82-1.05	0.22659
Slackia	Simple mode	4	0.937254	0.77-1.15	0.575197
Slackia	Weighted mode	4	0.935078	0.76-1.15	0.563793
Streptococcus	MR Egger	11	1.02384	0.68-1.55	0.913236
Streptococcus	Weighted median	11	0.915437	0.78-1.07	0.273267
Streptococcus	Inverse variance weighted	11	1.04508	0.93-1.17	0.447454
Streptococcus	Simple mode	11	0.889622	0.68-1.17	0.424306
Streptococcus	Weighted mode	11	0.891249	0.67-1.18	0.443893
Subdoligranulum	MR Egger	7	0.965836	0.66-1.41	0.863688
Subdoligranulum	Weighted median	7	1.06679	0.89-1.28	0.489346
Subdoligranulum	Inverse variance weighted	7	1.08267	0.94-1.25	0.283431
Subdoligranulum	Simple mode	7	1.05154	0.80-1.38	0.729997
Subdoligranulum	Weighted mode	7	1.03229	0.79-1.34	0.821527
Sutterella	MR Egger	4	0.772678	0.34-1.78	0.605997
Sutterella	Weighted median	4	0.972888	0.79-1.20	0.796209
Sutterella	Inverse variance weighted	4	0.957636	0.76-1.21	0.71243
Sutterella	Simple mode	4	1.12374	0.75-1.68	0.607003
Sutterella	Weighted mode	4	0.871881	0.61-1.24	0.503391
Turicibacter	MR Egger	6	1.22961	0.64-2.37	0.569451
Turicibacter	Weighted median	6	1.01935	0.89-1.17	0.781061
Turicibacter	Inverse variance weighted	6	1.02954	0.92-1.16	0.62533
Turicibacter	Simple mode	6	1.00463	0.82-1.23	0.966573
Turicibacter	Weighted mode	6	1.01015	0.82-1.25	0.928868
Tyzzerella3	MR Egger	9	0.824659	0.54-1.25	0.395886
Tyzzerella3	Weighted median	9	1.01456	0.92-1.11	0.760132
Tyzzerella3	Inverse variance weighted	9	0.972948	0.91-1.04	0.446355
Tyzzerella3	Simple mode	9	1.02316	0.87-1.21	0.793263
Tyzzerella3	Weighted mode	9	1.02316	0.89-1.18	0.759829
Veillonella	MR Egger	4	0.0313923	0.00-0.88	0.178677
Veillonella	Weighted median	4	1.05565	0.88-1.27	0.563322
Veillonella	Inverse variance weighted	4	1.09015	0.91-1.31	0.356221
Veillonella	Simple mode	4	0.962883	0.70-1.32	0.828014
Veillonella	Weighted mode	4	0.960695	0.72-1.28	0.799529
Victivallis	MR Egger	5	0.854028	0.51-1.42	0.58753
Victivallis	Weighted median	5	0.914934	0.83-1.01	0.0831461
Victivallis	Inverse variance weighted	5	0.940298	0.87-1.02	0.123262
Victivallis	Simple mode	5	0.907802	0.79-1.04	0.241531
Victivallis	Weighted mode	5	0.907207	0.79-1.04	0.23361
