# Supplementary material for: Association of gut microbiota with age-related macular degeneration and glaucoma: a bidirectional Mendelian randomization study
Source: Preprints.org preprint supplement (doi:10.20944/preprints202310.0525.v1), 2023-10-09
Supplement: Supplementary file 6 [file S5 Heterogeneity tests of bacteria on AMD and glaucoma.xlsx]

## Sheet: Sheet1
Table S5. Heterogeneity tests of bacteria on AMD and glaucoma.
Bacterial taxa (Exposures)	AMD (outcome)			glaucoma (outcome)
	Cochran's Q	df	P	Cochran's Q	df	P
Adlercreutzia	7.10933	3	0.0684936	3.84722	3	0.278442
Akkermansia	5.59145	8	0.692889	29.0994	8	0.000304614
Alistipes	3.71295	4	0.446245	1.60155	4	0.808513
Allisonella	6.67126	3	0.0831476	0.915854	3	0.8216
Anaerofilum	10.9624	5	0.0521302	2.26792	5	0.810967
Anaerostipes	3.13768	9	0.958585	41.1235	9	4.74967e-06
Anaerotruncus	1.99195	4	0.73724	12.3546	4	0.0149004
Bacteroides	5.01513	4	0.285749	5.41299	4	0.247484
Barnesiella	8.59571	9	0.475398	6.76204	9	0.661879
Bifidobacterium	1.44347	5	0.9195	4.20047	5	0.520929
Bilophila	1.64192	5	0.896134	4.09431	5	0.535919
Butyricimonas	18.0868	7	0.0115844	7.79263	7	0.351234
Butyrivibrio	11.5797	6	0.0720289	10.223	6	0.115571
Candidatus Soleaferrea	2.69983	3	0.440256	2.71665	3	0.437405
Catenibacterium	0.402796	3	0.939664	5.37191	3	0.146504
Christensenellaceae (R7 group)	2.77363	2	0.24987	0.558343	2	0.75641
Clostridium sensustricto 1	8.80468	5	0.117113	16.7659	5	0.00496577
Collinsella	1.2115	2	0.545666	1.84294	2	0.397933
Coprobacter	3.24457	4	0.517763	6.14535	4	0.188553
Coprococcus 1	5.84541	6	0.440728	11.7712	6	0.0672717
Coprococcus 2	1.52453	2	0.466608	3.76037	2	0.152562
Coprococcus3	2.321	4	0.676948	8.47016	4	0.0757969
Defluviitaleaceae (UCG011)	6.59428	7	0.472308	12.1465	7	0.0958443
Desulfovibrio	1.09544	4	0.894995	1.36913	4	0.849543
Dorea	3.99111	4	0.407211	0.591874	4	0.963962
Eggerthella	1.16962	4	0.883074	8.76511	4	0.0672463
Eisenbergiella	6.91396	4	0.140506	4.95009	4	0.292457
Enterorhabdus	0.421755	2	0.809873	0.526838	2	0.76842
Erysipelatoclostridium	15.4811	7	0.0303034	11.9026	7	0.103807
Escherichia Shigella	1.99401	3	0.573651	5.86802	3	0.118211
Eubacterium (brachy group)	2.05016	3	0.56206	4.0366	3	0.257539
Eubacterium (coprostanoligenes group)	3.70714	5	0.592301	10.6275	5	0.0592877
Eubacterium (eligens group)	0.944988	2	0.623446	2.17015	2	0.337876
Eubacterium (fissicatena group)	1.92558	4	0.749444	3.37551	4	0.497058
Eubacterium (hallii group)	4.79949	7	0.684418	11.5418	7	0.116672
Eubacterium (nodatum group)	2.56406	2	0.277473	6.52408	2	0.0383101
Eubacterium (oxidoreducens group)	1.91765	3	0.589673	2.05012	2	0.358775
Eubacterium (rectale group)	4.40909	3	0.220544	0.293758	3	0.961198
Eubacterium (ruminantium group)	4.44079	9	0.880085	8.82667	9	0.453425
Eubacterium (ventriosum group)	4.59739	7	0.70896	4.25189	7	0.75035
Eubacterium (xylanophilum group)	7.45248	6	0.28102	11.5229	6	0.0734981
Faecalibacterium	0.250145	2	0.882433	3.81175	2	0.148692
Family XIIIAD (3011 group)	6.20417	6	0.400712	4.94495	6	0.550893
Family XIII (UCG001)	0.973614	4	0.91377	2.90435	4	0.573957
Flavonifractor	0.973614	4	0.91377	4.22655	3	0.238017
Fusicatenibacter	3.81515	8	0.873404	1.69964	8	0.988877
Gordonibacter	0.585662	2	0.746148	5.73293	2	0.0568998
Haemophilus	4.21411	8	0.837307	5.43637	8	0.710079
Holdemanella	6.482	5	0.2621	3.21665	5	0.666625
Holdemania	5.46728	5	0.361547	11.1629	5	0.0482445
Howardella	3.56859	6	0.734823	6.45343	6	0.374356
Intestinibacter	4.5135	6	0.60754	2.39968	6	0.879521
Intestinimonas	3.75942	10	0.957548	19.3763	10	0.0357356
Lachnoclostridium	4.35309	5	0.499776	5.73696	5	0.33266
Lachnospiraceae (FCS020 group)	6.33775	6	0.386437	4.85204	6	0.562925
Lachnospiraceae (NC2004 group)	0.37916	2	0.827307	8.5365	2	0.0140063
Lachnospiraceae (NK4A136 group)	2.30773	6	0.889335	11.7919	6	0.0667758
Lachnospiraceae (UCG001)	10.5578	6	0.103043	9.60575	6	0.142267
Lachnospiraceae (UCG004)	8.25993	6	0.219672	6.9221	6	0.328112
Lachnospiraceae (UCG008)	2.64388	7	0.915879	3.74205	7	0.808963
Lachnospiraceae (UCG010)	14.814	4	0.00510301	1.67373	4	0.795485
Lactobacillus	7.38169	6	0.286986	19.601	6	0.00326036
Lactococcus	5.28151	5	0.382498	16.663	5	0.00518533
Marvinbryantia	6.92222	5	0.226489	2.58832	5	0.76314
Methanobrevibacter	1.13074	2	0.568149	0.134465	2	0.934978
Odoribacter	2.94762	2	0.229051	7.44118	2	0.0242196
Olsenella	5.11694	6	0.528905	2.9051	6	0.82066
Oscillibacter	8.71983	11	0.647735	23.4754	11	0.0151355
Oscillospira	2.94188	2	0.229709	2.3669	2	0.306221
Oxalobacter	7.86733	7	0.344438	17.4811	7	0.0145437
Parabacteroides	0.316993	2	0.853426	2.38765	2	0.303059
Paraprevotella	10.6951	8	0.219579	7.76425	8	0.456831
Parasutterella	9.09291	10	0.52331	5.39364	10	0.863381
Peptococcus	1.52187	7	0.981543	7.89015	7	0.34238
Phascolarctobacterium	1.78245	5	0.878353	2.68022	5	0.749142
Prevotella 7	4.36792	4	0.358498	13.6951	4	0.00833438
Prevotella 9	6.71033	5	0.24309	0.655776	5	0.985307
Rikenellaceae (RC9gut group)	7.29292	5	0.199751	7.70709	5	0.173135
Romboutsia	2.09766	2	0.350348	2.42991	2	0.296723
Roseburia	5.76122	5	0.330151	7.589	5	0.180389
Ruminiclostridium 5	3.51096	5	0.62173	7.23634	5	0.203648
Ruminiclostridium 6	15.9654	8	0.0428782	8.9684	8	0.344969
Ruminiclostridium 9	3.91458	4	0.417689	3.28719	4	0.510965
Ruminococcaceae (NK4A214 group)	8.85646	8	0.354549	5.51713	8	0.701141
Ruminococcaceae (UCG002)	4.9949	9	0.834753	15.0918	9	0.0884441
Ruminococcaceae (UCG003)	6.19441	9	0.720315	10.8407	9	0.286789
Ruminococcaceae (UCG004)	2.28467	2	0.319073	2.31508	2	0.314259
Ruminococcaceae (UCG005)	5.98351	8	0.649079	4.82812	8	0.775779
Ruminococcaceae (UCG009)	6.45744	5	0.264216	6.71117	5	0.243022
Ruminococcaceae (UCG010)	3.12742	3	0.372393	4.63274	3	0.200751
Ruminococcaceae (UCG011)	5.93977	5	0.312124	2.43746	5	0.785882
Ruminococcaceae (UCG013)	13.1487	6	0.0407347	4.48281	6	0.611633
Ruminococcaceae (UCG014)	8.82402	5	0.116292	1.61338	5	0.899626
Ruminococcus 1	9.81827	4	0.0436027	8.40802	4	0.0777247
Ruminococcus 2	3.07039	6	0.799962	5.62207	6	0.466827
Ruminococcus (gauvreauii group)	6.20547	6	0.400571	9.47001	6	0.148819
Ruminococcus (gnavus group)	6.19403	6	0.401809	9.83772	6	0.131655
Ruminococcus (torques group)	1.03329	4	0.904707	1.73894	4	0.783632
Sellimonas	1.64638	5	0.895584	6.55226	5	0.256124
Slackia	1.71442	3	0.633733	1.72217	3	0.632017
Streptococcus	10.7735	10	0.375432	10.0014	10	0.44037
Subdoligranulum	7.90059	6	0.245477	3.73511	6	0.712471
Sutterella	4.32495	3	0.228446	5.64903	3	0.129992
Turicibacter	5.39136	5	0.370006	1.90256	5	0.862457
Tyzzerella 3	9.11587	8	0.332616	6.57195	8	0.583439
Veillonella	2.532	3	0.469536	4.50706	3	0.211661
victivallis	4.92645	4	0.294927	2.602	4	0.626469
