# Supplementary material for: Association of gut microbiota with age-related macular degeneration and glaucoma: a bidirectional Mendelian randomization study
Source: Preprints.org preprint supplement (doi:10.20944/preprints202310.0525.v1), 2023-10-09
Supplement: Supplementary file 7 [file S6 Horizontal pleiotropy tests of bacteria on AMD and glaucoma.xlsx]

## Sheet: Sheet1
Table S6. Horizontal pleiotropy tests of bacteria on AMD and glaucoma.
Bacterial taxa (exposure)	AMD (outcome)			glaucoma (outcome)
	Egger intercept	SE	P-value	Egger intercept	SE	P-value
Adlercreutzia	-0.0114402	0.0692779	0.88402	-0.0150638	0.035041	0.709162
Akkermansia	-0.00555504	0.0206347	0.795532	-0.0303986	0.0263096	0.28583
Alistipes	0.0642125	0.0570769	0.342466	-0.0473927	0.0424254	0.345363
Allisonella	-0.126281	0.0559194	0.152474	-0.0334976	0.042201	0.51055
Anaerofilum	0.101809	0.0379123	0.0549213	0.00911905	0.0257721	0.741326
Anaerostipes	-0.0294872	0.0239803	0.253765	-0.0547251	0.0315089	0.120628
Anaerotruncus	0.0189302	0.0442266	0.697499	-0.0212022	0.0668069	0.771772
Bacteroides	0.0149134	0.0591853	0.817334	0.0124454	0.0437414	0.794519
Barnesiella	0.0087697	0.0204512	0.679374	0.00793588	0.0136088	0.575863
Bifidobacterium	-0.00501473	0.0193969	0.808754	-0.00153971	0.0140867	0.918227
Bilophila	0.0456787	0.0417149	0.335017	-0.0168744	0.0287931	0.589313
Butyricimonas	0.0339184	0.0394664	0.423108	-0.0231025	0.017779	0.241489
Butyrivibrio	0.00247133	0.0493752	0.962019	-0.00382995	0.0311351	0.90689
Candidatus Soleaferrea	-0.0396561	0.0387293	0.413549	-0.0378937	0.0240187	0.255371
Catenibacterium	-0.0131003	0.109819	0.915948	-0.143352	0.0777155	0.206403
Christensenellaceae (R7 group)	0.0273386	0.0520143	0.69193	0.0172426	0.0258423	0.625421
Clostridium sensustricto 1	0.0400122	0.022731	0.153173	-0.0232986	0.0264423	0.428019
Collinsella	0.00079574	0.166112	0.99695	0.0618321	0.132185	0.721458
Coprobacter	0.0102631	0.0254559	0.713834	-0.00589603	0.0252451	0.830363
Coprococcus 1	0.0244817	0.0215771	0.307984	-0.016601	0.0224741	0.493298
Coprococcus 2	-0.088994	0.103579	0.548124	-0.0809406	0.119979	0.622172
Coprococcus3	-0.00431112	0.026287	0.880156	-0.0326004	0.0220454	0.235739
Defluviitaleaceae (UCG011)	-0.0128736	0.0262922	0.641776	0.0201983	0.0232899	0.419129
Desulfovibrio	-0.0337586	0.0548728	0.581933	0.000568195	0.0383035	0.989096
Dorea	-0.00961543	0.0383481	0.818207	-0.0041854	0.0237606	0.871397
Eggerthella	-0.0329719	0.0347988	0.413285	0.0309259	0.0358798	0.452116
Eisenbergiella	0.0686078	0.0905886	0.503892	0.030427	0.0592453	0.642979
Enterorhabdus	0.0210987	0.0355142	0.658731	0.0158766	0.0263256	0.654516
Erysipelatoclostridium	0.0665692	0.0333168	0.0926743	-0.0338522	0.0228108	0.188329
Escherichia Shigella	-0.0220909	0.025796	0.482021	-0.0195665	0.0270911	0.545174
Eubacterium (brachy group)	0.0428997	0.034574	0.340481	0.0416784	0.0242041	0.227219
Eubacterium (coprostanoligenes group)	-0.0396264	0.0249882	0.187967	-0.0126975	0.0280453	0.674199
Eubacterium (eligens group)	0.00840838	0.0450365	0.882495	-0.046403	0.0323808	0.387867
Eubacterium (fissicatena group)	0.00255435	0.0447923	0.95811	0.0359996	0.0308844	0.328015
Eubacterium (hallii group)	0.02153	0.0140797	0.177096	-0.00907268	0.0127879	0.504654
Eubacterium (nodatum group)	-0.0529343	0.213037	0.844956	-0.199949	0.145681	0.400852
Eubacterium (oxidoreducens group)	-0.0374766	0.0313084	0.353941	-0.0164525	0.0303411	0.68368
Eubacterium (rectale group)	-0.0244959	0.055365	0.701416	-0.0137933	0.027044	0.660741
Eubacterium (ruminantium group)	-0.00291552	0.0215512	0.89573	-0.00685155	0.0155898	0.671937
Eubacterium (ventriosum group)	0.0307627	0.0260734	0.282715	-0.00742109	0.018506	0.702303
Eubacterium (xylanophilum group)	0.0114794	0.0312432	0.728345	0.0314623	0.0211168	0.196429
Faecalibacterium	0.0135442	0.0271691	0.705589	-0.00359119	0.0344429	0.933862
Family XIIIAD (3011 group)	-0.0650554	0.0370174	0.139184	-0.00150674	0.0245737	0.953484
Family XIII (UCG001)	0.0083223	0.0216687	0.726532	-0.00332606	0.0156744	0.845552
Flavonifractor	-0.0637693	0.0530404	0.35229	-0.0159206	0.0442353	0.753368
Fusicatenibacter	-0.00972482	0.0306747	0.760467	0.000705598	0.0221915	0.975522
Gordonibacter	0.0225991	0.0693658	0.799496	-0.112141	0.0502716	0.268291
Haemophilus	0.00263219	0.0160776	0.87458	-0.0137861	0.0115112	0.270038
Holdemanella	0.043822	0.0257254	0.163692	-0.000358386	0.0134469	0.980014
Holdemania	-0.0471867	0.0385973	0.288611	0.0477676	0.0368567	0.264686
Howardella	0.0275223	0.0291974	0.389151	0.0293459	0.0213338	0.227384
Intestinibacter	0.00202091	0.0268645	0.942952	0.00858124	0.0194643	0.677717
Intestinimonas	0.00881679	0.0172281	0.621133	-0.0040356	0.0177631	0.825352
Lachnoclostridium	-0.0377827	0.035811	0.350908	-0.0196602	0.0290177	0.535237
Lachnospiraceae (FCS020 group)	0.0127668	0.0161502	0.465057	-0.000518536	0.0109617	0.964102
Lachnospiraceae (NC2004 group)	0.0429518	0.0897108	0.715731	0.172183	0.0902611	0.30738
Lachnospiraceae (NK4A136 group)	-0.000137169	0.0127559	0.991836	-0.00203195	0.0142613	0.892265
Lachnospiraceae (UCG001)	0.000960754	0.0512345	0.985764	0.0339035	0.0291286	0.296969
Lachnospiraceae (UCG004)	0.0186225	0.0465274	0.705501	-0.00832165	0.0279608	0.777964
Lachnospiraceae (UCG008)	0.00864843	0.0472555	0.860815	0.0564096	0.0348808	0.15696
Lachnospiraceae (UCG010)	0.0322918	0.0858834	0.731935	-0.024398	0.0263076	0.422119
Lactobacillus	0.0215627	0.0292934	0.494735	0.0177284	0.0313535	0.596206
Lactococcus	-0.0123952	0.0437354	0.790924	0.00669444	0.059523	0.91587
Marvinbryantia	0.0394526	0.0347373	0.319498	0.0199625	0.0219215	0.413999
Methanobrevibacter	0.0185588	0.0361006	0.6977	-0.00939724	0.026693	0.784505
Odoribacter	-0.0461924	0.0407228	0.45999	0.0668788	0.0257077	0.233626
Olsenella	0.0119812	0.0250667	0.652835	-0.00726277	0.0179511	0.702509
Oscillibacter	0.0195424	0.0216098	0.387088	0.0181997	0.0203906	0.393068
Oscillospira	0.00317108	0.111247	0.981858	0.0301392	0.0648933	0.723199
Oxalobacter	-0.034488	0.0364383	0.380446	-0.00876271	0.0421167	0.842066
Parabacteroides	-0.0148534	0.0845475	0.889287	-0.0815976	0.0639352	0.423114
Paraprevotella	0.0260855	0.0264029	0.356074	-0.0212872	0.0157356	0.218184
Parasutterella	-0.0138015	0.0224539	0.554	0.00271176	0.0158317	0.867788
Peptococcus	-0.0107479	0.0251121	0.683589	0.0122714	0.0195986	0.554283
Phascolarctobacterium	0.00523554	0.0376566	0.896142	-0.00995776	0.0267764	0.728841
Prevotella 7	0.132214	0.0788476	0.192169	0.1652	0.0783971	0.125699
Prevotella 9	-0.00898026	0.0302186	0.781125	0.008863	0.0162343	0.614125
Rikenellaceae (RC9gut group)	-0.0133127	0.0613469	0.838822	0.0135127	0.0432048	0.770091
Romboutsia	0.0847589	0.0650312	0.416635	-0.040961	0.053585	0.584503
Roseburia	0.0564733	0.0283714	0.117383	0.0110971	0.0275262	0.707459
Ruminiclostridium 5	-0.0150453	0.0331594	0.673553	-0.0148729	0.0310732	0.657183
Ruminiclostridium 6	-0.0414537	0.0311308	0.224718	0.00165647	0.0182325	0.930155
Ruminiclostridium 9	0.0217577	0.0437651	0.653237	0.00277404	0.0309957	0.934327
Ruminococcaceae (NK4A214 group)	-0.0336752	0.0225275	0.178604	-0.0194837	0.0158102	0.257602
Ruminococcaceae (UCG002)	0.0324715	0.0178637	0.106621	-0.0116002	0.0154704	0.474827
Ruminococcaceae (UCG003)	0.0122277	0.0192896	0.543841	-0.00853751	0.0167296	0.623605
Ruminococcaceae (UCG004)	0.00845324	0.0680943	0.921372	-0.0413224	0.0326757	0.425946
Ruminococcaceae (UCG005)	-0.00235484	0.0170947	0.894315	0.0132155	0.0121054	0.311106
Ruminococcaceae (UCG009)	0.00703726	0.0589564	0.910742	-0.0325408	0.0390724	0.451776
Ruminococcaceae (UCG010)	-0.200322	0.13483	0.275673	0.0406056	0.14581	0.806793
Ruminococcaceae (UCG011)	-0.00483088	0.0455617	0.920664	0.0101583	0.0275798	0.731296
Ruminococcaceae (UCG013)	-0.0158998	0.0344767	0.66404	0.0136281	0.0147594	0.398194
Ruminococcaceae (UCG014)	0.0327006	0.024628	0.254954	-0.0150328	0.0138848	0.339853
Ruminococcus 1	-0.00671818	0.0692314	0.928815	-0.0274692	0.0374641	0.516527
Ruminococcus 2	-0.009798	0.0184769	0.618612	-0.0158859	0.012731	0.267352
Ruminococcus (gauvreauii group)	0.000140715	0.0373601	0.99714	0.0314121	0.0221402	0.215177
Ruminococcus (gnavus group)	-0.0321665	0.0307958	0.344094	-0.0218114	0.0282752	0.475328
Ruminococcus (torques group)	-0.0161306	0.0242621	0.553689	0.0067486	0.0174192	0.724294
Sellimonas	0.0209682	0.0371646	0.602753	0.0259951	0.0285003	0.413315
Slackia	0.086582	0.0672109	0.326593	-0.0472819	0.0509296	0.45122
Streptococcus	-0.0127584	0.0214108	0.565934	0.00156918	0.0153721	0.920932
Subdoligranulum	0.0306705	0.02061	0.19688	0.00895923	0.0139283	0.548405
Sutterella	0.0319878	0.0384204	0.49267	0.0167982	0.0315861	0.648011
Turicibacter	-0.0336771	0.0624996	0.618589	-0.0211982	0.0392222	0.617565
Tyzzerella 3	-0.00240452	0.0483992	0.961765	0.0233798	0.0297083	0.457106
Veillonella	0.138824	0.171729	0.503737	0.260563	0.124731	0.171914
Victivallis	-0.0441644	0.0585059	0.505181	0.0132238	0.035381	0.733438
