# Supplementary material for: Association of gut microbiota with age-related macular degeneration and glaucoma: a bidirectional Mendelian randomization study
Source: Preprints.org preprint supplement (doi:10.20944/preprints202310.0525.v1), 2023-10-09
Supplement: Supplementary file 8 [file S7. Heterogeneity and horizontal pleiotropy tests of AMD on bacteria.xlsx]

## Sheet: Sheet1
Table S7. Heterogeneity and horizontal pleiotropy tests of AMD on bacteria.
Bacterial taxa (Outcomes)	AMD (exposure)			AMD (outcome)
	Cochran's Q	df	P	Egger intercept	SE	P
Dorea	2.16933	7	0.949877	0.00238925	0.00761992	0.764475
Eubacterium (oxidoreducens group)	6.9619	7	0.432857	-0.0184115	0.0138834	0.233034
Eubacterium (ventriosum group)	4.54944	7	0.714756	0.000205094	0.00817093	0.980789
Lachnospiraceae (NK4A136 group)	4.68145	7	0.698772	0.00755804	0.00770243	0.364363
Parabacteroides	14.4161	7	0.0442567	0.0142212	0.0104105	0.220911
Ruminococcaceae (UCG009)	9.94579	7	0.191667	0.0090046	0.0145158	0.557851
