# Supplementary material for: Association of gut microbiota with age-related macular degeneration and glaucoma: a bidirectional Mendelian randomization study
Source: Preprints.org preprint supplement (doi:10.20944/preprints202310.0525.v1), 2023-10-09
Supplement: Supplementary file 9 [file S8.Heterogeneity and horizontal pleiotropy tests of glaucoma on bacteria.xlsx]

## Sheet: Sheet1
Table S8. Heterogeneity and horizontal pleiotropy tests of glaucoma on bacteria.
Bacterial taxa (Outcomes)	glaucoma (exposure)			glaucoma(outcome)
	Cochran's Q	df	P	Egger intercept	SE	P
Eubacterium (nodatum group)	86.0393	80	0.302108	0.00120553	0.00931475	0.897353
Lachnospiraceae (NC2004 group)	83.4957	74	0.210778	0.0126868	0.00708746	0.0775944
Roseburia	60.6956	83	0.968785	0.0041791	0.00383295	0.27877
Ruminococcaceae (UCG004)	77.1859	82	0.62975	0.000379751	0.00524029	0.942409
